# Supplementary material for: Behavioural and weight status outcomes from an exploratory trial of the Healthy Lifestyles Programme (HeLP): a novel school-based obesity prevention programme
Source: PubMed Central journal article supplement — BMJ Open. 2012 May 14;2(3):e000390. doi: 10.1136/bmjopen-2011-000390 (PMC3358612; doi:10.1136/bmjopen-2011-000390), 2012-05-14
Supplement: bmjopen-2011-000390.draft_revisions.pdf [file bmjopen-2011-000390.draft_revisions.pdf]

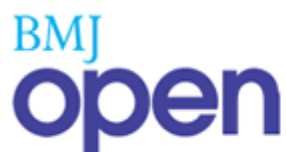

**Behavioural and weight status outcomes from an exploratory trial of the Healthy Lifestyles Programme (HeLP): A novel school-based obesity prevention programme**

|                                 |                                                                                                                                                                                                                                                                                                       |
|---------------------------------|-------------------------------------------------------------------------------------------------------------------------------------------------------------------------------------------------------------------------------------------------------------------------------------------------------|
| Journal:                        | <i>BMJ Open</i>                                                                                                                                                                                                                                                                                       |
| Manuscript ID:                  | bmjopen-2011-000390                                                                                                                                                                                                                                                                                   |
| Article Type:                   | Research                                                                                                                                                                                                                                                                                              |
| Date Submitted by the Author:   | 14-Sep-2011                                                                                                                                                                                                                                                                                           |
| Complete List of Authors:       | Lloyd, Jennifer; Peninsula College of Medicine and Dentistry, Institute for Health Service Research<br>Wyatt, Katrina; Peninsula College of Medicine and Dentistry, Institute for Health Service Research<br>Creanor, Siobhan; University of Plymouth, Centre for Health and Environmental Statistics |
| <b>Primary Subject Heading</b>: | Public health                                                                                                                                                                                                                                                                                         |
| Secondary Subject Heading:      |                                                                                                                                                                                                                                                                                                       |
| Keywords:                       | PUBLIC HEALTH, PREVENTIVE MEDICINE, Community child health < PAEDIATRICS                                                                                                                                                                                                                              |
|                                 |                                                                                                                                                                                                                                                                                                       |

SCHOLARONE™  
Manuscripts

only

1  
2  
3 Behavioural and weight status outcomes from an exploratory trial of the Healthy Lifestyles  
4 Programme (HeLP): A novel school-based obesity prevention programme  
5  
6

7 Author names and affiliations:  
8

9 \*Jennifer J Lloyd<sup>1</sup> Katrina M Wyatt<sup>1</sup> Siobhan Creanor<sup>2</sup>  
10

11 <sup>1,2</sup>Institute for Health Service Research, Peninsula College of Medicine and Dentistry,  
12 University of Exeter, Exeter, UK  
13  
14

15 <sup>2</sup>Centre for Health & Environmental Statistics, University of Plymouth, Plymouth, UK  
16  
17

18 Email addresses:  
19

20 \*JJL: [jennifer.lloyd@pms.ac.uk](mailto:jennifer.lloyd@pms.ac.uk)  
21

22 KMW: [katrina.wyatt@pms.ac.uk](mailto:katrina.wyatt@pms.ac.uk)  
23

24 SC: [siobhan.creanor@plymouth.ac.uk](mailto:siobhan.creanor@plymouth.ac.uk)  
25  
26  
27  
28  
29  
30  
31

32 \*Corresponding author: Tel: 01392 722972 Fax: 01392 421009  
33

34 The Corresponding Author has the right to grant on behalf of all authors and does grant on  
35 behalf of all authors, an exclusive licence (or non-exclusive for government employees) on a  
36 worldwide basis to the BMJ Publishing Group Ltd and its Licensees to permit this article (if  
37 accepted) to be published in Archives of Disease in Childhood and any other BMJPG  
38 products to exploit all subsidiary rights, as set out in our licence  
39  
40  
41  
42  
43  
44  
45  
46  
47  
48  
49

50 Key words

51 Obesity; Prevention; Intervention; Drama; Schools; Children; Exploratory trial  
52

53 Word count 3,429  
54  
55  
56  
57  
58  
59  
60

**ABSTRACT**

**Objectives:** To assess the effect of a novel school-based obesity prevention programme on behavioural and weight status outcomes in English primary school children

**Design:** Exploratory cluster randomised controlled trial of the Healthy Lifestyles Programme (HeLP), involving 4 schools with children aged 9-10 years (n=202). Baseline, 18 and 24 month post intervention height, weight, waist circumference, % body fat, objective physical activity using accelerometry, food intake and TV viewing/screen based activity were assessed. Intention to treat regression analyses (n=187) allowing for clustering were undertaken.

**Intervention:** The Healthy Lifestyle Programme uses a range of school-based activities including lessons, assemblies, parents' evenings, interactive drama workshops and goal setting to engage and support schools, children and their families in healthy lifestyle behaviours.

**Results:** At 18 months follow-up, intervention children had fewer 'negative food markers', consumed less energy dense snacks and more healthy snacks, had more 'positive food markers', had lower mean TV/screen time and spent more time doing Moderate-Vigorous Physical Activity each day than children in the control schools. Intervention children had lower anthropometric measures at 18 and 24 months than control children, with larger differences at 24 months than at 18 months for all measures except percentage body fat sds.

**Conclusion:** Results from this exploratory trial show consistent positive changes in favour of the intervention across all targeted behaviours which, in turn, appear to affect weight status and body shape. A definitive trial is now warranted.

### Article focus

- To present behavioural and weight status outcomes from an exploratory cluster randomised controlled trial of a novel school-based obesity prevention programme with English primary school children
- To present sample size estimates required for a definitive trial of the Programme based on outcome results, attrition rates and estimates of the intraclass correlations of the outcome measures

### Key messages

- HeLP has been developed using behaviour change theory and extensive stakeholder involvement to engage and support children and their families in healthy lifestyles
- Behavioural and weight status outcomes at 18 and 24 months from this exploratory trial (Phase 3 pilot) show consistency in the direction of effects, all in favour of the intervention, demonstrating 'proof of concept'
- Results from the exploratory trial have provided sufficient evidence to support the evaluation of HeLP in a full scale trial

### Strengths and Limitations

Strengths: The HeLP intervention has undergone a systematic development process using research evidence, behavioural theory, stakeholder consultation and piloting. This has enabled the researchers to gain a deeper understanding of the context in which the intervention was to be delivered in order to maximize engagement at all levels. The exploratory trial presented in this paper (phase 3 pilot), has demonstrated that not only is the design of the trial feasible, with outcome data obtained from 92% of the original cohort

1  
2  
3 at 24 months after transition to secondary school, but also that behavioural and weight  
4  
5 status outcome measures at 18 and 24 months show consistency in the direction of effects,  
6  
7  
8 all in favour of the intervention, demonstrating 'proof of concept'. This shows that a  
9  
10 definitive trial of HeLP is both necessary and feasible.  
11  
12

13  
14 Limitations: The study was based in the South West of England which is predominantly  
15  
16 white, and although, there are areas of deprivation, none of the 4 schools, had  $\geq 25\%$  of  
17  
18 children eligible for free school meals (the national average of proportion of children eligible  
19  
20 for free school meals). However, the intervention has been developed to allow the flexibility  
21  
22 and adaptation to ensure it is recognising and responding to the local needs of children and  
23  
24 families from different socio-economic and ethnic groups whilst still maintaining fidelity.  
25  
26 Food intake [1] and TV viewing/screen time [2] were self report and, although children were  
27  
28 asked to sit in their literacy tables so that appropriate support could be provided to each  
29  
30 child during completion, the information children are able to provide is limited. We did,  
31  
32 however, go to great lengths to ensure that the questionnaires were simple and presented  
33  
34 in such a way so as to trigger recall.  
35  
36  
37  
38  
39  
40  
41  
42  
43  
44  
45  
46  
47  
48  
49  
50  
51  
52  
53  
54  
55  
56  
57  
58  
59  
60

## INTRODUCTION

During the last three decades, the prevalence of obesity in children in Europe has risen dramatically [3]. In the UK, The Health Survey for England reported that 19% of girls and 18% of boys aged 11-15 were obese and 34% of girls and 33% of boys were overweight or obese [4]. The National Child Measurement Programme in England (NCMP) reported that by age 10-11 years, one in three children were either overweight or obese [5]. Being overweight in childhood is associated with adverse consequences including metabolic abnormalities, increased risk of Type II diabetes and musculo-skeletal and psychological problems [6]. A recent systematic review showed that the risk of overweight children becoming overweight adults was at least twice as high as for normal weight children [7] and more contemporary data, from a large prospective cohort of children born in the South-West of England in 1991/1992 (ALSPAC), showed that the four year incidence of obesity was higher between the ages of 7 and 11 years than between 11 and 15 years, suggesting that mid to late childhood (around 7-11 years) may merit greater attention in future obesity prevention interventions [8].

Obesity results from an imbalance between consumption and expenditure of energy. Epidemiological studies suggest a number of risk factors, the strongest of which is having one or more overweight parents [9]. There are also strong associations between the risk of overweight and socio-economic status, diet, physical activity levels and other lifestyle factors [10]. At a population level, the consumption of processed and fast food, including sweetened fizzy drinks, has increased while that of fruit and vegetables has declined and portion size in pre-packaged food has increased substantially [11]. In addition, the National

1  
2  
3 Travel Survey [12] has shown that, since the 1970s, children's transport activity has been in  
4  
5 decline.  
6  
7

8  
9  
10 Evidence about the relationship between physical activity, sedentary behaviours and  
11  
12 childhood obesity is scarce with reviews of physical activity and obesity prevention  
13  
14 reporting inconsistent results [13, 14]. Using data from the Avon Longitudinal Study of  
15  
16 Parents and Children (ALSPAC), Riddoch and colleagues found strong associations between  
17  
18 children's fat mass at age 14 and their physical activity at age 12 [15]. Compared to previous  
19  
20 generations, children in the UK spend more time participating in sedentary activities; with  
21  
22 research suggesting that children spend an average of 4.5 hours in screen time a day [16].  
23  
24 Some studies have reported an association between time spent watching television and  
25  
26 obesity [17]. Not only is television viewing a sedentary activity but it is also positively  
27  
28 correlated with total calorific intake [18] and the consumption of snack foods [19].  
29  
30  
31  
32  
33  
34  
35  
36  
37

38 Schools have the potential to play a critical role in the prevention of overweight and obesity  
39  
40 and the more recent development of community-wide multisite approaches often use  
41  
42 school-based interventions as part of the overall programme of events [20, 21]. Schools'  
43  
44 existing organisational, social and communication structures provide opportunities for  
45  
46 regular health education and for the creation of a health enhancing environment and, if  
47  
48 school-based interventions are developed in a systematic way involving stakeholders and  
49  
50 appropriate piloting phases, they have the potential to reach children and their families  
51  
52 across the social spectrum. The most recent systematic review (2008) of controlled trials of  
53  
54 school-based interventions concluded that interventions which aim to increase activity and  
55  
56  
57  
58  
59  
60

1  
2  
3 reduce sedentary behaviour and affect diet may be more effective in preventing children  
4  
5 becoming overweight in the long term [22].  
6  
7  
8  
9

10 The Healthy Lifestyle Programme (HeLP) is an innovative school-based intervention that  
11  
12 aims to deliver a general healthy lifestyle message encouraging a healthy energy balance.  
13  
14

15 The Programme takes a population approach, seeking to change behaviour at a family as  
16  
17 well as at an individual and school level. The development of HeLP followed the MRC  
18  
19 guidance for the development and evaluation of complex interventions [23] involving  
20  
21 careful theoretical derivation of behaviour change techniques [24] and three phases of  
22  
23 iterative pilot work [25]. Phase 3 was the exploratory randomised controlled trial, to assess,  
24  
25 for schools, children and their families: recruitment and retention in control and  
26  
27 intervention schools; feasibility and acceptability of the intervention and of future trial  
28  
29 outcomes measures, and facilitators and barriers to uptake of the intervention. In addition,  
30  
31 data from this trial would help us in calculating the sample size required for a full scale trial.  
32  
33 Here we present the behavioural and weight status outcomes from the exploratory  
34  
35 randomised controlled trial and the estimation of the sample size required for a definitive  
36  
37 evaluation of the Programme.  
38  
39  
40  
41  
42  
43  
44  
45  
46  
47

## 48 **METHODS**

### 49 **Study design**

50  
51 An exploratory cluster randomised controlled trial of the HeLP intervention, in Exeter (a city  
52  
53 in the South West of England) involving 202 9-10 year old children. There is little ethnic mix  
54  
55 in the South West, with the majority of the population being 'white'. Although overall socio-  
56  
57 economic status for the area is higher than average, within Exeter there are some areas with  
58  
59  
60



1  
2  
3 quite severe deprivation. All state Primary and Junior schools in Exeter were eligible to take  
4  
5 part if they had at least one single age year 5 group (9-10 year olds) (i.e. not mixed classes,  
6  
7 8-10 or 9-11 year olds). Schools were recruited via the local network of Primary school head  
8  
9 teachers. Of the 11 eligible schools in Exeter, eight expressed an interest from which four  
10  
11 schools (with a total of 7 Year 5 classes) were randomly selected to participate. Baseline  
12  
13 measures were taken prior to schools being randomised to control or intervention.  
14  
15  
16  
17  
18 Randomisation was undertaken by a researcher independent to the study.  
19  
20  
21  
22

### 23 **Intervention**

24  
25 HeLP is a multi-component 4 phase programme delivered to 9-10 year olds over 3 school  
26  
27 terms (Spring and Summer term of year 5 and Autumn term of year 6). The Programme is  
28  
29 based on the Information, Motivation and Behavioural Skills Model [26] and aims to deliver  
30  
31 a general healthy lifestyle message encouraging a healthy energy balance. Within this  
32  
33 context, three key behaviours are emphasised: a decrease in the consumption of sweetened  
34  
35 fizzy drinks; an increase in the proportion of healthy snacks to unhealthy snacks consumed,  
36  
37 and a reduction in TV viewing and other screen-based activities. These messages are  
38  
39 consistent with the strategies suggested in the UK NICE guidance on the prevention of  
40  
41 overweight and obesity in adults and children [27]. We hypothesise that targeting  
42  
43 information, motivation and behavioural skills will lead to improvements in diet and physical  
44  
45 activity thus preventing excessive weight gain. This process of change may be moderated by  
46  
47 gender, weight status, socio-economic circumstances and school size. Figure 1 presents a  
48  
49 schematic map of the proposed change processes.  
50  
51  
52  
53  
54  
55  
56  
57

58 *Insert Fig 1*  
59  
60

1  
2  
3 An Intervention Mapping (IM) approach [28], involving considerable stakeholder  
4  
5 consultation and pilot work, was undertaken to link theory to specific behaviour change  
6  
7 techniques (BCTs) and methods of delivery [24] that were suitably engaging and compatible  
8  
9 with the existing school curriculum (Table 1).  
10  
11

12  
13 *Insert table 1*  
14

### 15 16 **Outcome measures**

17  
18 Baseline height, weight, waist circumference, % body fat, food intake, TV viewing/screen-  
19  
20 based activity and physical activity were collected at the start of the school year, in the  
21  
22 Autumn term (October/November, 2008) prior to randomisation of schools. These same  
23  
24 measures were then collected 18 months post baseline (June/ July 2009) and  
25  
26 anthropometric measures only were collected 24 months post baseline (October/November  
27  
28 2010), after the children had moved to secondary school.  
29  
30

### 31 32 *Anthropometric*

33  
34 All anthropometric measures were taken by an independent assessor blind to allocation. For  
35  
36 the anthropometric measures children were asked to remove their shoes and socks. Height  
37  
38 was measured using a portable SECA stadiometer (Hamburg, Germany) and recorded to an  
39  
40 accuracy of 1mm. Weight and body fatness was measured using the Tanita SC330 portable  
41  
42 body composition analyser (U.K. Ltd., Middlesex, U.K.). Weight was recorded to within  
43  
44 0.1kg. Body fatness was estimated from leg to leg bioelectrical impedance. Waist  
45  
46 circumference was measured using a non-elastic flexible tape 4cm above the umbilicus.  
47  
48  
49  
50  
51  
52

### 53 54 55 *Behavioural*

56  
57 Food intake was assessed using the adapted version of the validated Food Intake  
58  
59 Questionnaire (FIQ) [1], a recall method which asks whether specific foods were consumed  
60

1  
2  
3 the previous day. Children completed the FIQ twice, during school hours, in order to obtain  
4  
5 a weekday and weekend food intake. These results were then combined and weighted to  
6  
7 calculate the mean number of different healthy snacks (HS), energy dense snacks (EDS);  
8  
9 positive (PM) and negative (NM) foods consumed each day. TV viewing/screen based usage  
10  
11 was assessed using the adapted version of the validated Children's TV Viewing Habits  
12  
13 Questionnaire [2]. Participants were asked to record the time (in minutes) they usually  
14  
15 spent watching TV or doing other leisure time screen-based activities on weekdays before  
16  
17 school, before tea and after tea and on the weekend (Saturday and Sunday morning,  
18  
19 afternoon and evening). The results were then combined and weighted to calculate the  
20  
21 mean time spent watching TV/doing leisure time screen-based activities each day.  
22  
23 Additional information on the number and location of TV sets and rules in the home  
24  
25 regarding TV viewing and screen based usage was also collected.  
26  
27  
28  
29  
30  
31  
32  
33  
34  
35

36 Questionnaires were completed during class time, where children were asked to sit in their  
37  
38 literacy groups. JL instructed the class on how to complete the questionnaires and, with the  
39  
40 class teacher, learning support assistant and an additional researcher, assisted individual  
41  
42 children where necessary. Physical activity was measured in one randomly selected class per  
43  
44 school using a GT1M Actigraph (Actigraph LLC, Pensacola, FL:<http://www.theactigraph.com>)  
45  
46 which children were asked to wear around their waist during waking hours over seven  
47  
48 consecutive days (5 weekdays and one weekend).  
49  
50  
51  
52

### 53 **Data management**

54 Anthropometric and questionnaire data were entered into a specifically designed database.  
55  
56 10% of entries (using a random number generator) were subsequently checked by a second  
57  
58 researcher.  
59  
60

1  
2  
3 The raw accelerometry data from the pre and post time points was processed using kinesoft  
4 software (version 3.3.55) and quality control checks carried out. To be included in the  
5  
6 analysis, participants had to have at least 10 hours of wear time a day on 3 week days and  
7  
8 one weekend day. Days were counted if participants accrued 10 hours of wear time each  
9  
10 day. Periods of non-wear time were classified as 30 mins of 0 counts. Those that failed to  
11  
12 meet the inclusion criteria were excluded from subsequent analysis.  
13  
14  
15  
16  
17

18  
19 Eligible days of data were organised into time spent in each activity intensity per day.  
20

21  
22 Activity intensity categories were classified using the following previously published cut  
23  
24 points (sedentary: 0 to 299; light: 300 to 3580; moderate: 3581 to 6129; vigorous:  $\geq 6130$ )  
25  
26 [29].  
27  
28  
29  
30

### 31 **Statistical analysis**

32  
33 As this was an exploratory study we sought to utilise the results, including the attrition rates  
34  
35 and estimates of the intraclass correlations of the outcome measures, to help us plan a  
36  
37 definitive cluster randomised controlled trial, including estimating the sample size needed  
38  
39 for such a definitive trial.  
40  
41  
42  
43

44  
45 The main analysis of the effect of the exploratory trial was undertaken on an intention-to-  
46  
47 treat basis. As there was only a small number of missing data for some of the outcomes, the  
48  
49 analysis was based on all the available data, with no imputation for missing data. Given  
50  
51 there were only four schools participating in this exploratory trial, only cluster level analyses  
52  
53 were undertaken [30, 31]; this meant that the analyses could not be adjusted for individual-  
54  
55 level covariates (e.g. baseline measures). As there were varying numbers of children in each  
56  
57 school, the analyses were weighted by cluster size [31, 32]; inverse variance weighting was  
58  
59  
60

1  
2  
3 not used, given the uncertainties in estimating the intraclass correlation coefficients.  
4  
5 Differences between the intervention and control groups are presented, together with 95%  
6  
7 confidence intervals. Unadjusted results (i.e. without clustering being taken into account)  
8  
9 are also presented, in order to allow comparison of the precision of the estimates of the  
10  
11 effect of the intervention. Intraclass correlation coefficients (and 95% confidence intervals)  
12  
13 were calculated for selected outcomes. All analyses were undertaken in STATA version 11.1.  
14  
15  
16  
17  
18  
19

## 20 RESULTS

### 21 Recruitment and participant characteristics at baseline

22  
23 Figure 2 shows the flow of participants through the trial [33] and follow up of  
24  
25 anthropometric measures at 18 and 24 months. The intervention group consisted of two  
26  
27 primary schools, one with 170 children on the school roll (13% eligible for free school meals  
28  
29 (FSM) and one larger primary school with 384 children on the roll (2.6% FSM). The control  
30  
31 group consisted of two primary schools, one with 317 on roll (14% FSM) and the other with  
32  
33 364 on roll (6% FSM).  
34  
35  
36  
37  
38  
39

40  
41 Table 2 shows that the intervention and control groups were generally comparable at  
42  
43 baseline with the percentages of children overweight/obese being 24% and 26%  
44  
45 respectively [34]. Whilst there was higher percentage of obese and a higher percentage  
46  
47 body fat ( $\geq 85^{\text{th}}$  and  $< 95^{\text{th}}$  centile) in the control schools, the continuous measurements had  
48  
49 very similar means and ranges. Food intake on all categories were similar for both control  
50  
51 and intervention groups, with an approximate ratio for HS:EDS and PM:NM of 1:1.  
52  
53 Children's mean TV viewing/screen time was 2.6 hours a day, which mirrors national data  
54  
55 for 4-15 years [16], however the percentage of children who had televisions in their  
56  
57 bedrooms and no rules regarding the amount of TV/screen time was higher in the control  
58  
59  
60

1  
2  
3 group compared to the intervention group. Both groups spent a similar amount of time per  
4  
5 day in sedentary activities but differed slightly in time spent in MVPA, however this varied  
6  
7 greatly between children (range; 13.7-104 mins). Mean sedentary time for all children was  
8  
9 16.2 hours/day.  
10  
11

12  
13  
14  
15 *Insert Fig 2*  
16

17  
18  
19 *Insert Table 2*  
20  
21

## 22 **Intervention and control group comparisons at follow-up**

### 23 *Anthropometric*

24  
25 Anthropometric follow up data was collected for 193 and 187 participants at 18 and 24  
26  
27 months respectively (94% and 92% of the original cohort of 202 children).  
28  
29

30  
31 Table 3 shows the comparisons of the main outcomes at 18 and 24 month follow-ups  
32  
33 between the children in the intervention schools and control schools. Children in the  
34  
35 intervention schools typically fared better than those in the control schools having, on  
36  
37 average, lower anthropometric measures at 18 and 24 months with larger differences at 24  
38  
39 months than at 18 months for all measures except percentage Body Fat sds. At 18 months,  
40  
41 the proportion of overweight and obese children increased in the control schools from 26%  
42  
43 (31/122) to 32% (38/119) but remained at 24% (18/74) in the intervention schools. At 24  
44  
45 months the proportion of overweight/obese children remained at 32% (36/114) in the  
46  
47 control schools and decreased slightly to 22% (16/73) in the intervention schools. The waist  
48  
49 circumference data show similar proportions at baseline ( $\geq 85^{\text{th}}$  centile) shifting to an 8.7 %  
50  
51 difference in favour of the intervention at 24 months.  
52  
53  
54  
55  
56  
57  
58  
59  
60

### *Behavioural*

At 18 months follow-up, children in the intervention schools had fewer 'negative food markers', consumed less energy dense snacks and more healthy snacks, had more 'positive food markers', had lower mean TV/screen time and on average spent more time doing Moderate-Vigorous Physical Activity each day than children in the control schools.

As expected, the 95% confidence intervals were narrower for all outcomes in the unadjusted results, when the clustering within schools was (incorrectly) not accounted for in the analyses.

### *Estimation of intraclass correlation coefficients*

The intraclass correlation coefficient (ICC) for BMI at 24 months for this exploratory trial was estimated to be 0.04 (95% CI: 0.00 to 0.15) and for BMI sds at 24 months was 0.06 (0.00 to 0.19). As four clusters are insufficient to precisely estimate the intraclass correlation coefficients, we have looked at the effect of using a range of ICCs, based on both our pilot data and other published data in this field [35-37] in our sample size calculations for a definitive randomised controlled trial (see Table 4).

### *Estimation of sample size required for definitive trial*

Statistical efficiency will be maximised in a full trial by analysing BMI sds and adjusting for baseline values, which will reduce the standard error of the estimates of the difference between intervention and control. In this exploratory trial, the correlation between baseline and 24 month BMI sds was 0.93 (95% CI: 0.92 to 0.96).

The sample size estimates shown are based on recruiting 26 schools, each with an average of 50 children. Using BMI sds as the primary outcome measure at 24 months follow-up,

1  
2  
3 Table 4 shows possible sample sizes required for a definitive trial, for a number of possible  
4 scenarios (varying possible effect sizes and ICCs). All sample size calculations are two-sided,  
5  
6 significance level of 5%, with an adjustment for a more conservative reduction in variability  
7  
8 (assuming a correlation between baseline and 24 month measures of 0.8) and assuming a  
9  
10 loss to follow-up of 20%.  
11  
12  
13  
14  
15  
16  
17

18 A difference in BMI sds of 0.25 has been shown to be a meaningful change, impacting on  
19  
20 improvement on adiposity and metabolic health [38]. Using a significance level of 5%, we  
21  
22 would need to recruit 1267 children from 26 schools to be able to detect a true difference of  
23  
24 at least 0.25, with 90% power, allowing for a conservative attrition rate of 20%, assuming an  
25  
26 ICC of 0.03.  
27  
28  
29  
30  
31  
32

### 33 **DISCUSSION**

34 We have shown over three phases of piloting that HeLP is feasible and acceptable to  
35  
36 schools, children and their families [25] and that the study design is feasible for a definitive  
37  
38 evaluation. We were able to recruit and retain schools and children throughout the study,  
39  
40 obtaining follow up data from 92% of the original cohort at 24 months, after the children  
41  
42 had moved on to secondary school. In addition, we obtained useable accelerometry data  
43  
44 from 85% of the children at 18 months. We are aware that with a sample size of 202  
45  
46 children and only 4 schools, the trial was not powered to be able to provide precise  
47  
48 estimates of the effect of the intervention. Analyses were undertaken at cluster-level only,  
49  
50 thus unable to be adjusted for individual-level covariates (such as measures at baseline),  
51  
52 however, both behavioural and anthropometric outcome measures at 18 and 24 months  
53  
54  
55  
56  
57  
58  
59  
60



1  
2  
3 showed consistency in the direction of effects, all in favour of the intervention,  
4  
5 demonstrating 'proof of concept'.  
6  
7  
8  
9

10 Although estimates of the differences between intervention and control schools were  
11 imprecise, it is encouraging to see that there was a consistent positive impact on the  
12 behaviours targeted (snacking, screen time and physical activity) and on anthropometric  
13 values. When we began the development of this Programme back in 2005, we believed that  
14 the cumulative effect of making small, sustainable changes in multiple behaviours related to  
15 the energy balance had the potential to significantly impact on weight status. Interestingly,  
16 there were larger differences at 24 months than at 18 months for all measures except  
17 percentage body fat sds, which is encouraging, suggesting the potential of the Programme  
18 to support children and their families to sustain these lifestyle changes in the longer term.  
19  
20  
21  
22  
23  
24  
25  
26  
27  
28  
29  
30  
31  
32  
33

34  
35 Further evidence of 'proof of concept' is shown by looking at the weight status proportions.  
36  
37 Whilst the proportion of overweight and obese were similar at baseline in both groups, in  
38 the control schools, this increased to 32% at 18 months (matching our national data for  
39 children of the same age) but remained at baseline levels in the intervention schools at both  
40 the 18 and 24 month follow up, suggesting that the intervention may have the effect of  
41 preventing the shift from normal to overweight or overweight to obese that occurs during  
42 this time. These results are supported by recent tracking data from England showing that  
43 the greatest increases in weight in a non obese sample are between the ages of 7 and 11  
44 years [8]. Our waist circumference data is particularly striking, showing a reduction of  
45 almost 10% in those with a waist circumference greater than the 85<sup>th</sup> centile in the  
46 intervention group at 24 months, whilst remaining at baseline levels in the control group.  
47  
48  
49  
50  
51  
52  
53  
54  
55  
56  
57  
58  
59  
60

1  
2  
3  
4  
5  
6 In the planned definitive RCT, more sophisticated statistical analyses will be able to be  
7  
8 undertaken at the individual level and, by incorporating individual level covariates, the  
9  
10 precision of effect of the intervention will be further improved. Despite being unable to do  
11  
12 this for the current study, the data obtained from this study has enabled us to calculate a  
13  
14 likely sample size required for the definitive evaluation.  
15  
16  
17  
18  
19  
20

## 21 **CONCLUSION**

22  
23 Situating an intervention within a school is not sufficient within itself to generate sustained  
24  
25 behaviour change. It is critical to engage and motivate children and to generate a supportive  
26  
27 social context involving the whole school as well as children's parents [39]. HeLP is unique in  
28  
29 that it uses highly inclusive and interactive delivery methods for a range of behaviour  
30  
31 change techniques to encourage identification with and ownership of the key messages,  
32  
33 ensuring that children have the information, motivation, behavioural skills and support  
34  
35 necessary to initiate and sustain change. Results from this exploratory trial show positive  
36  
37 changes in favour of the intervention across all targeted behaviours (snacking, screen time  
38  
39 and physical activity). Furthermore, these changes appear to have a sustained effect on  
40  
41 children's weight status and body shape. A definitive trial is now warranted.  
42  
43  
44  
45  
46  
47  
48  
49  
50  
51  
52  
53  
54  
55  
56  
57  
58  
59  
60

**Table 1** Intervention phases, change targets, BCTs and the method and agent of delivery.

| Intervention Phase                                                                           | Change targets                                                                                        | Behaviour change techniques                                                                                                                                                    | Method (Frequency) and agent of delivery                                                                                                 |                                                   |
|----------------------------------------------------------------------------------------------|-------------------------------------------------------------------------------------------------------|--------------------------------------------------------------------------------------------------------------------------------------------------------------------------------|------------------------------------------------------------------------------------------------------------------------------------------|---------------------------------------------------|
| <b>Phase 1</b>                                                                               | Establish relationships with schools, children and families                                           | Provide information<br>Creating social norms                                                                                                                                   | Whole school assembly (1)                                                                                                                | HeLP Coordinators                                 |
| <b>Creating a supportive context</b>                                                         | Raise awareness and increase knowledge                                                                | Exchange information                                                                                                                                                           | Newsletter articles (3)                                                                                                                  | HeLP Coordinators                                 |
| Spring term (Yr 5)                                                                           | Promote positive attitudes and norms towards healthy eating and physical activity                     | Communicate messages implying positive evaluations and norms.                                                                                                                  | Activity workshops (2) (parents observe)                                                                                                 | Professional sportsmen/dancers                    |
|                                                                                              | Increase self efficacy for behaviour change                                                           | Role modelling<br>Skill building                                                                                                                                               | Parents' evening (1) involving child performances                                                                                        | Class teachers/ HeLP Coordinator /Drama group     |
| <b>Phase 2</b>                                                                               | Strengthen relationships with schools, children and families                                          | Exchange information                                                                                                                                                           | *PSHE lessons (5) (morning)                                                                                                              | Class teacher                                     |
| <b>Intensive Healthy Lifestyles Week – one week</b>                                          | Increase knowledge<br>Increase self awareness<br>Increase self efficacy                               | Decision balance<br>Problem solving tasks<br>Modelling/demonstrating behaviour                                                                                                 | §Drama (5) (afternoon) (forum theatre; role play; food tasting, discussions, games etc)                                                  | Drama group                                       |
| Summer term (Yr 5)                                                                           | Develop communication and problem solving skills<br>Increase social support (school, peer and family) | Providing role models<br>Communication skills training                                                                                                                         |                                                                                                                                          |                                                   |
| <b>Phase 3</b>                                                                               | Increase awareness of own behaviour                                                                   | Self monitoring                                                                                                                                                                | Self reflection questionnaire (1)                                                                                                        | HeLP Coordinator/<br>Class teacher                |
| <b>Personal Goal Setting with Parental Support-</b><br>goals set during week following drama | Increase self efficacy for change<br>Develop planning skills<br>Increase parental support             | Identification and resolution of barriers<br>Provide models of others setting goals<br>Prompt intention and specific goal formation<br>Problem solving<br>Behavioural contract | Goal setting sheet to go home to parents to complete with child.<br><br>1:1 goal setting interview (1) (goals sent home to parents)      | HeLP Coordinator /Parents<br><br>HeLP Coordinator |
| Summer term (Yr 5)                                                                           |                                                                                                       | Prompt identification as a role model                                                                                                                                          | Parent's evening (1) (child involvement – Forum Theatre)                                                                                 | HeLP Coordinator /Drama group                     |
| <b>Phase 4</b>                                                                               | Increase self awareness and prioritise healthy goals.<br>Consolidate social support.                  | Prompt self monitoring and practice<br>Provide social approval.                                                                                                                | Newsletter articles (2)                                                                                                                  | HeLP Coordinator                                  |
| <b>Reinforcement Activities</b>                                                              | Develop monitoring and coping skills<br>Increase parental support                                     | Prompt self monitoring<br>Prompt intention formation<br>Follow up prompts                                                                                                      | Drama workshop (1)<br>*PSHE lesson (1)                                                                                                   | Drama group<br>Class teacher                      |
| Autumn term (Yr 6)                                                                           |                                                                                                       | Prompt practice                                                                                                                                                                | Class to deliver assembly about the project to rest of school (1) (parents invited to attend)                                            | Children to all other year groups in the school   |
|                                                                                              |                                                                                                       | Prompt review of behavioural goals<br>Prompt barrier identification and resolution<br>Coping plans                                                                             | 1-to-1 goal supporting interview to discuss facilitators/barriers and to plan new coping strategies (renewed goals sent home to parents) | HeLP Coordinator                                  |

\* PSHE – Personal, Social and Health Education

§The drama framework includes 4 characters, each represented by one of the actors, whose attributes related to the three key behaviours. Children choose which of the characters they most resemble then work with that actor to help the character learn to change their behaviour

**Table 2** Baseline characteristics of children allocated to the intervention and control

|                                                                                                     | Intervention<br>(n=80)       | Control<br>(n=122)           | Total<br>(n=202)             |
|-----------------------------------------------------------------------------------------------------|------------------------------|------------------------------|------------------------------|
| <b>Demographics</b>                                                                                 |                              |                              |                              |
| Age, years, mean (SD)                                                                               | 9.69 (0.3)                   | 9.69 (0.3)                   | 9.69 (0.3)                   |
| <b>Sex</b>                                                                                          |                              |                              |                              |
| % (n) Male                                                                                          | 50.0 (40)                    | 50.0 (61)                    | 50.0 (101)                   |
| % (n) Female                                                                                        | 50.0 (40)                    | 50.0 (61)                    | 50.0 (101)                   |
| Total % of all children in the schools eligible for free school meals                               | 5.7                          | 9.7                          | 7.9                          |
| <b>Anthropometric Measures</b>                                                                      |                              |                              |                              |
| % (n) Overweight ( $\geq 85^{\text{th}}$ and $< 95^{\text{th}}$ centile) <sup>a</sup>               | 10.5 (8)                     | 7.6 (9)                      | 8.7 (17)                     |
| % (n) Obese ( $\geq 95^{\text{th}}$ centile)                                                        | 13.2 (10)                    | 18.5 (22)                    | 16.4 (32)                    |
| % (n) Underweight ( $\leq 2^{\text{nd}}$ centile)                                                   | 1.3 (1)                      | 0.0 (0)                      | 0.5 (1)                      |
| % (n) with Bodyfat ( $\geq 85^{\text{th}}$ and $< 95^{\text{th}}$ centile) <sup>b</sup>             | 5.3 (4)                      | 11.8 (14)                    | 9.2 (18)                     |
| % (n) with Bodyfat $\geq 95^{\text{th}}$ centile                                                    | 11.8 (9)                     | 10.1 (12)                    | 10.8 (21)                    |
| % (n) with Bodyfat $\leq 2^{\text{nd}}$ centile                                                     | 19.7 (15)                    | 14.3 (17)                    | 16.4 (32)                    |
| % (n) with Waist Circumference ( $\geq 85^{\text{th}}$ and $< 95^{\text{th}}$ centile) <sup>c</sup> | 21.3 (17)                    | 21.3 (26)                    | 21.3 (43)                    |
| % (n) with Waist Circumference $\geq 95^{\text{th}}$ centile                                        | 21.3 (17)                    | 21.3 (26)                    | 21.3 (43)                    |
| Mean (sd) BMI<br>[range]                                                                            | 17.4 (2.6)<br>[13.3 to 25.4] | 17.8 (2.8)<br>[13.7 to 25.1] | 17.6 (2.7)<br>[13.3 to 25.4] |
| Mean (sd) BMI sds<br>[range]                                                                        | 0.3 (1.1)<br>[-2.3 to 2.5]   | 0.4 (1.1)<br>[-2.0 to 2.9]   | 0.3 (1.1)<br>[-2.3 to 2.9]   |
| Mean (sd) % Bodyfat<br>[range]                                                                      | 19.3 (6.8)<br>[3.0 to 37.4]  | 20.0 (6.7)<br>[7.6 to 36.8]  | 19.71 (6.8)<br>[3.0 to 37.4] |
| Mean (sd) % Bodyfat sds<br>[range]                                                                  | -0.9 (3.4)<br>[-25.8 to 2.3] | -0.5 (1.7)<br>[-6.5 to 2.4]  | -0.6 (2.5)<br>[-25.8 to 2.4] |
| Mean (sd) Waist Circumference (cm)<br>[range]                                                       | 62.0 (6.5)<br>[50 to 81]     | 62.6 (7.0)<br>[52 to 83]     | 62.3 (6.8)<br>[50 to 83]     |
| Mean (sd) Waist circumference sds<br>[range]                                                        | 0.8 (1.0)<br>[-1.9 to 3.0]   | 0.91 (1.0)<br>[-1.2 to 3.2]  | 0.9 (1.0)<br>[-1.9 to 3.2]   |
| <b>Food Intake*(sd)</b>                                                                             |                              |                              |                              |
| Mean (sd) Energy Dense Snacks (EDS)<br>[range]                                                      | 4.2 (2.2)<br>[0.0 to 10.7]   | 4.1 (2.1)<br>[0.3 to 11.2]   | 4.2 (2.1)<br>[0.0 to 11.2]   |
| Mean (sd) Healthy Snacks (HS)<br>[range]                                                            | 3.2 (1.6)<br>[0.3 to 8.4]    | 3.4 (1.7)<br>[0.0 to 8.0]    | 3.4 (1.7)<br>[0.0 to 8.4]    |
| Mean (sd) Positive Food Markers (PM)<br>[range]                                                     | 7.3 (2.9)<br>[2.6 to 15.0]   | 7.6 (3.3)<br>[2.3 to 20.3]   | 7.5 (3.1)<br>[2.3 to 20.3]   |
| Mean (sd) Negative Food Markers (NM)<br>[range]                                                     | 6.8 (3.3)<br>[1.4 to 16.6]   | 6.8 (3.2)<br>[0.3 to 20.2]   | 6.8 (3.2)<br>[0.3 to 20.2]   |
| <b>TV/screen viewing</b>                                                                            |                              |                              |                              |
| Mean (sd) TV/screen viewing (hours/day)<br>[range]                                                  | 2.5 (1.7)<br>[0.1 to 7.9]    | 2.7 (1.7)<br>[0.3 to 8.4]    | 2.6 (1.7)<br>[0.1 to 8.4]    |
| % (n) with TV in bedroom                                                                            | 45.6 (36)                    | 59.8 (73)                    | 54.2 (109)                   |
| % (n) with no rules re TV/screen time                                                               | 39.2 (31)                    | 33.9 (40)                    | 36.0 (71)                    |

|                                             |                               |                                |                                |
|---------------------------------------------|-------------------------------|--------------------------------|--------------------------------|
| <b>Physical activity (mean time/day)</b>    |                               |                                |                                |
| Moderate-Vigorous PA/day (mins)<br>[range]  | 36.7 (12.0)<br>[13.7 to 70.0] | 49.5 (20.0)<br>[18.1 to 104.4] | 43.6 (17.9)<br>[13.7 to 104.4] |
| Sedentary Activities/day (hours)<br>[range] | 16.2 (1.6)<br>[9.8 to 18.7]   | 16.4 (1.9)<br>[10.6 to 19.2]   | 16.2 (1.9)<br>[9.3 to 19.2]    |

\*Refers to the number of different EDS/HS/PM/NM consumed in a day

a [34]

b [40]

c [41]

**Table 3:** Difference in outcomes at 18 and 24 months follow up of children allocated to the intervention and control groups.

| Outcome                                                     | Mean difference (Intervention minus Control) (95% CI) |                           |                           |                           |
|-------------------------------------------------------------|-------------------------------------------------------|---------------------------|---------------------------|---------------------------|
|                                                             | 18 months                                             |                           | 24 months                 |                           |
|                                                             | Unadjusted                                            | Adjusted for clustering   | Unadjusted                | Adjusted for clustering   |
| <b>BMI</b>                                                  | -0.95<br>(-1.88 to -0.02)                             | -0.95<br>(-3.79 to 1.90)  | -1.16<br>(-2.15 to -0.18) | -1.16<br>(-3.82 to 1.49)  |
| <b>BMI sds</b>                                              | -0.38<br>(-0.74 to -0.02)                             | -0.38<br>(-1.65 to 0.89)  | -0.45<br>(-0.82 to -0.08) | -0.45<br>(-1.71 to 0.81)  |
| <b>%Body fat</b>                                            | -0.83<br>(-3.01 to 1.36)                              | -0.83<br>(-6.26 to 4.60)  | -1.28<br>(-3.60 to 1.05)  | -1.28<br>(-8.69 to 6.14)  |
| <b>%Body fat sds</b>                                        | -0.33<br>(-1.04 to 0.38)                              | -0.33<br>(-2.52 to 1.85)  | -0.21<br>(-0.85 to 0.42)  | -0.21<br>(-2.45 to 2.03)  |
| <b>Waist circumference (cm)</b>                             | -2.01<br>(-4.23 to 0.21)                              | -2.01<br>(-9.54 to 5.52)  | -2.97<br>(-5.36 to -0.59) | -2.97<br>(-10.30 to 4.35) |
| <b>Waist circumference sds</b>                              | -0.32<br>(-0.63 to -0.01)                             | -0.32<br>(-1.52 to 0.87)  | -0.46<br>(-0.79 to -0.13) | -0.46<br>(-1.72 to 0.80)  |
| <b>% with BMI ≥85<sup>th</sup> centile</b>                  | -7.6<br>(-20.5 to 5.3)                                | -7.6<br>(-49.4 to 34.2)   | -9.7<br>(-22.4 to 3.1)    | -9.7<br>(-27.8 to 8.5)    |
| <b>% with %Body fat ≥ 85<sup>th</sup> centile obese</b>     | -5.5<br>(-15.6 to 4.6)                                | -5.5<br>(-31.8 to 20.9)   | -6.4<br>(-17.8 to 5.1)    | -6.4<br>(-34.9 to 22.1)   |
| <b>% with Waist circumference ≥ 85<sup>th</sup> centile</b> | -5.9<br>(-20.1 to 8.3)                                | -5.9<br>(-50.7 to 39.0)   | -8.7<br>(-22.9 to 5.4)    | -8.7<br>(-58.9 to 41.4)   |
| <b>Energy dense snacks (EDS)</b>                            | -0.28<br>(-0.83 to 0.27)                              | -0.28<br>(-0.83 to 0.27)  | -                         | -                         |
| <b>Healthy snacks (HS)</b>                                  | 0.47<br>(0.02 to 0.92)                                | 0.47<br>(-1.29 to 2.23)   | -                         | -                         |
| <b>Positive food markers (PM)</b>                           | 0.38<br>(-0.37 to 1.13)                               | 0.38<br>(-1.55 to 2.31)   | -                         | -                         |
| <b>Negative food markers (NM)</b>                           | -0.69<br>(-1.52 to 0.15)                              | -0.69<br>(-1.70 to 0.33)  | -                         | -                         |
| <b>Duration of TV viewing (hours/day)</b>                   | -0.41<br>(-0.91 to 0.09)                              | -0.41<br>(-1.28 to 0.46)  | -                         | -                         |
| <b>Sedentary Activities/day (hours)</b>                     | -0.04<br>(-1.09 to 1.01)                              | -0.04<br>(-1.91 to 1.84)  | -                         | -                         |
| <b>Moderate-Vigorous PA/day (mins)</b>                      | 5.67<br>(0.20 to 11.15)                               | 5.67<br>(-12.59 to 23.93) | -                         | -                         |

**Table 4:** Sample size calculations for a definite RCT with primary outcome of BMI sds at 24 months under different assumptions

|      | 80% Power                     |      |      | 90% Power                     |      |      |
|------|-------------------------------|------|------|-------------------------------|------|------|
|      | Minimum Difference Detectable |      |      | Minimum Difference Detectable |      |      |
| ICC  | 0.25                          | 0.30 | 0.50 | 0.25                          | 0.30 | 0.50 |
| 0.01 | 571                           | 397  | 145  | 764                           | 531  | 193  |
| 0.03 | 947                           | 658  | 240  | 1267                          | 880  | 320  |
| 0.06 | 1511                          | 1050 | 383  | 2021                          | 1404 | 511  |
| 0.10 | 2262                          | 1572 | 573  | 3027                          | 2103 | 765  |

<sup>1</sup>All numbers are the total number of children required to be recruited, assuming 50 children per school and a loss to follow up at 24 months of 20%.

<sup>2</sup>The calculations take into account the reduction in variability associated with adjusting for baseline BMI sds, conservatively assuming the correlation between baseline and 24 months data to be 0.8 (in our pilot study this correlation was 0.93).

<sup>3</sup>This is the sample size required to detect a true minimal difference in BMI sds of 0.25, 0.3 or 0.5, assuming the standard deviation is 1.3 (based on our pilot data).

**Acknowledgements:** The authors are very grateful to the staff, pupils and parents of the 4 participating schools, who gave up their time for the study. We would also like to acknowledge Sandy Akerman (Headbangers Theatre Company) who supported the design of the drama component of the intervention and Stuart Logan who helped design the study and secure funding.

**Competing interests:** None

**Funding:** The Exploratory trial was funded by the NIHR Research for Patient Benefit (RfPB) Programme. JL and KW were partially supported by PenCLAHRC, the National Institute for Health Research (NIHR) CLAHRC for the Southwest Peninsula. This paper presents independent research commissioned by the National Institute for Health Research (NIHR). The views expressed are those of the author(s) and not necessarily those of the NHS, the NIHR or the Department of Health.

1  
2  
3  
4  
5  
6 **Ethics approval:** Ethical approval was granted from the Peninsula College of Medicine and  
7  
8 Dentistry Ethics Committee in 2008.  
9

10  
11  
12  
13 **Author contribution:** JL drafted the manuscript with KW and SC providing critical revision.  
14  
15  
16 SC carried out the statistical analysis and drafted this section of the manuscript. JL  
17  
18 developed and supported the design and production of the intervention materials,  
19  
20 coordinated the implementation of the intervention and the collection of measurements at  
21  
22 baseline, 18 and 24 months. JL, KW and SL designed the study and obtained funding. JL will  
23  
24 act as guarantor of the paper  
25  
26  
27

## 28 **References**

- 31 1. Johnson B, Hackett AF. Eating habits of 11–14-year-old schoolchildren living in less affluent  
32 areas of Liverpool, UK. *J Hum Nutr Diet* 1997;**10**:135-44.
- 33 2. Owens J, Maxim R, McGuinn M, et al. Television-viewing Habits and Sleep Disturbance in  
34 School Children. *Pediatrics* 1999;**104**:e27.
- 35 3. Jackson-Leach R, Lobstein T. Estimated burden of paediatric obesity and co-morbidities in  
36 Europe. Part 1. The increase in the prevalence of child obesity in Europe is itself increasing. *Int J*  
37 *Pediatr Obes* 2006;**1**:26-32.
- 38 4. The NHS Information centre. Health Survey for England - 2008 Trend Tables. London: 2009.
- 39 5. National Child Measurement Programme. Results from the School Year 2009/10 Oxford:  
40 2010.
- 41 6. Gunnell DJ, Frankel SJ, Nanchahal K, et al. Childhood obesity and adult cardiovascular  
42 mortality: a 57-y follow-up study based on the Boyd Orr cohort. *Am J Clin Nutr* 1998;**67**:1111-8.
- 43 7. Singh AS, Mulder C, Twisk JWR, et al. Tracking of childhood overweight into adulthood: a  
44 systematic review of the literature. *Obes Rev* 2008;**9**:474-88.
- 45 8. Hughes AR, Sherriff A, Lawlor DA, et al. Incidence of obesity during childhood and  
46 adolescence in a large contemporary cohort. *Prev Med* 2011;**52**:300-4.
- 47 9. Lake JK, Power C, Cole TJ. Child to adult body mass index in the 1958 British birth cohort:  
48 associations with parental obesity. *Arch Dis Child* 1997;**77**:376-80.
- 49 10. Li L, Law C, Lo Conte R, et al. Intergenerational influences on childhood body mass index: the  
50 effect of parental body mass index trajectories. *Am J Clin Nutr* 2009;**89**:551-7.
- 51 11. Nielsen SJ, Popkin BM. Patterns and trends in food portion sizes, 1977-1998. *JAMA*  
52 2003;**289**:450-3.
- 53 12. National Travel Survey. Trends in personal travel trips, distance travelled and time taken per  
54 person per year: Great Britain, since 1972/73. London: 2010.
- 55 13. Molnár D, Livingstone B. Physical activity in relation to overweight and obesity in children  
56 and adolescents. *Eur J Pediatr* 2000;**159**:S45-S55.
- 57 14. Wareham N. Physical activity and obesity prevention. *Obes Rev* 2007;**8 Suppl 1**:109-14.  
58  
59  
60

15. Riddoch CJ, Leary SD, Ness AR, et al. Prospective associations between objective measures of physical activity and fat mass in 12-14 year old children: the Avon Longitudinal Study of Parents and Children (ALSPAC). *BMJ* 2009;**339**.
16. Childwise. The Childwise Monitor Trends report 2010/11. Norwich: 2011.
17. Marshall SJ, Biddle SJ, Gorely T, et al. Relationships between media use, body fatness and physical activity in children and youth: a meta-analysis. *Int J Obes Relat Metab Disord* 2004;**28**:1238-46.
18. Wiecha JL, Peterson KE, Ludwig DS, et al. When Children Eat What They Watch: Impact of Television Viewing on Dietary Intake in Youth. *Arch Pediatr Adolesc Med* 2006;**160**:436-42.
19. Halford JCG, Gillespie J, Brown V, et al. Effect of television advertisements for foods on food consumption in children. *Appetite* 2004;**42**:221-5.
20. de Silva-Sanigorski A, Bolton K, Haby M, et al. Scaling up community-based obesity prevention in Australia: Background and evaluation design of the Health Promoting Communities: Being Active Eating Well initiative. *BMC Public Health* 2010;**10**:1-7.
21. de Silva-Sanigorski AM, Bell AC, Kremer P, et al. Reducing obesity in early childhood: results from Romp & Chomp, an Australian community-wide intervention program. *Am J Clin Nutr* 2010;**91**:831-40.
22. Brown T, Summerbell C. Systematic review of school-based interventions that focus on changing dietary intake and physical activity levels to prevent childhood obesity: an update to the obesity guidance produced by the National Institute for Health and Clinical Excellence. *Obes Rev* 2009;**10**:110-41.
23. Craig P, Dieppe P, Macintyre S, et al. Developing and evaluating complex interventions: the new Medical Research Council guidance. *BMJ* 2008;**337**:a1655.
24. Lloyd JJ, Logan S, Greaves CJ, et al. Evidence, Theory and Context - Using intervention mapping to develop a school-based intervention to prevent obesity in children. *Int J Behav Nutr Phys Act* 2011;**8**:73.
25. Wyatt KM, Lloyd JJ, Creanor S, et al. The development, feasibility and acceptability of a school-based obesity prevention programme: results from three phases of piloting. *BMJ Open* 2011. <http://bmjopen.bmj.com/content/early/2011/05/23/bmjopen-2010-000026.abstract> (accessed 13 September 2011).
26. Fisher JD, Fisher WA. The information-motivation-behavioral skills model. In: DiClemente R, Crosby R, Kegler M, eds. Emerging theories in health promotion practice and research. San Francisco: Jossey-Bass 2002:40-70.
27. NICE. Obesity: the prevention, identification, assessment and management of overweight and obesity in adults and children. London: NICE 2006.
28. Bartholomew LK. Planning health promotion programs: an intervention mapping approach. San Francisco: Jossey-Bass 2006:171-459.
29. Stone MR, Rowlands AV, Eston RG. Characteristics of the activity pattern in normal weight and overweight boys. *Prev Med* 2009;**49**:205-8.
30. Kerry SM, Bland JM. Trials which randomize practices I: how should they be analysed? *Family Practice* 1998;**15**:80-3.
31. Donner A, Klar N. Design and analysis of cluster randomization trials in health research. London: Arnold 2000:1-178.
32. Bland JM, Kerry SM. Weighted comparison of means. *BMJ* 1998;**316**:129.
33. Campbell M, Elbourne D, Altman D. CONSORT statement: extension to cluster randomised trials. *BMJ* 2004;**328**:702 - 8.
34. Cole TJ, Freeman JV, Preece MA. Body mass index reference curves for the UK, 1990. *Arch Dis Child* 1995;**73**:25-9.
35. Taylor RW, McAuley KA, Barbezat W, et al. APPLE Project: 2-y findings of a community-based obesity prevention program in primary school age children. *Am J Clin Nutr* 2007;**86**:735-42.



- 1  
2  
3  
4  
5  
6  
7  
8  
9  
10  
11  
12  
13  
14  
15  
16  
17  
18  
19  
20  
21  
22  
23  
24  
25  
26  
27  
28  
29  
30  
31  
32  
33  
34  
35  
36  
37  
38  
39  
40  
41  
42  
43  
44  
45  
46  
47  
48  
49  
50  
51  
52  
53  
54  
55  
56  
57  
58  
59  
60
36. Gortmaker SL, Peterson K, Wiecha J, et al. Reducing obesity via a school-based interdisciplinary intervention among youth: Planet Health. *Arch Pediatr Adolesc Med* 1999;**153**:409-18.
37. Caballero B, Clay T, Davis SM, et al. Pathways: a school-based, randomized controlled trial for the prevention of obesity in American Indian schoolchildren. *Am J Clin Nutr* 2003;**78**:1030-8.
38. Ford AL, Hunt LP, Cooper A, et al. What reduction in BMI SDS is required in obese adolescents to improve body composition and cardiometabolic health? *Arch Dis Child* 2009.
39. Foresight. Tackling obesities: future choices-project report. London: The Stationery Office 2007.
40. McCarthy HD, Cole TJ, Fry T, et al. Body fat reference curves for children. *Int J Obes* 2006;**30**:598-602.
41. McCarthy HD, Jarrett KV, Crawley HF. The development of waist circumference percentiles in British children aged 5.0-16.9 y. *Eur J Clin Nutr* 2001;**55**:902-7.

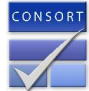

## CONSORT 2010 checklist of information to include when reporting a randomised trial\*

| Section/Topic                    | Item No | Checklist item                                                                                                                                                                              | Reported on page No |
|----------------------------------|---------|---------------------------------------------------------------------------------------------------------------------------------------------------------------------------------------------|---------------------|
| <b>Title and abstract</b>        |         |                                                                                                                                                                                             |                     |
|                                  | 1a      | Identification as a randomised trial in the title                                                                                                                                           | 2                   |
|                                  | 1b      | Structured summary of trial design, methods, results, and conclusions (for specific guidance see CONSORT for abstracts)                                                                     | 2                   |
| <b>Introduction</b>              |         |                                                                                                                                                                                             |                     |
| Background and objectives        | 2a      | Scientific background and explanation of rationale                                                                                                                                          | 4-6                 |
|                                  | 2b      | Specific objectives or hypotheses                                                                                                                                                           | 7                   |
| <b>Methods</b>                   |         |                                                                                                                                                                                             |                     |
| Trial design                     | 3a      | Description of trial design (such as parallel, factorial) including allocation ratio                                                                                                        | 7                   |
|                                  | 3b      | Important changes to methods after trial commencement (such as eligibility criteria), with reasons                                                                                          | n/a                 |
| Participants                     | 4a      | Eligibility criteria for participants                                                                                                                                                       | 8                   |
|                                  | 4b      | Settings and locations where the data were collected                                                                                                                                        | 9-10                |
| Interventions                    | 5       | The interventions for each group with sufficient details to allow replication, including how and when they were actually administered                                                       | 8                   |
| Outcomes                         | 6a      | Completely defined pre-specified primary and secondary outcome measures, including how and when they were assessed                                                                          | 9-10                |
|                                  | 6b      | Any changes to trial outcomes after the trial commenced, with reasons                                                                                                                       | n/a                 |
| Sample size                      | 7a      | How sample size was determined                                                                                                                                                              | n/a                 |
|                                  | 7b      | When applicable, explanation of any interim analyses and stopping guidelines                                                                                                                | n/a                 |
| <b>Randomisation:</b>            |         |                                                                                                                                                                                             |                     |
| Sequence generation              | 8a      | Method used to generate the random allocation sequence                                                                                                                                      | n/a                 |
|                                  | 8b      | Type of randomisation; details of any restriction (such as blocking and block size)                                                                                                         | n/a                 |
| Allocation concealment mechanism | 9       | Mechanism used to implement the random allocation sequence (such as sequentially numbered containers), describing any steps taken to conceal the sequence until interventions were assigned | 8                   |
| Implementation                   | 10      | Who generated the random allocation sequence, who enrolled participants, and who assigned participants to interventions                                                                     | 8                   |
| Blinding                         | 11a     | If done, who was blinded after assignment to interventions (for example, participants, care providers, those                                                                                | 8                   |

|                                                      |     |                                                                                                                                                   |                 |
|------------------------------------------------------|-----|---------------------------------------------------------------------------------------------------------------------------------------------------|-----------------|
|                                                      |     | assessing outcomes) and how                                                                                                                       |                 |
|                                                      | 11b | If relevant, description of the similarity of interventions                                                                                       | n/a             |
| Statistical methods                                  | 12a | Statistical methods used to compare groups for primary and secondary outcomes                                                                     | 11-12           |
|                                                      | 12b | Methods for additional analyses, such as subgroup analyses and adjusted analyses                                                                  | 11-12           |
| <b>Results</b>                                       |     |                                                                                                                                                   |                 |
| Participant flow (a diagram is strongly recommended) | 13a | For each group, the numbers of participants who were randomly assigned, received intended treatment, and were analysed for the primary outcome    | 12 and Fig 2    |
|                                                      | 13b | For each group, losses and exclusions after randomisation, together with reasons                                                                  | Fig 2           |
| Recruitment                                          | 14a | Dates defining the periods of recruitment and follow-up                                                                                           | Fig 2           |
|                                                      | 14b | Why the trial ended or was stopped                                                                                                                | n/a             |
| Baseline data                                        | 15  | A table showing baseline demographic and clinical characteristics for each group                                                                  | 19 Table 2      |
| Numbers analysed                                     | 16  | For each group, number of participants (denominator) included in each analysis and whether the analysis was by original assigned groups           | 13              |
| Outcomes and estimation                              | 17a | For each primary and secondary outcome, results for each group, and the estimated effect size and its precision (such as 95% confidence interval) | 13 & 20 Table 3 |
|                                                      | 17b | For binary outcomes, presentation of both absolute and relative effect sizes is recommended                                                       | n/a             |
| Ancillary analyses                                   | 18  | Results of any other analyses performed, including subgroup analyses and adjusted analyses, distinguishing pre-specified from exploratory         | n/a             |
| Harms                                                | 19  | All important harms or unintended effects in each group (for specific guidance see CONSORT for harms)                                             | n/a             |
| <b>Discussion</b>                                    |     |                                                                                                                                                   |                 |
| Limitations                                          | 20  | Trial limitations, addressing sources of potential bias, imprecision, and, if relevant, multiplicity of analyses                                  | 4               |
| Generalisability                                     | 21  | Generalisability (external validity, applicability) of the trial findings                                                                         | 15-16           |
| Interpretation                                       | 22  | Interpretation consistent with results, balancing benefits and harms, and considering other relevant evidence                                     | 15-16           |
| <b>Other information</b>                             |     |                                                                                                                                                   |                 |
| Registration                                         | 23  | Registration number and name of trial registry                                                                                                    | n/a             |
| Protocol                                             | 24  | Where the full trial protocol can be accessed, if available                                                                                       | n/a             |
| Funding                                              | 25  | Sources of funding and other support (such as supply of drugs), role of funders                                                                   | 21              |

\*We strongly recommend reading this statement in conjunction with the CONSORT 2010 Explanation and Elaboration for important clarifications on all the items. If relevant, we also recommend reading CONSORT extensions for cluster randomised trials, non-inferiority and equivalence trials, non-pharmacological treatments, herbal interventions, and pragmatic trials. Additional extensions are forthcoming: for those and for up to date references relevant to this checklist, see [www.consort-statement.org](http://www.consort-statement.org).

1  
2  
3  
4  
5  
6  
7  
8  
9  
10  
11  
12  
13  
14  
15  
16  
17  
18  
19  
20  
21  
22  
23  
24  
25  
26  
27  
28  
29  
30  
31  
32  
33  
34  
35  
36  
37  
38  
39  
40  
41  
42  
43  
44  
45  
46  
47  
48  
49  
50  
51  
52  
53  
54  
55  
56  
57  
58  
59  
60

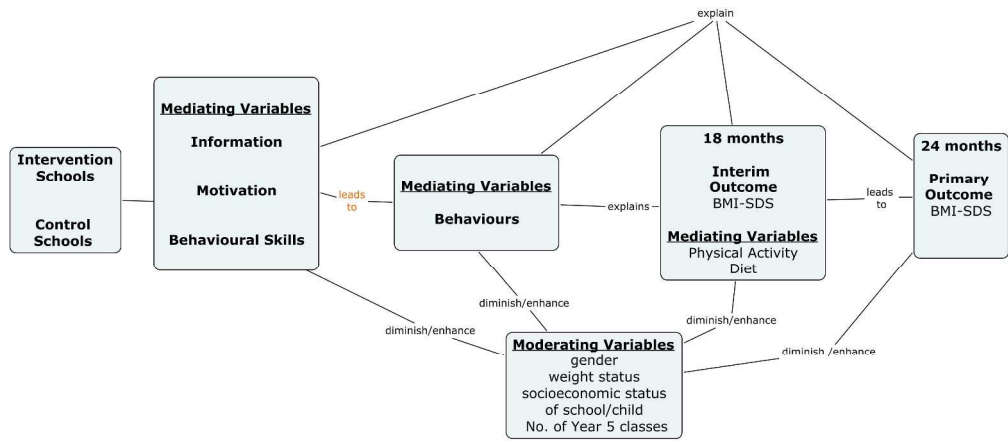

Schematic map of the proposed change processes for 'HeLP'  
1252x542mm (72 x 72 DPI)

Peer review only

Figure 2: Flow chart of participants through the trial and numbers of children from which anthropometric measures were collected.

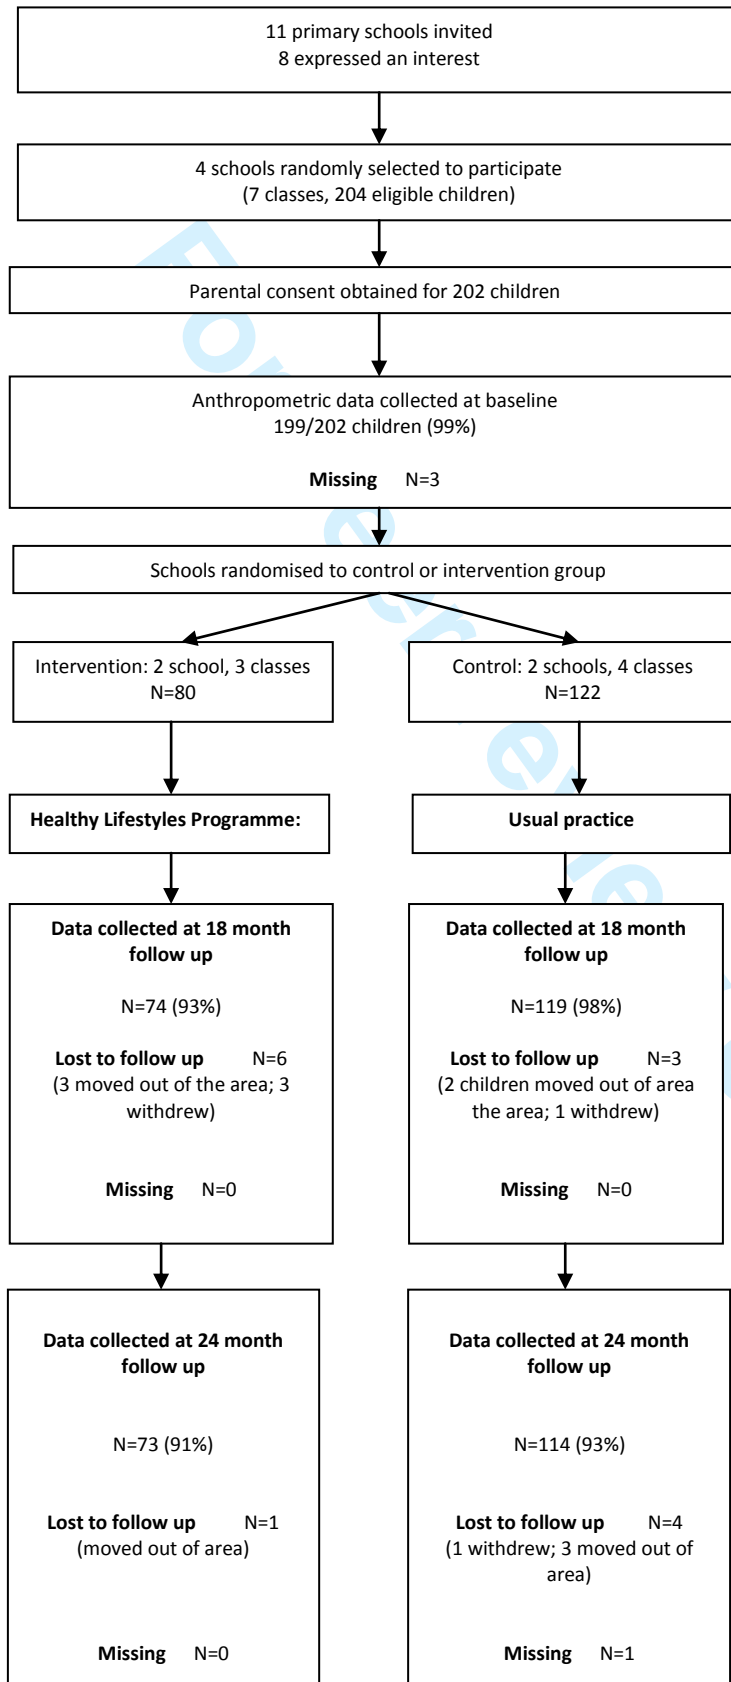

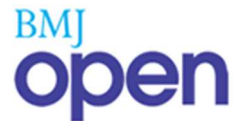

**Behavioural and weight status outcomes from an exploratory trial of the Healthy Lifestyles Programme (HeLP): A novel school-based obesity prevention programme**

|                                 |                                                                                                                                                                                                                                                                                                                                                   |
|---------------------------------|---------------------------------------------------------------------------------------------------------------------------------------------------------------------------------------------------------------------------------------------------------------------------------------------------------------------------------------------------|
| Journal:                        | <i>BMJ Open</i>                                                                                                                                                                                                                                                                                                                                   |
| Manuscript ID:                  | bmjopen-2011-000390.R1                                                                                                                                                                                                                                                                                                                            |
| Article Type:                   | Research                                                                                                                                                                                                                                                                                                                                          |
| Date Submitted by the Author:   | 30-Jan-2012                                                                                                                                                                                                                                                                                                                                       |
| Complete List of Authors:       | Lloyd, Jennifer; Peninsula College of Medicine and Dentistry, Institute for Health Service Research, University of Exeter<br>Wyatt, Katrina; Peninsula College of Medicine and Dentistry, Institute for Health Service Research, University of Exeter<br>Creanor, Siobhan; University of Plymouth, Centre for Health and Environmental Statistics |
| <b>Primary Subject Heading</b>: | Public health                                                                                                                                                                                                                                                                                                                                     |
| Secondary Subject Heading:      | Health services research                                                                                                                                                                                                                                                                                                                          |
| Keywords:                       | PUBLIC HEALTH, PREVENTIVE MEDICINE, Community child health < PAEDIATRICS                                                                                                                                                                                                                                                                          |
|                                 |                                                                                                                                                                                                                                                                                                                                                   |

SCHOLARONE™  
Manuscripts

1  
2  
3  
4  
5  
6  
7 Behavioural and weight status outcomes from an exploratory trial of the Healthy Lifestyles  
8 Programme (HeLP): A novel school-based obesity prevention programme

9  
10 Author names and affiliations:

11 \*Jennifer J Lloyd<sup>1</sup> Katrina M Wyatt<sup>1</sup> Siobhan Creanor<sup>2</sup>

12  
13 <sup>1,2</sup>Institute for Health Service Research, Peninsula College of Medicine and Dentistry,  
14 University of Exeter, Exeter, UK

15  
16 <sup>2</sup>Centre for Health & Environmental Statistics, University of Plymouth, Plymouth, UK

17  
18  
19 Email addresses:

20  
21 \*JL: [jennifer.lloyd@pms.ac.uk](mailto:jennifer.lloyd@pms.ac.uk)

22  
23 KMW: [katrina.wyatt@pms.ac.uk](mailto:katrina.wyatt@pms.ac.uk)

24  
25 SC: [siobhan.creanor@plymouth.ac.uk](mailto:siobhan.creanor@plymouth.ac.uk)

26  
27  
28  
29  
30 \*Corresponding author: Tel: 01392 722972 Fax: 01392 421009

31  
32 The Corresponding Author has the right to grant on behalf of all authors and does grant on  
33 behalf of all authors, an exclusive licence (or non-exclusive for government employees) on a  
34 worldwide basis to the BMJ Publishing Group Ltd and its Licensees to permit this article (if  
35 accepted) to be published in Archives of Disease in Childhood and any other BMJ PGL  
36 products to exploit all subsidiary rights, as set out in our licence

37  
38  
39  
40  
41  
42  
43  
44 Key words

45  
46 Obesity; Prevention; Intervention; Drama; Schools; Children; Exploratory trial

47  
48 Word count 3,802

**ABSTRACT**

**Objectives:** To assess the effect of a novel school-based obesity prevention programme on behavioural and weight status outcomes in English primary school children

**Design:** Exploratory cluster randomised controlled trial of the Healthy Lifestyles Programme (HeLP), involving 4 schools with children aged 9-10 years (n=202). Baseline, 18 and 24 month post **intervention baseline** height, weight, waist circumference, % body fat, objective physical activity using accelerometry, food intake and TV viewing/screen based activity were assessed. Intention to treat regression analyses (n=187) allowing for clustering were undertaken.

**Intervention:** The Healthy Lifestyle Programme uses a range of school-based activities including lessons, assemblies, parents' evenings, interactive drama workshops and goal setting to engage and support schools, children and their families in healthy lifestyle behaviours.

**Results:** At 18 months follow-up, intervention children had fewer 'negative food markers', consumed less energy dense snacks and more healthy snacks, had more 'positive food markers', had lower mean TV/screen time and spent more time doing Moderate-Vigorous Physical Activity (MVPA) each day than children in the control schools. Intervention children had lower anthropometric measures at 18 and 24 months than control children, with larger differences at 24 months than at 18 months for all measures except percentage body fat **standard deviation scores (sds)**.

**Conclusion:** Results from this exploratory trial show consistent positive changes in favour of the intervention across all targeted behaviours which, in turn, appear to affect weight status and body shape. A definitive trial is now **warranted** **justified**.

**Comment [j1]:** R2, comment 2.2

**Comment [j2]:** R1, comment 1.1

**Comment [j3]:** R1, comment 1.1

**Comment [j4]:** R2, comment 2.4



**Article focus**

- To present behavioural and weight status outcomes from an exploratory cluster randomised controlled trial of a novel school-based obesity prevention programme with English primary school children
- To present sample size estimates required for a definitive trial of the Programme based on outcome results, attrition rates and estimates of the intraclass correlations of the outcome measures

**Key messages**

- HeLP has been developed using behaviour change theory and extensive stakeholder involvement to engage and support children and their families in healthy lifestyles
- Behavioural and weight status outcomes at 18 and 24 months from this exploratory trial (Phase 3 pilot) show consistency in the direction of effects, all in favour of the intervention, demonstrating 'proof of concept'
- Results from the exploratory trial have provided sufficient evidence to support the evaluation of HeLP in a full scale trial

**Strengths and Limitations**

Strengths: The HeLP intervention has undergone a systematic development process using research evidence, behavioural theory, stakeholder consultation and piloting. This has enabled the researchers to gain a deeper understanding of the context in which the intervention was to be delivered in order to maximize engagement at all levels. The exploratory trial presented in this paper (phase 3 pilot) has demonstrated that not only is the design of the trial feasible, with outcome data obtained from 92% of the original cohort

1  
2  
3  
4  
5  
6  
7 at 24 months after transition to secondary school, but also that behavioural and weight  
8  
9 status outcome measures at 18 and 24 months show consistency in the direction of effects  
10  
11 (although the differences are relatively small), all in favour of the intervention,  
12  
13 demonstrating 'proof of concept'. This shows that a definitive trial of HeLP is both  
14  
15 justified, necessary and feasible and justified.

Comment [j5]: R2, comment 2.3

Comment [j6]: R2, comment 2.4

16  
17  
18 Limitations: The study was based in the South West of England which is predominantly  
19  
20 white, and although, there are areas of deprivation, none of the 4 schools had  $\geq 25\%$  of  
21  
22 children eligible for free school meals (the national average of proportion of children eligible  
23  
24 for free school meals). However, the intervention has been developed to allow the flexibility  
25  
26 and adaptation to ensure it is recognising and responding to the local needs of children and  
27  
28 families from different socio-economic and ethnic groups whilst still maintaining fidelity.  
29  
30 Food intake [1] and TV viewing/screen time [2] were self report and, although children were  
31  
32 asked to sit in their literacy tables so that appropriate support could be provided to each  
33  
34 child during completion, the information children are able to provide is limited. We did,  
35  
36 however, go to great lengths to ensure that the questionnaires were simple and presented  
37  
38 in such a way so as to trigger recall.  
39  
40  
41  
42  
43  
44  
45  
46  
47  
48  
49  
50  
51  
52  
53  
54  
55  
56  
57  
58  
59  
60

## INTRODUCTION

During the last three decades, the prevalence of obesity in children in Europe has risen dramatically [3]. In the UK, The Health Survey for England reported that 19% of girls and 18% of boys aged 11-15 were obese and 34% of girls and 33% of boys were overweight or obese [4]. The National Child Measurement Programme in England (NCMP) reported that by age 10-11 years, one in three children were either overweight or obese [5]. Being overweight in childhood is associated with adverse consequences including metabolic abnormalities, increased risk of Type II diabetes and musculo-skeletal and psychological problems [6]. A recent systematic review showed that the risk of overweight children becoming overweight adults was at least twice as high as for normal weight children [7] and more contemporary data, from a large prospective cohort of children born in the South-West of England in 1991/1992 (ALSPAC), showed that the four year incidence of obesity was higher between the ages of 7 and 11 years than between 11 and 15 years, suggesting that mid to late childhood (around 7-11 years) may merit greater attention in future obesity prevention interventions [8].

Obesity results from an imbalance between consumption and expenditure of energy. Epidemiological studies suggest a number of risk factors, the strongest of which is having one or more overweight parents [9]. There are also strong associations between the risk of overweight and socio-economic status, diet, physical activity levels and other lifestyle factors [10]. At a population level, the consumption of processed and fast food, including sweetened fizzy drinks, has increased while that of fruit and vegetables has declined and portion size in pre-packaged food has increased substantially [11]. In addition, the National

1  
2  
3  
4  
5  
6  
7 Travel Survey [12] has shown that, since the 1970s, children's transport activity (e.g. walking  
8 or cycling to school) has been in decline.

Comment [j7]: R2, comment 2.8

9  
10  
11  
12 Evidence about the relationship between physical activity, sedentary behaviours and  
13 childhood obesity is scarce with reviews of physical activity and obesity prevention  
14 reporting inconsistent results [13, 14]. Using data from the Avon Longitudinal Study of  
15 Parents and Children (ALSPAC), Riddoch and colleagues found strong associations between  
16 children's fat mass at age 14 and their physical activity at age 12 [15]. Compared to previous  
17 generations, children in the UK spend more time participating in sedentary activities; with  
18 research suggesting that children spend an average of 4.5 hours a day looking at a screen  
19 time a day [16]. Some studies have reported an association between time spent watching  
20 television and obesity [17]. Not only is television viewing a sedentary activity but it is also  
21 positively correlated with total calorific intake [18] and the consumption of snack foods [19].

Comment [j8]: R2, comment 2.9

22  
23  
24  
25  
26  
27  
28  
29  
30  
31  
32  
33  
34  
35 Schools have the potential to play a critical role in the prevention of overweight and obesity  
36 and the more recent development of community-wide multisite approaches often use  
37 school-based interventions as part of the overall programme of events [20, 21]. Schools'  
38 existing organisational, social and communication structures provide opportunities for  
39 regular health education and for the creation of a health enhancing environment and, if  
40 school-based interventions are developed in a systematic way involving stakeholders and  
41 appropriate piloting phases, they have the potential to reach children and their families  
42 across the social spectrum. The most recent systematic review (2008) of controlled trials of  
43 school-based interventions concluded that interventions which aim to increase activity and  
44  
45  
46  
47  
48  
49  
50  
51  
52  
53  
54  
55  
56  
57  
58  
59  
60

1  
2  
3  
4  
5  
6  
7 reduce sedentary behaviour and affect diet may be more effective in preventing children  
8 becoming overweight in the long term [22].  
9

10  
11  
12 The Healthy Lifestyle Programme (HeLP) is an innovative school-based intervention that  
13 aims to deliver a general healthy lifestyle message encouraging a healthy energy balance.  
14  
15 The Programme takes a population approach, seeking to change behaviour at a family as  
16 well as at an individual and school level. The development of HeLP followed the MRC  
17 guidance for the development and evaluation of complex interventions [23] involving  
18 careful theoretical derivation of behaviour change techniques [24] and three phases of  
19 iterative pilot work [25]. Phase 3 was the exploratory randomised controlled trial, to assess,  
20 for schools, children and their families: recruitment and retention in control and  
21 intervention schools; feasibility and acceptability of the intervention and of future trial  
22 outcomes measures, and facilitators and barriers to uptake of the intervention. In addition,  
23 data from this trial would help us in calculating the sample size required for a full scale trial.  
24  
25 Here we present the behavioural and weight status outcomes from the exploratory  
26 randomised controlled trial and the estimation of the sample size required for a definitive  
27 evaluation of the Programme.  
28  
29  
30  
31  
32  
33  
34  
35  
36  
37  
38  
39  
40  
41  
42

## 43 **METHODS**

### 44 **Study design**

45  
46 An exploratory cluster randomised controlled trial of the HeLP intervention, in Exeter (a city  
47 in the South West of England) involving 202 9-10 year old children. There is little ethnic mix  
48 in the South West, with the majority of the population being 'white'. Although overall socio-  
49 economic status for the area is higher than average, within Exeter there are some areas with  
50  
51  
52  
53  
54

1  
2  
3  
4  
5  
6  
7 quite severe deprivation. All state Primary and Junior schools in Exeter were eligible to take  
8  
9 part if they had at least one single age year 5 ~~group~~ class (9-10 year olds) (i.e. not mixed  
10  
11 classes, 8-10 or 9-11 year olds). Schools were recruited via the local network of Primary  
12  
13 school head teachers. Of the 11 eligible schools in Exeter, eight expressed an interest from  
14  
15 which four schools (with a total of 7 Year 5 classes) were randomly selected to participate  
16  
17 and randomly allocated to intervention or control using a telephone based randomisation  
18  
19 service used by involving an independent statistician independent of the research. ~~to~~  
20  
21 ~~participate~~ All parents of children were sent an information pack with an opportunity to opt  
22  
23 out of the study. If the opt out form was not returned within 2 weeks consent was inferred.  
24  
25 The class teacher gave daily reminders to the children to ensure that they and their parents  
26  
27 had read the information sheet. Baseline measures were taken prior to schools being  
28  
29 randomised to control or intervention groups.

### 31 Intervention

32  
33 HeLP is a multi-component 4 phase programme delivered to 9-10 year olds over 3 school  
34  
35 terms (Spring and Summer term of year 5 and Autumn term of year 6). The Programme is  
36  
37 based on the Information, Motivation and Behavioural Skills Model (IMB) [26] which  
38  
39 proposes that adequate information, motivation and behavioural skills are essential to  
40  
41 behaviour change. IMB has been demonstrated to provide an effective basis for behaviour  
42  
43 change interventions in other domains [27, 28] and aims to deliver a general healthy  
44  
45 lifestyle message encouraging a healthy energy balance. Within this context, three key  
46  
47 behaviours are emphasised: a decrease in the consumption of sweetened fizzy drinks; an  
48  
49 increase in the proportion of healthy snacks to unhealthy snacks consumed, and a reduction  
50  
51 in TV viewing and other screen-based activities. These messages are consistent with the  
52  
53 strategies suggested in the UK NICE guidance on the prevention of overweight and obesity  
54

Comment [j9]: R2, comment 2.10

Comment [j10]: R1, comment 1.2

Comment [j11]: R2, comment 2.1

Comment [j12]: R1, comment 1.3

1  
2  
3  
4  
5  
6  
7 in adults and children [29]. We hypothesise that targeting information, motivation and  
8  
9 behavioural skills will lead to the adoption of mediating behaviours which will, in turn, lead  
10  
11 to improvements in diet and physical activity thus preventing excessive weight gain. These  
12  
13 mediating variables and behaviours will interact to strengthen the engagement of children  
14  
15 and their parents throughout the course of the intervention. Figure 1 provides a  
16  
17 representation of this process indicating the feedback loops. This process of change may be  
18  
19 moderated by gender, weight status, socio-economic circumstances and school size. Figure  
20  
21 1 presents a schematic map of the proposed change processes.

22  
23 *Insert Fig 1*

24  
25  
26 An Intervention Mapping (IM) approach [30], involving considerable stakeholder  
27  
28 consultation and pilot work, was undertaken to link theory to specific behaviour change  
29  
30 techniques (BCTs) [31] and methods of delivery [24] that were suitably engaging and

31  
32 compatible with the existing school curriculum. Table 1 shows each phase of HeLP, the  
33  
34 targets of change, the BCTS used and the method and agent of delivery. Key to engaging and  
35  
36 motivating the children are the highly inclusive and interactive drama activities, which are  
37  
38 built around 4 characters (Disorganised Duncan, Football Freddie, Snacky Sam and Active  
39  
40 Amy) with whom the children identify. During the Healthy Lifestyles Week (Phase 2) children  
41  
42 work closely with the character most like them to help them to change their behaviours. In  
43  
44 Phase 3, the children reflect on their own lifestyle behaviours around diet and activity and  
45  
46 set simple goals with their parents. The Programme has been specifically designed so that  
47  
48 the function of each phase is clearly defined and delivered appropriately while the precise  
49  
50 content can be adapted to relate to children from differing ethnic and social backgrounds.  
51  
52

Comment [j13]: R2, comment 2.11

Comment [j14]: R1, comment 1.4

Comment [j15]: R1, comment 1.5

Comment [j16]: R1, comment 1.5. More information about the intervention.

1  
2  
3  
4  
5  
6  
7 During the drama workshops children cocreate scenes with the actors and provide their  
8 own ideas and solutions to problems faced by the characters.

Comment [j17]: R1, comment 1.9

10 Insert table 1

### 13 Outcome measures

14 Baseline height, weight, waist circumference, % body fat, food intake, TV viewing/screen-  
15 based activity and physical activity were collected at the start of the school year, in the  
16 Autumn term (October/November, 2008) prior to randomisation of schools. These same  
17 measures were then collected 18 months post baseline (June/ July 2009) and  
18 anthropometric measures only were collected 24 months post baseline (October/November  
19 2010), after the children had moved to secondary school.

#### 27 Anthropometric

28 All anthropometric measures were taken by an independent assessor who was blinded to  
29 each child's allocated group. For the anthropometric measures children were asked to  
30 remove their shoes and socks. Height was measured using a portable SECA stadiometer  
31 (Hamburg, Germany) and recorded to an accuracy of 1mm. Weight and body fatness was  
32 measured using the Tanita SC330 portable body composition analyser (U.K. Ltd., Middlesex,  
33 U.K.). Weight was recorded to within 0.1kg. Body fatness was estimated from leg to leg  
34 bioelectrical impedance. Waist circumference was measured using a non-elastic flexible  
35 tape 4cm above the umbilicus.

Comment [j18]: Unsure what additional information is required R1, comment 1.11

#### 47 Behavioural

48 Food intake was assessed using an the adapted version of the validated Food Intake  
49 Questionnaire (FIQ) [1], a recall method which asks whether specific foods were consumed  
50 the previous day. Children completed the FIQ twice, during school hours, in order to obtain  
51  
52  
53  
54

Comment [j19]: R2, comment 2.12



1  
2  
3  
4  
5  
6  
7 a weekday and weekend food intake. These results were then combined and weighted to  
8  
9 calculate the mean number of different healthy snacks (HS), energy dense snacks (EDS),  
10  
11 positive (PM) and negative (NM) foods consumed each day. TV viewing/screen based usage  
12  
13 was assessed using ~~an~~ the adapted version of the validated Children's TV Viewing Habits  
14  
15 Questionnaire [2]. Participants were asked to record the time (in minutes) they usually  
16  
17 spent watching TV or doing other leisure time screen-based activities on weekdays before  
18  
19 school, before tea and after tea and on the weekend (Saturday and Sunday morning,  
20  
21 afternoon and evening). The results were then combined and weighted to calculate the  
22  
23 mean time spent watching TV/doing leisure time screen-based activities each day.  
24  
25 Additional information on the number and location of TV sets and rules in the home  
26  
27 regarding TV viewing and screen based usage was also collected.  
28  
29  
30

Comment [j20]: R2, comment 2.12

31  
32 Questionnaires were completed during class time, where children were asked to sit in their  
33  
34 literacy groups (table groupings based on their ability in literacy). JL instructed the class on  
35  
36 how to complete the questionnaires and, with the class teacher, learning support assistant  
37  
38 and an additional researcher, assisted individual children where necessary. Physical activity  
39  
40 was measured in one randomly selected class per school using a GT1M Actigraph (Actigraph  
41  
42 LLC, Pensacola, FL:<http://www.theactigraph.com>), attached to a flexible elastic belt  
43  
44 fastened securely round the waist, which children were asked to wear ~~around their waist~~  
45  
46 during waking hours over seven consecutive days (5 weekdays and one weekend). As the  
47  
48 device is not waterproof children were instructed to remove it for water-based activities  
49  
50 and record on their log sheet the reason for removal and the duration of this non-wear  
51  
52 time.

Comment [j21]: R1, comment 1.8

Comment [j22]: R1, comment 1.6

## Data management

Anthropometric and questionnaire data were entered into a specifically designed database.

10% of entries (using a random number generator) were subsequently checked by a second researcher revealing only two data entry errors.

Comment [j23]: R2, comment 2.13

The raw accelerometry data from the pre and post time points was processed using kinesoft software (version 3.3.55) and quality control checks carried out. To be included in the analysis, participants had to have at least 10 hours of wear time a day on 3 week days and one weekend day. Days were counted if participants accrued 10 hours of wear time ~~each~~

during the day. Periods of non-wear time were classified as 30 mins of zero counts. Those that failed to meet the inclusion criteria were excluded from subsequent analysis. Useable

Comment [j24]: R2, comment 2.14

accelerometry data was obtained for 104/111 (95%) and 95/111 (85%) of participants at baseline and 18 months follow-up respectively.

Comment [j25]: R1, comment 1.7

Eligible days of data were organised into time spent in each activity intensity per day.

Activity intensity categories were classified using the following previously published cut points (sedentary: 0 to 299; light: 300 to 3580; moderate: 3581 to 6129; vigorous:  $\geq 6130$ ) [32].

## Statistical analysis

As this was an exploratory study we sought to utilise the results, including the attrition rates and estimates of the intraclass correlations of the outcome measures, to help us plan a definitive cluster randomised controlled trial, including estimating the sample size needed for such a definitive trial.

1  
2  
3  
4  
5  
6  
7 The main analysis of the effect of the exploratory trial was undertaken on an intention-to-  
8  
9 treat basis. As there was only a small number of missing data for some of the outcomes [\(see](#)  
10  
11 [Figure 2\)](#), the analysis was based on all the available data, with no imputation for missing  
12  
13 data. [As this was an](#) exploratory trial [involving only four schools](#), only cluster level analyses  
14  
15 were undertaken [33, 34]; this meant that the analyses could not be adjusted for individual-  
16  
17 level covariates (e.g. baseline measures). As there were varying numbers of children in each  
18  
19 school, the analyses were weighted by cluster size [34, 35]; inverse variance weighting was  
20  
21 not used, given the uncertainties in estimating the intraclass correlation coefficients.  
22

Comment [j26]: R3, comment 3.1

23  
24 Differences between the intervention and control groups are presented, together with 95%  
25  
26 confidence intervals. Unadjusted results (i.e. without clustering being taken into account)  
27  
28 are also presented, in order to allow comparison of the precision of the estimates of the  
29  
30 effect of the intervention. Intraclass correlation coefficients (and 95% confidence intervals)  
31  
32 were calculated for selected outcomes. All analyses were undertaken in STATA version 11.1.  
33

## 34 35 RESULTS

### 36 37 Recruitment and participant characteristics at baseline

38  
39 Figure 2 shows the flow of participants through the trial [36] and follow-up of  
40  
41 anthropometric measures at 18 and 24 months. The intervention group consisted of two  
42  
43 primary schools, one with 170 children on the school roll (13% eligible for free school meals  
44  
45 (FSM) and one larger primary school with 384 children on the roll (2.6% FSM). The control  
46  
47 group consisted of two primary schools, one with 317 on roll (14% FSM) and the other with  
48  
49 364 on roll (6% FSM).  
50

1  
2  
3  
4  
5  
6  
7 Table 2 shows that the intervention and control groups were generally comparable at  
8  
9 baseline with the percentages of children overweight/obese being 24% and 26%  
10  
11 respectively [37]. Whilst there was higher percentage of obese and a higher percentage  
12  
13 body fat ( $\geq 85^{\text{th}}$  and  $< 95^{\text{th}}$  centile) in the control schools, the continuous measurements had  
14  
15 very similar means and ranges. Food intake on all categories were similar for both control  
16  
17 and intervention groups, with an approximate ratio for HS:EDS and PM:NM of 1:1.

18 Children's mean TV viewing/screen time was 2.6 hours a day, which mirrors national data

19  
20  
21 for 4-15 year olds [16]. The percentage of children who had televisions in their bedrooms

Comment [j27]: R2, comment 2.15

22  
23 and no rules regarding the amount of TV/screen time was higher in the control group

24  
25 compared to the intervention group, however, the percentage of children who had no rules

26  
27 regarding screen time was higher in the intervention group compared to the control group.

Comment [j28]: R2, comment 2.16

28  
29 Both groups spent a similar amount of time per day in sedentary activities but differed  
30  
31 slightly in time spent in MVPA, however this varied greatly between children (range; 13.7-  
32  
33 104 mins). Mean sedentary time (including sleep time) for all children was 16.2 hours/day.

Comment [j29]: R1, comment 1.7

34  
35  
36 *Insert Fig 2*

37  
38  
39 *Insert Table 2*

## 40 41 42 **Intervention and control group comparisons at follow-up**

### 43 44 *Anthropometric*

45  
46 Anthropometric follow-up data was collected for 193 and 187 participants at 18 and 24  
47  
48 months respectively (94% and 92% of the original cohort of 202 children). Table 3 shows the  
49  
50 comparisons of the main outcomes at 18 and 24 month follow-ups between the children in  
51  
52 the intervention schools and control schools. Children in the intervention schools typically  
53  
54

1  
2  
3  
4  
5  
6  
7 fared better than those in the control schools having, on average, lower anthropometric  
8 measures at 18 and 24 months with larger differences at 24 months than at 18 months for  
9 all measures except percentage Body Fat sds. At 18 months, the proportion of overweight  
10 and obese children increased in the control schools from 26% (31/122) to 32% (38/119) but  
11 remained at 24% (18/74) in the intervention schools. At 24 months the proportion of  
12 overweight/obese children remained at 32% (36/114) in the control schools and decreased  
13 slightly to 22% (16/73) in the intervention schools. The waist circumference data show  
14 similar proportions at baseline ( $\geq 85^{\text{th}}$  centile) shifting to an 8.7 % difference in favour of the  
15 intervention at 24 months.  
16  
17  
18  
19  
20  
21  
22  
23  
24

#### 25 *Behavioural*

26  
27 At 18 months follow-up, children in the intervention schools had fewer 'negative food  
28 markers', consumed less energy dense snacks and more healthy snacks, had more 'positive  
29 food markers', had lower mean TV/screen time and on average spent more time doing  
30 Moderate-Vigorous Physical Activity each day than children in the control schools.  
31  
32  
33  
34

35  
36  
37 As expected, the 95% confidence intervals were narrower for all outcomes in the  
38 unadjusted results, when the clustering within schools was (incorrectly) not accounted for in  
39 the analyses.  
40  
41  
42  
43  
44

#### 45 *Estimation of intraclass correlation coefficients*

46  
47 The intraclass correlation coefficient (ICC) for BMI at 24 months for this exploratory trial was  
48 estimated to be 0.04 (95% CI: 0.00 to 0.15) and for BMI sds at 24 months was 0.06 (0.00 to  
49 0.19). As four clusters are insufficient to precisely estimate the intraclass correlation  
50 coefficients, we have looked at the effect of using a range of ICCs, based on both our pilot  
51  
52  
53  
54  
55

**Comment [j30]:** Compared to baseline has not been inserted as suggested by R2 comment 2.17 as given there were only 4 schools only cluster level analyses were appropriate.

1  
2  
3  
4  
5  
6  
7 data and other published data in this field [38-40], in our sample size calculations for a  
8 definitive randomised controlled trial (see Table 4).

Comment [j31]: R2, comment 2.18

10  
11  
12  
13 *Estimation of sample size required for definitive trial*

14  
15 Statistical efficiency will be maximised in a full trial by analysing BMI sds and adjusting for  
16 baseline values, which will reduce the standard error of the estimates of the difference  
17 between intervention and control. In this exploratory trial, the correlation between baseline  
18 and 24 month BMI sds was 0.93 (95% CI: 0.92 to 0.96).

19  
20  
21  
22  
23  
24  
25 The sample size estimates shown are based on recruiting 26 schools, each with an average  
26 of 50 children. Using BMI sds as the primary outcome measure at 24 months follow-up,  
27 Table 4 shows possible sample sizes required for a definitive trial, for a number of possible  
28 scenarios (varying possible effect sizes and ICCs). All sample size calculations are two-sided,  
29 significance level of 5%, with an adjustment for a more conservative reduction in variability  
30 (assuming a correlation between baseline and 24 month measures of 0.8) and assuming a  
31 loss to follow-up of 20%.

32  
33  
34  
35  
36  
37  
38  
39  
40  
41 A difference in BMI sds of 0.25 has been shown to be a meaningful change, impacting on  
42 improvement on adiposity and metabolic health [41]. Using a significance level of 5%, we  
43 would need to recruit 1267 children from 26 schools to be able to detect a true difference of  
44 at least 0.25, with 90% power, allowing for a conservative attrition rate of 20%, assuming an  
45 ICC of 0.03.

## DISCUSSION

We have shown over three phases of piloting that HeLP is feasible and acceptable to schools, children and their families [25] and that the study design is feasible for a definitive evaluation. We were able to recruit and retain schools and children throughout the study, obtaining follow-up data from 92% of the original cohort at 24 months, after the children had moved on to secondary school. In addition, we obtained useable accelerometry data from 85% of the children at 18 months. We are aware that with a sample size of 202 children and only 4 schools, the trial was not powered to be able to provide precise estimates of the effect of the intervention. Analyses were undertaken at cluster-level only, thus unable to be adjusted for individual-level covariates (such as measures at baseline), however, both behavioural and anthropometric outcome measures at 18 and 24 months showed consistency in the direction of effects, all in favour of the intervention, demonstrating 'proof of concept'.

Although estimates of the differences between intervention and control schools were imprecise, it is encouraging to see that there was a consistent positive impact on the behaviours targeted (snacking, screen time and physical activity) and on anthropometric values. When we began the development of this Programme back in 2005, we believed that the cumulative effect of making small, sustainable changes in multiple behaviours related to the energy balance had the potential to significantly impact on weight status. Interestingly, there were larger differences at 24 months than at 18 months for all measures except percentage body fat sds, which is encouraging, suggesting the potential of the Programme to support children and their families to sustain these lifestyle changes in the longer term.

1  
2  
3  
4  
5  
6  
7 Further evidence of 'proof of concept' is shown by looking at the weight status proportions.

8  
9 Whilst the proportion of overweight and obese were similar at baseline in both groups, in  
10 the control schools, this increased to 32% at 18 months (matching our national data for  
11 children of the same age) but remained at baseline levels in the intervention schools at both  
12 the 18 and 24 month follow-up, suggesting that the intervention may have the effect of  
13 preventing the shift from normal to overweight or overweight to obese that occurs during  
14 this time. These results are supported by recent tracking data from England showing that  
15 the greatest increases in weight in a non obese sample are between the ages of 7 and 11  
16 years [8]. Our waist circumference data is particularly striking, showing a reduction of  
17 almost 10% in those with a waist circumference greater than the 85<sup>th</sup> centile in the  
18 intervention group at 24 months, whilst remaining at baseline levels in the control group.  
19  
20  
21  
22  
23  
24  
25  
26  
27  
28

29  
30  
31 In the planned definitive RCT, more sophisticated statistical analyses will be able to be  
32 undertaken at the individual level and, by incorporating individual level covariates, the  
33 precision of effect of the intervention will be further improved. Despite being unable to do  
34 this for the current study, the data obtained from this study has enabled us to calculate a  
35 likely sample size required for the definitive evaluation.  
36  
37  
38  
39  
40  
41  
42

#### 43 **CONCLUSION**

44  
45 Situating an intervention within a school is not sufficient within itself to generate sustained  
46 behaviour change. It is critical to engage and motivate children and to generate a supportive  
47 social context involving the whole school as well as children's parents [42]. HeLP is unique in  
48 that it uses highly inclusive and interactive delivery methods for a range of behaviour  
49 change techniques to encourage identification with and ownership of the key messages,  
50  
51  
52  
53  
54



1  
2  
3  
4  
5  
6  
7  
8  
9  
10  
11  
12  
13  
14  
15  
16  
17  
18  
19  
20  
21  
22  
23  
24  
25  
26  
27  
28  
29  
30  
31  
32  
33  
34  
35  
36  
37  
38  
39  
40  
41  
42  
43  
44  
45  
46  
47  
48  
49  
50  
51  
52  
53  
54  
55  
56  
57  
58  
59  
60

ensuring that children have the information, motivation, behavioural skills and support necessary to initiate and sustain change. Results from this exploratory trial show positive changes in favour of the intervention across all targeted behaviours (snacking, screen time and physical activity). Furthermore, these changes appear to have a sustained effect on children’s weight status and body shape. A definitive trial is now warranted justified.

For peer review only

Comment [j32]: R2, comment 2.19

**Table 1** Intervention phases, change targets, BCTs and the method and agent of delivery.

| Intervention Phase                                                                                                                       | Change targets                                                                                                                                                                                                                                    | Behaviour change techniques                                                                                                                                                                                                                                                      | Method (Frequency <u>and duration</u> ) and agent of delivery                                                                                                                                                                                                                                                                                                                                                                         | Comment [j33]: R1, comment 1.5                                                                                                                         |
|------------------------------------------------------------------------------------------------------------------------------------------|---------------------------------------------------------------------------------------------------------------------------------------------------------------------------------------------------------------------------------------------------|----------------------------------------------------------------------------------------------------------------------------------------------------------------------------------------------------------------------------------------------------------------------------------|---------------------------------------------------------------------------------------------------------------------------------------------------------------------------------------------------------------------------------------------------------------------------------------------------------------------------------------------------------------------------------------------------------------------------------------|--------------------------------------------------------------------------------------------------------------------------------------------------------|
| <b>Phase 1</b><br><b>Creating a supportive context</b><br><br>Spring term (Yr 5)                                                         | Establish relationships with schools, children and families<br>Raise awareness and increase knowledge<br><br>Promote positive attitudes and norms towards healthy eating and physical activity<br><br>Increase self efficacy for behaviour change | Provide information<br>Creating social norms<br><br>Exchange information<br><br>Communicate messages implying positive evaluations and norms.<br><br>Role modelling<br>Skill building                                                                                            | Whole school assembly (1) (20 mins)<br><br>Newsletter articles (3) (Over the Spring term)<br><br>Activity workshops (2) (parents observe) (1.5 hours)<br><br>Parents' evening (1) involving child performances (1 hour)                                                                                                                                                                                                               | HeLP Coordinators<br><br>HeLP Coordinators<br><br>Professional sportsmen/dancers<br><br>Class teachers/ HeLP Coordinator /Drama group                  |
| <b>Phase 2</b><br><b>Intensive Healthy Lifestyles Week – one week</b><br><br>Summer term (Yr 5)                                          | Strengthen relationships with schools, children and families<br>Increase knowledge<br>Increase self awareness<br>Increase self efficacy<br>Develop communication and problem solving skills<br>Increase social support (school, peer and family)  | Exchange information<br><br>Decision balance<br>Problem solving tasks<br>Modelling/demonstrating behaviour<br>Providing role models<br>Communication skills training                                                                                                             | *PSHE lessons (5) (morning) (1 hour)<br><br>§Drama (5) (afternoon) (forum theatre; role play; food tasting, discussions, games etc) (2 hours)                                                                                                                                                                                                                                                                                         | Class teacher<br><br>Drama group                                                                                                                       |
| <b>Phase 3</b><br><b>Personal Goal Setting with Parental Support-</b><br>goals set during week following drama<br><br>Summer term (Yr 5) | Increase awareness of own behaviour<br><br>Increase self efficacy for change<br>Develop planning skills<br>Increase parental support                                                                                                              | Self monitoring<br><br>Identification and resolution of barriers<br>Provide models of others setting goals<br>Prompt intention and specific goal formation<br>Problem solving<br>Behavioural contract<br><br>Prompt identification as a role model                               | Self reflection questionnaire (1) (40 mins)<br><br>Goal setting sheet to go home to parents to complete with child (1) (10 mins)<br><br>1:1 goal setting interview (1) (goals sent home to parents) (10 mins)<br><br>Parent's evening (1) (child involvement – Forum Theatre) (1 hour)                                                                                                                                                | HeLP Coordinator/<br>Class teacher<br><br>HeLP Coordinator /Parents<br><br>HeLP Coordinator<br><br>HeLP Coordinator /Drama group                       |
| <b>Phase 4</b><br><b>Reinforcement Activities</b><br><br>Autumn term (Yr 6)                                                              | Increase self awareness and prioritise healthy goals.<br>Consolidate social support.<br><br>Develop monitoring and coping skills<br>Increase parental support                                                                                     | Prompt self monitoring and practice<br>Provide social approval<br><br>Prompt self monitoring<br>Prompt intention formation<br>Follow up prompts<br>Prompt practice<br><br><br>Prompt review of behavioural goals<br>Prompt barrier identification and resolution<br>Coping plans | Newsletter articles (2) (over the Autumn term)<br>Whole school assembly (1) (20 mins)<br>Drama workshop (1) (1 hour)<br>*PSHE lesson (1) (1 hour)<br><br>Class to deliver assembly about the project to rest of school (1) (20 mins) (parents invited to attend)<br><br>1-to-1 goal supporting interview to discuss facilitators/barriers and to plan new coping strategies (1) (10 mins)<br><br>(renewed goals sent home to parents) | HeLP Coordinator<br><br>Drama group<br><br>Drama group<br>Class teacher<br><br>Children to all other year groups in the school<br><br>HeLP Coordinator |

\* PSHE – Personal, Social and Health Education

§The drama framework includes 4 characters, each represented by one of the actors, whose attributes related to the three key behaviours. Children choose which of the characters they most resemble then work with that actor to help the character learn to change their behaviour.

**Table 2** Baseline characteristics of children allocated to the intervention and control

|                                                                                                     | Intervention<br>(n=80)       | Control<br>(n=122)           | Total<br>(n=202)             |
|-----------------------------------------------------------------------------------------------------|------------------------------|------------------------------|------------------------------|
| <b>Demographics</b>                                                                                 |                              |                              |                              |
| Age, years, mean (SD)                                                                               | 9.69 (0.3)                   | 9.69 (0.3)                   | 9.69 (0.3)                   |
| <b>Sex</b>                                                                                          |                              |                              |                              |
| % (n) Male                                                                                          | 50.0 (40)                    | 50.0 (61)                    | 50.0 (101)                   |
| % (n) Female                                                                                        | 50.0 (40)                    | 50.0 (61)                    | 50.0 (101)                   |
| Total % of all children in the schools eligible for free school meals                               | 5.7                          | 9.7                          | 7.9                          |
| <b>Anthropometric Measures</b>                                                                      |                              |                              |                              |
| % (n) Overweight ( $\geq 85^{\text{th}}$ and $< 95^{\text{th}}$ centile) <sup>a</sup>               | 10.5 (8)                     | 7.6 (9)                      | 8.7 (17)                     |
| % (n) Obese ( $\geq 95^{\text{th}}$ centile)                                                        | 13.2 (10)                    | 18.5 (22)                    | 16.4 (32)                    |
| % (n) Underweight ( $\leq 2^{\text{nd}}$ centile)                                                   | 1.3 (1)                      | 0.0 (0)                      | 0.5 (1)                      |
| % (n) with Bodyfat ( $\geq 85^{\text{th}}$ and $< 95^{\text{th}}$ centile) <sup>b</sup>             | 5.3 (4)                      | 11.8 (14)                    | 9.2 (18)                     |
| % (n) with Bodyfat $\geq 95^{\text{th}}$ centile                                                    | 11.8 (9)                     | 10.1 (12)                    | 10.8 (21)                    |
| % (n) with Bodyfat $\leq 2^{\text{nd}}$ centile                                                     | 19.7 (15)                    | 14.3 (17)                    | 16.4 (32)                    |
| % (n) with Waist Circumference ( $\geq 85^{\text{th}}$ and $< 95^{\text{th}}$ centile) <sup>c</sup> | 21.3 (17)                    | 21.3 (26)                    | 21.3 (43)                    |
| % (n) with Waist Circumference $\geq 95^{\text{th}}$ centile                                        | 21.3 (17)                    | 21.3 (26)                    | 21.3 (43)                    |
| Mean (sd) BMI<br>[range]                                                                            | 17.4 (2.6)<br>[13.3 to 25.4] | 17.8 (2.8)<br>[13.7 to 25.1] | 17.6 (2.7)<br>[13.3 to 25.4] |
| Mean (sd) BMI sds<br>[range]                                                                        | 0.3 (1.1)<br>[-2.3 to 2.5]   | 0.4 (1.1)<br>[-2.0 to 2.9]   | 0.3 (1.1)<br>[-2.3 to 2.9]   |
| Mean (sd) % Bodyfat<br>[range]                                                                      | 19.3 (6.8)<br>[3.0 to 37.4]  | 20.0 (6.7)<br>[7.6 to 36.8]  | 19.71 (6.8)<br>[3.0 to 37.4] |
| Mean (sd) % Bodyfat sds<br>[range]                                                                  | -0.9 (3.4)<br>[-25.8 to 2.3] | -0.5 (1.7)<br>[-6.5 to 2.4]  | -0.6 (2.5)<br>[-25.8 to 2.4] |
| Mean (sd) Waist Circumference (cm)<br>[range]                                                       | 62.0 (6.5)<br>[50 to 81]     | 62.6 (7.0)<br>[52 to 83]     | 62.3 (6.8)<br>[50 to 83]     |
| Mean (sd) Waist circumference sds<br>[range]                                                        | 0.8 (1.0)<br>[-1.9 to 3.0]   | 0.91 (1.0)<br>[-1.2 to 3.2]  | 0.9 (1.0)<br>[-1.9 to 3.2]   |
| <b>Food Intake*(sd)</b>                                                                             |                              |                              |                              |
| Mean (sd) Energy Dense Snacks (EDS)<br>[range]                                                      | 4.2 (2.2)<br>[0.0 to 10.7]   | 4.1 (2.1)<br>[0.3 to 11.2]   | 4.2 (2.1)<br>[0.0 to 11.2]   |
| Mean (sd) Healthy Snacks (HS)<br>[range]                                                            | 3.2 (1.6)<br>[0.3 to 8.4]    | 3.4 (1.7)<br>[0.0 to 8.0]    | 3.4 (1.7)<br>[0.0 to 8.4]    |
| Mean (sd) Positive Food Markers (PM)<br>[range]                                                     | 7.3 (2.9)<br>[2.6 to 15.0]   | 7.6 (3.3)<br>[2.3 to 20.3]   | 7.5 (3.1)<br>[2.3 to 20.3]   |
| Mean (sd) Negative Food Markers (NM)<br>[range]                                                     | 6.8 (3.3)<br>[1.4 to 16.6]   | 6.8 (3.2)<br>[0.3 to 20.2]   | 6.8 (3.2)<br>[0.3 to 20.2]   |
| <b>TV/screen viewing</b>                                                                            |                              |                              |                              |
| Mean (sd) TV/screen viewing (hours/day)<br>[range]                                                  | 2.5 (1.7)<br>[0.1 to 7.9]    | 2.7 (1.7)<br>[0.3 to 8.4]    | 2.6 (1.7)<br>[0.1 to 8.4]    |
| % (n) with TV in bedroom                                                                            | 45.6 (36)                    | 59.8 (73)                    | 54.2 (109)                   |
| % (n) with no rules re TV/screen time                                                               | 39.2 (31)                    | 33.9 (40)                    | 36.0 (71)                    |
| <b>Physical activity (mean time/day)</b>                                                            |                              |                              |                              |
| Moderate-Vigorous PA/day (mins)                                                                     | 36.7 (12.0)                  | 49.5 (20.0)                  | 43.6 (17.9)                  |

|                                  |                |                 |                 |
|----------------------------------|----------------|-----------------|-----------------|
| [range]                          | [13.7 to 70.0] | [18.1 to 104.4] | [13.7 to 104.4] |
| Sedentary Activities/day (hours) | 16.2 (1.6)     | 16.4 (1.9)      | 16.2 (1.9)      |
| [range]                          | [9.8 to 18.7]  | [10.6 to 19.2]  | [9.3 to 19.2]   |

\*Refers to the number of different EDS/HS/PM/NM consumed in a day

a [37]

b [43]

c [44]

For peer review only

**Table 3:** Difference in outcomes at 18 and 24 months follow-up of children allocated to the intervention and control groups.

| Outcome                                                     | Mean difference (Intervention minus Control) (95% CI) |                           |                           |                           |
|-------------------------------------------------------------|-------------------------------------------------------|---------------------------|---------------------------|---------------------------|
|                                                             | 18 months                                             |                           | 24 months                 |                           |
|                                                             | Unadjusted                                            | Adjusted for clustering   | Unadjusted                | Adjusted for clustering   |
| <b>BMI</b>                                                  | -0.95<br>(-1.88 to -0.02)                             | -0.95<br>(-3.79 to 1.90)  | -1.16<br>(-2.15 to -0.18) | -1.16<br>(-3.82 to 1.49)  |
| <b>BMI sds</b>                                              | -0.38<br>(-0.74 to -0.02)                             | -0.38<br>(-1.65 to 0.89)  | -0.45<br>(-0.82 to -0.08) | -0.45<br>(-1.71 to 0.81)  |
| <b>%Body fat</b>                                            | -0.83<br>(-3.01 to 1.36)                              | -0.83<br>(-6.26 to 4.60)  | -1.28<br>(-3.60 to 1.05)  | -1.28<br>(-8.69 to 6.14)  |
| <b>%Body fat sds</b>                                        | -0.33<br>(-1.04 to 0.38)                              | -0.33<br>(-2.52 to 1.85)  | -0.21<br>(-0.85 to 0.42)  | -0.21<br>(-2.45 to 2.03)  |
| <b>Waist circumference (cm)</b>                             | -2.01<br>(-4.23 to 0.21)                              | -2.01<br>(-9.54 to 5.52)  | -2.97<br>(-5.36 to -0.59) | -2.97<br>(-10.30 to 4.35) |
| <b>Waist circumference sds</b>                              | -0.32<br>(-0.63 to -0.01)                             | -0.32<br>(-1.52 to 0.87)  | -0.46<br>(-0.79 to -0.13) | -0.46<br>(-1.72 to 0.80)  |
| <b>% with BMI ≥85<sup>th</sup> centile</b>                  | -7.6<br>(-20.5 to 5.3)                                | -7.6<br>(-49.4 to 34.2)   | -9.7<br>(-22.4 to 3.1)    | -9.7<br>(-27.8 to 8.5)    |
| <b>% with %Body fat ≥ 85<sup>th</sup> centile obese</b>     | -5.5<br>(-15.6 to 4.6)                                | -5.5<br>(-31.8 to 20.9)   | -6.4<br>(-17.8 to 5.1)    | -6.4<br>(-34.9 to 22.1)   |
| <b>% with Waist circumference ≥ 85<sup>th</sup> centile</b> | -5.9<br>(-20.1 to 8.3)                                | -5.9<br>(-50.7 to 39.0)   | -8.7<br>(-22.9 to 5.4)    | -8.7<br>(-58.9 to 41.4)   |
| <b>Energy dense snacks (EDS)</b>                            | -0.28<br>(-0.83 to 0.27)                              | -0.28<br>(-0.83 to 0.27)  | -                         | -                         |
| <b>Healthy snacks (HS)</b>                                  | 0.47<br>(0.02 to 0.92)                                | 0.47<br>(-1.29 to 2.23)   | -                         | -                         |
| <b>Positive food markers (PM)</b>                           | 0.38<br>(-0.37 to 1.13)                               | 0.38<br>(-1.55 to 2.31)   | -                         | -                         |
| <b>Negative food markers (NM)</b>                           | -0.69<br>(-1.52 to 0.15)                              | -0.69<br>(-1.70 to 0.33)  | -                         | -                         |
| <b>Duration of TV viewing (hours/day)</b>                   | -0.41<br>(-0.91 to 0.09)                              | -0.41<br>(-1.28 to 0.46)  | -                         | -                         |
| <b>Sedentary Activities/day (hours)</b>                     | -0.04<br>(-1.09 to 1.01)                              | -0.04<br>(-1.91 to 1.84)  | -                         | -                         |
| <b>Moderate-Vigorous PA/day (mins)</b>                      | 5.67<br>(0.20 to 11.15)                               | 5.67<br>(-12.59 to 23.93) | -                         | -                         |

**Table 4:** Sample size calculations for a definite RCT with primary outcome of BMI sds at 24 months under different assumptions

|      | 80% Power                     |      |      | 90% Power                     |      |      |
|------|-------------------------------|------|------|-------------------------------|------|------|
|      | Minimum Difference Detectable |      |      | Minimum Difference Detectable |      |      |
| ICC  | 0.25                          | 0.30 | 0.50 | 0.25                          | 0.30 | 0.50 |
| 0.01 | 571                           | 397  | 145  | 764                           | 531  | 193  |
| 0.03 | 947                           | 658  | 240  | 1267                          | 880  | 320  |
| 0.06 | 1511                          | 1050 | 383  | 2021                          | 1404 | 511  |
| 0.10 | 2262                          | 1572 | 573  | 3027                          | 2103 | 765  |

<sup>1</sup>All numbers are the total number of children required to be recruited, assuming 50 children per school and a loss to follow-up at 24 months of 20%.

<sup>2</sup>The calculations take into account the reduction in variability associated with adjusting for baseline BMI sds, conservatively assuming the correlation between baseline and 24 months data to be 0.8 (in our pilot study this correlation was 0.93).

<sup>3</sup>This is the sample size required to detect a true minimal difference in BMI sds of 0.25, 0.3 or 0.5, assuming the standard deviation is 1.3 (based on our pilot data).

**Acknowledgements:** The authors are very grateful to the staff, pupils and parents of the 4 participating schools, who gave up their time for the study. We would also like to acknowledge Sandy Akerman (Headbangers Theatre Company) who supported the design of the drama component of the intervention and Stuart Logan who helped design the study and secure funding.

**Competing interests:** None

**Funding:** The Exploratory trial was funded by the NIHR Research for Patient Benefit (RfPB) Programme. JL and KW were partially supported by PenCLAHRC, the National Institute for Health Research (NIHR) CLAHRC for the Southwest Peninsula. This paper presents independent research commissioned by the National Institute for Health Research (NIHR). The views expressed are those of the author(s) and not necessarily those of the NHS, the NIHR or the Department of Health.

**Ethics approval:** Ethical approval was granted from the Peninsula College of Medicine and Dentistry Ethics Committee in 2008.

**Comment [j34]:** Not sure whether adding ethical procedures is necessary R1, comment 1.13

**Author contribution:** JL drafted the manuscript with KW and SC providing critical revision.

SC carried out the statistical analysis and drafted this section of the manuscript. JL developed and supported the design and production of the intervention materials, coordinated the implementation of the intervention and the collection of measurements at baseline, 18 and 24 months. JL, KW and SL designed the study and obtained funding. JL will act as guarantor of the paper

## References

1. Johnson B, Hackett AF. Eating habits of 11–14-year-old schoolchildren living in less affluent areas of Liverpool, UK. *J Hum Nutr Diet* 1997;**10**:135-44.
2. Owens J, Maxim R, McGuinn M, et al. Television-viewing Habits and Sleep Disturbance in School Children. *Pediatrics* 1999;**104**:e27.
3. Jackson-Leach R, Lobstein T. Estimated burden of paediatric obesity and co-morbidities in Europe. Part 1. The increase in the prevalence of child obesity in Europe is itself increasing. *Int J Pediatr Obes* 2006;**1**:26-32.
4. The NHS Information centre. Health Survey for England - 2008 Trend Tables. London: 2009.
5. National Child Measurement Programme. Results from the School Year 2009/10 Oxford: 2010.
6. Gunnell DJ, Frankel SJ, Nanchahal K, et al. Childhood obesity and adult cardiovascular mortality: a 57-y follow-up study based on the Boyd Orr cohort. *Am J Clin Nutr* 1998;**67**:1111-8.
7. Singh AS, Mulder C, Twisk JWR, et al. Tracking of childhood overweight into adulthood: a systematic review of the literature. *Obes Rev* 2008;**9**:474-88.
8. Hughes AR, Sherriff A, Lawlor DA, et al. Incidence of obesity during childhood and adolescence in a large contemporary cohort. *Prev Med* 2011;**52**:300-4.
9. Lake JK, Power C, Cole TJ. Child to adult body mass index in the 1958 British birth cohort: associations with parental obesity. *Arch Dis Child* 1997;**77**:376-80.
10. Li L, Law C, Lo Conte R, et al. Intergenerational influences on childhood body mass index: the effect of parental body mass index trajectories. *Am J Clin Nutr* 2009;**89**:551-7.
11. Nielsen SJ, Popkin BM. Patterns and trends in food portion sizes, 1977-1998. *JAMA* 2003;**289**:450-3.
12. National Travel Survey. Trends in personal travel trips, distance travelled and time taken per person per year: Great Britain, since 1972/73. London: 2010.
13. Molnár D, Livingstone B. Physical activity in relation to overweight and obesity in children and adolescents. *Eur J Pediatr* 2000;**159**:S45-S55.
14. Wareham N. Physical activity and obesity prevention. *Obes Rev* 2007;**8 Suppl 1**:109-14.
15. Riddoch CJ, Leary SD, Ness AR, et al. Prospective associations between objective measures of physical activity and fat mass in 12-14 year old children: the Avon Longitudinal Study of Parents and Children (ALSPAC). *BMJ* 2009;**339**.
16. Childwise. The Childwise Monitor Trends report 2010/11. Norwich: 2011.
17. Marshall SJ, Biddle SJ, Gorely T, et al. Relationships between media use, body fatness and physical activity in children and youth: a meta-analysis. *Int J Obes Relat Metab Disord* 2004;**28**:1238-46.

18. Wiecha JL, Peterson KE, Ludwig DS, et al. When Children Eat What They Watch: Impact of Television Viewing on Dietary Intake in Youth. *Arch Pediatr Adolesc Med* 2006;**160**:436-42.
19. Halford JCG, Gillespie J, Brown V, et al. Effect of television advertisements for foods on food consumption in children. *Appetite* 2004;**42**:221-5.
20. de Silva-Sanigorski A, Bolton K, Haby M, et al. Scaling up community-based obesity prevention in Australia: Background and evaluation design of the Health Promoting Communities: Being Active Eating Well initiative. *BMC Public Health* 2010;**10**:1-7.
21. de Silva-Sanigorski AM, Bell AC, Kremer P, et al. Reducing obesity in early childhood: results from Romp & Chomp, an Australian community-wide intervention program. *Am J Clin Nutr* 2010;**91**:831-40.
22. Brown T, Summerbell C. Systematic review of school-based interventions that focus on changing dietary intake and physical activity levels to prevent childhood obesity: an update to the obesity guidance produced by the National Institute for Health and Clinical Excellence. *Obes Rev* 2009;**10**:110-41.
23. Craig P, Dieppe P, Macintyre S, et al. Developing and evaluating complex interventions: the new Medical Research Council guidance. *BMJ* 2008;**337**:a1655.
24. Lloyd JJ, Logan S, Greaves CJ, et al. Evidence, Theory and Context - Using intervention mapping to develop a school-based intervention to prevent obesity in children. *Int J Behav Nutr Phys Act* 2011;**8**:73.
25. Wyatt KM, Lloyd JJ, Creanor S, et al. The development, feasibility and acceptability of a school-based obesity prevention programme: results from three phases of piloting. *BMJ Open* 2011. <http://bmjopen.bmj.com/content/early/2011/05/23/bmjopen-2010-000026.abstract> (accessed 13 September 2011).
26. Fisher JD, Fisher WA. The information-motivation-behavioral skills model. In: DiClemente R, Crosby R, Kegler M, eds. *Emerging theories in health promotion practice and research*. San Francisco: Jossey-Bass 2002:40-70.
27. Fisher JD, Fisher WA, Amico KR, et al. An Information-Motivation-Behavioral Skills Model of Adherence to Antiretroviral Therapy. *Health Psych* 2006;**25**:462-73.
28. Fisher JD, Fisher WA, Williams SS, et al. Empirical Tests of an Information-Motivation-Behavioral Skills Model of AIDS-Preventive Behavior With Gay Men and Heterosexual University Students. *Health Psych* 1994;**13**:238-50.
29. NICE. *Obesity: the prevention, identification, assessment and management of overweight and obesity in adults and children*. London: NICE 2006.
30. Bartholomew LK. *Planning health promotion programs: an intervention mapping approach*. San Francisco: Jossey-Bass 2006:171-459.
31. Abraham C, Michie S. A taxonomy of behavior change techniques used in interventions. *Health Psychol* 2008;**27**:379-87.
32. Stone MR, Rowlands AV, Eston RG. Characteristics of the activity pattern in normal weight and overweight boys. *Prev Med* 2009;**49**:205-8.
33. Kerry SM, Bland JM. Trials which randomize practices I: how should they be analysed? *Family Practice* 1998;**15**:80-3.
34. Donner A, Klar N. *Design and analysis of cluster randomization trials in health research*. London: Arnold 2000:1-178.
35. Bland JM, Kerry SM. Weighted comparison of means. *BMJ* 1998;**316**:129.
36. Campbell M, Elbourne D, Altman D. CONSORT statement: extension to cluster randomised trials. *BMJ* 2004;**328**:702 - 8.
37. Cole TJ, Freeman JV, Preece MA. Body mass index reference curves for the UK, 1990. *Arch Dis Child* 1995;**73**:25-9.
38. Taylor RW, McAuley KA, Barbezat W, et al. APPLE Project: 2-y findings of a community-based obesity prevention program in primary school age children. *Am J Clin Nutr* 2007;**86**:735-42.



- 1
- 2
- 3
- 4
- 5
- 6
- 7 39. Gortmaker SL, Peterson K, Wiecha J, et al. Reducing obesity via a school-based interdisciplinary intervention among youth: Planet Health. *Arch Pediatr Adolesc Med* 1999;**153**:409-18.
- 8
- 9 40. Caballero B, Clay T, Davis SM, et al. Pathways: a school-based, randomized controlled trial for the prevention of obesity in American Indian schoolchildren. *Am J Clin Nutr* 2003;**78**:1030-8.
- 10
- 11
- 12 41. Ford AL, Hunt LP, Cooper A, et al. What reduction in BMI SDS is required in obese adolescents to improve body composition and cardiometabolic health? *Arch Dis Child* 2009.
- 13
- 14 42. Foresight. Tackling obesities: future choices-project report. London: The Stationery Office 2007.
- 15
- 16 43. McCarthy HD, Cole TJ, Fry T, et al. Body fat reference curves for children. *Int J Obes* 2006;**30**:598-602.
- 17
- 18 44. McCarthy HD, Jarrett KV, Crawley HF. The development of waist circumference percentiles in British children aged 5.0-16.9 y. *Eur J Clin Nutr* 2001;**55**:902-7.
- 19
- 20
- 21
- 22
- 23
- 24
- 25
- 26
- 27
- 28
- 29
- 30
- 31
- 32
- 33
- 34
- 35
- 36
- 37
- 38
- 39
- 40
- 41
- 42
- 43
- 44
- 45
- 46
- 47
- 48
- 49
- 50
- 51
- 52
- 53
- 54
- 55
- 56
- 57
- 58
- 59
- 60

Figure 1: The HeLP Process Model

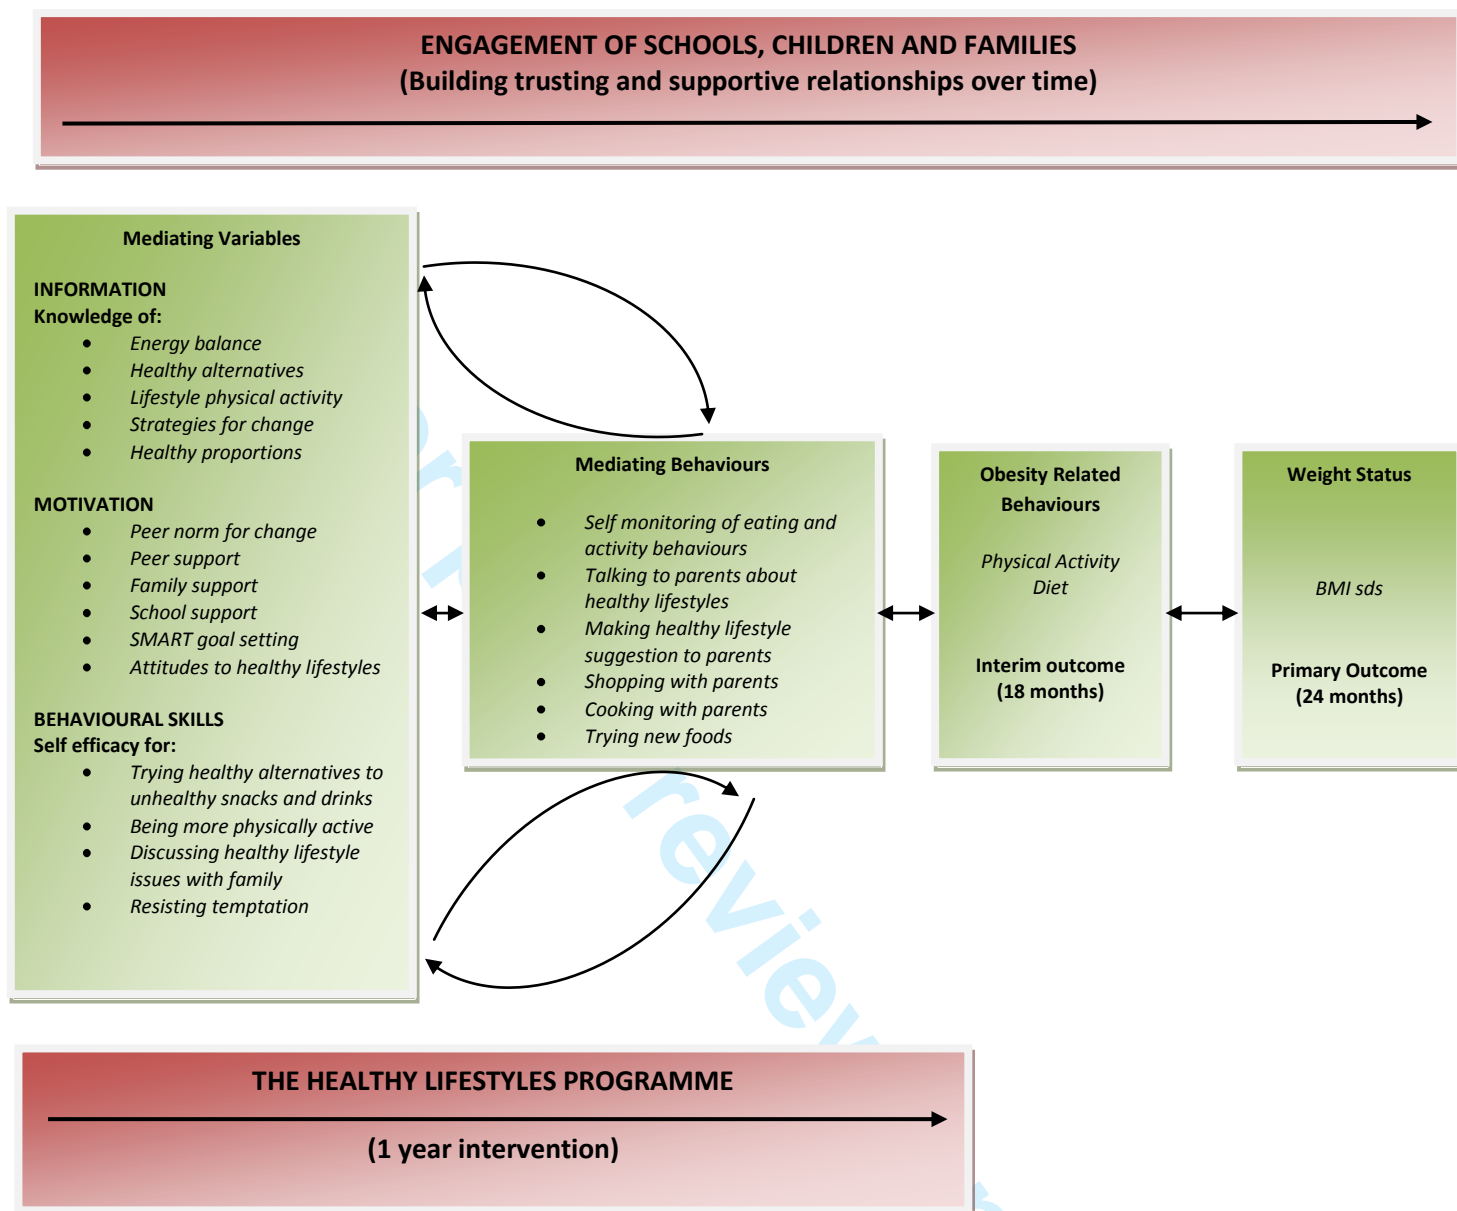

Figure 2: Flow chart of participants through the trial and numbers of children from which measures were collected.

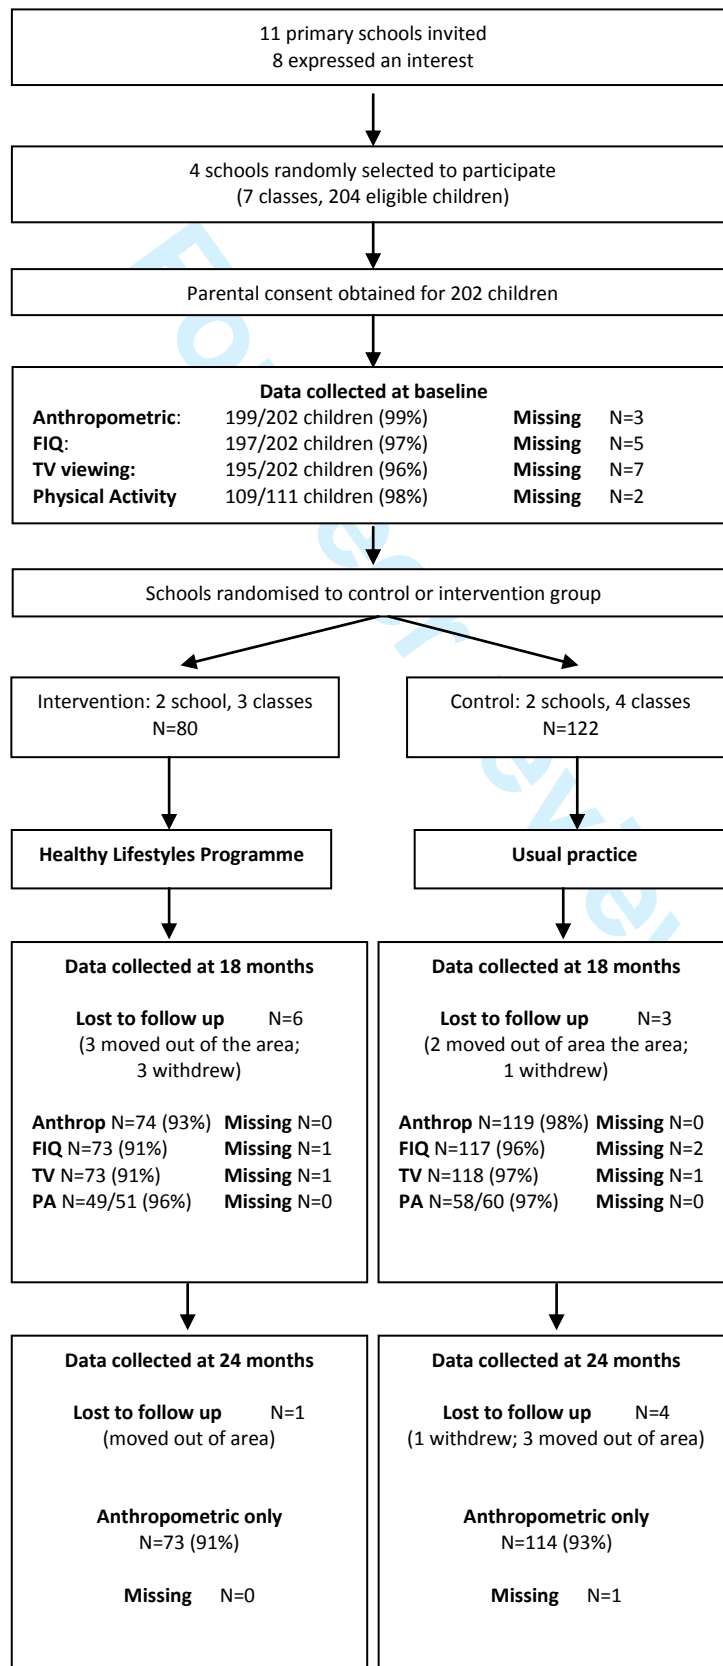

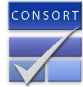

## CONSORT 2010 checklist of information to include when reporting a randomised trial\*

| Section/Topic                    | Item No | Checklist item                                                                                                                                                                              | Reported on page No |
|----------------------------------|---------|---------------------------------------------------------------------------------------------------------------------------------------------------------------------------------------------|---------------------|
| <b>Title and abstract</b>        |         |                                                                                                                                                                                             |                     |
|                                  | 1a      | Identification as a randomised trial in the title                                                                                                                                           | 2                   |
|                                  | 1b      | Structured summary of trial design, methods, results, and conclusions (for specific guidance see CONSORT for abstracts)                                                                     | 2                   |
| <b>Introduction</b>              |         |                                                                                                                                                                                             |                     |
| Background and objectives        | 2a      | Scientific background and explanation of rationale                                                                                                                                          | 5-7                 |
|                                  | 2b      | Specific objectives or hypotheses                                                                                                                                                           | 7                   |
| <b>Methods</b>                   |         |                                                                                                                                                                                             |                     |
| Trial design                     | 3a      | Description of trial design (such as parallel, factorial) including allocation ratio                                                                                                        | 7                   |
|                                  | 3b      | Important changes to methods after trial commencement (such as eligibility criteria), with reasons                                                                                          | n/a                 |
| Participants                     | 4a      | Eligibility criteria for participants                                                                                                                                                       | 8                   |
|                                  | 4b      | Settings and locations where the data were collected                                                                                                                                        | 8-10                |
| Interventions                    | 5       | The interventions for each group with sufficient details to allow replication, including how and when they were actually administered                                                       | 8-10 Table 1        |
| Outcomes                         | 6a      | Completely defined pre-specified primary and secondary outcome measures, including how and when they were assessed                                                                          | 10-11               |
|                                  | 6b      | Any changes to trial outcomes after the trial commenced, with reasons                                                                                                                       | n/a                 |
| Sample size                      | 7a      | How sample size was determined                                                                                                                                                              | n/a                 |
|                                  | 7b      | When applicable, explanation of any interim analyses and stopping guidelines                                                                                                                | n/a                 |
| <b>Randomisation:</b>            |         |                                                                                                                                                                                             |                     |
| Sequence generation              | 8a      | Method used to generate the random allocation sequence                                                                                                                                      | n/a                 |
|                                  | 8b      | Type of randomisation; details of any restriction (such as blocking and block size)                                                                                                         | n/a                 |
| Allocation concealment mechanism | 9       | Mechanism used to implement the random allocation sequence (such as sequentially numbered containers), describing any steps taken to conceal the sequence until interventions were assigned | 8                   |
| Implementation                   | 10      | Who generated the random allocation sequence, who enrolled participants, and who assigned participants to interventions                                                                     | 8                   |
| Blinding                         | 11a     | If done, who was blinded after assignment to interventions (for example, participants, care providers, those                                                                                | 10                  |

|    |                          |                                                                                                                     |                |
|----|--------------------------|---------------------------------------------------------------------------------------------------------------------|----------------|
| 1  |                          |                                                                                                                     |                |
| 2  |                          | assessing outcomes) and how                                                                                         |                |
| 3  |                          |                                                                                                                     |                |
| 4  |                          | 11b If relevant, description of the similarity of interventions                                                     | n/a            |
| 5  | Statistical methods      | 12a Statistical methods used to compare groups for primary and secondary outcomes                                   | 12-13          |
| 6  |                          | 12b Methods for additional analyses, such as subgroup analyses and adjusted analyses                                | 12-13          |
| 7  |                          |                                                                                                                     |                |
| 8  | <b>Results</b>           |                                                                                                                     |                |
| 9  | Participant flow (a      | 13a For each group, the numbers of participants who were randomly assigned, received intended treatment, and        | 13 and Fig 2   |
| 10 | diagram is strongly      | were analysed for the primary outcome                                                                               |                |
| 11 | recommended)             | 13b For each group, losses and exclusions after randomisation, together with reasons                                | Fig 2          |
| 12 | Recruitment              | 14a Dates defining the periods of recruitment and follow-up                                                         | Fig 2          |
| 13 |                          | 14b Why the trial ended or was stopped                                                                              | n/a            |
| 14 |                          |                                                                                                                     |                |
| 15 | Baseline data            | 15 A table showing baseline demographic and clinical characteristics for each group                                 | Table 2        |
| 16 | Numbers analysed         | 16 For each group, number of participants (denominator) included in each analysis and whether the analysis was      | 13             |
| 17 |                          | by original assigned groups                                                                                         |                |
| 18 |                          |                                                                                                                     |                |
| 19 | Outcomes and             | 17a For each primary and secondary outcome, results for each group, and the estimated effect size and its           | 13- 16 Table 3 |
| 20 | estimation               | precision (such as 95% confidence interval)                                                                         |                |
| 21 |                          | 17b For binary outcomes, presentation of both absolute and relative effect sizes is recommended                     | n/a            |
| 22 | Ancillary analyses       | 18 Results of any other analyses performed, including subgroup analyses and adjusted analyses, distinguishing       | n/a            |
| 23 |                          | pre-specified from exploratory                                                                                      |                |
| 24 |                          |                                                                                                                     |                |
| 25 | Harms                    | 19 All important harms or unintended effects in each group (for specific guidance see CONSORT for harms)            | n/a            |
| 26 |                          |                                                                                                                     |                |
| 27 | <b>Discussion</b>        |                                                                                                                     |                |
| 28 | Limitations              | 20 Trial limitations, addressing sources of potential bias, imprecision, and, if relevant, multiplicity of analyses | 4              |
| 29 | Generalisability         | 21 Generalisability (external validity, applicability) of the trial findings                                        | 15-16          |
| 30 | Interpretation           | 22 Interpretation consistent with results, balancing benefits and harms, and considering other relevant evidence    | 15-16          |
| 31 |                          |                                                                                                                     |                |
| 32 | <b>Other information</b> |                                                                                                                     |                |
| 33 | Registration             | 23 Registration number and name of trial registry                                                                   | n/a            |
| 34 | Protocol                 | 24 Where the full trial protocol can be accessed, if available                                                      | n/a            |
| 35 | Funding                  | 25 Sources of funding and other support (such as supply of drugs), role of funders                                  | 24             |
| 36 |                          |                                                                                                                     |                |

37

38 \*We strongly recommend reading this statement in conjunction with the CONSORT 2010 Explanation and Elaboration for important clarifications on all the items. If relevant, we also

39 recommend reading CONSORT extensions for cluster randomised trials, non-inferiority and equivalence trials, non-pharmacological treatments, herbal interventions, and pragmatic trials.

40 Additional extensions are forthcoming: for those and for up to date references relevant to this checklist, see [www.consort-statement.org](http://www.consort-statement.org).

41

42



**Behavioural and weight status outcomes from an exploratory trial of the Healthy Lifestyles Programme (HeLP): A novel school-based obesity prevention programme**

|                                 |                                                                                                                                                                                                                                                                                                                                                   |
|---------------------------------|---------------------------------------------------------------------------------------------------------------------------------------------------------------------------------------------------------------------------------------------------------------------------------------------------------------------------------------------------|
| Journal:                        | <i>BMJ Open</i>                                                                                                                                                                                                                                                                                                                                   |
| Manuscript ID:                  | bmjopen-2011-000390.R2                                                                                                                                                                                                                                                                                                                            |
| Article Type:                   | Research                                                                                                                                                                                                                                                                                                                                          |
| Date Submitted by the Author:   | 02-Mar-2012                                                                                                                                                                                                                                                                                                                                       |
| Complete List of Authors:       | Lloyd, Jennifer; Peninsula College of Medicine and Dentistry, Institute for Health Service Research, University of Exeter<br>Wyatt, Katrina; Peninsula College of Medicine and Dentistry, Institute for Health Service Research, University of Exeter<br>Creanor, Siobhan; University of Plymouth, Centre for Health and Environmental Statistics |
| <b>Primary Subject Heading</b>: | Public health                                                                                                                                                                                                                                                                                                                                     |
| Secondary Subject Heading:      | Health services research, Paediatrics, Nutrition and metabolism                                                                                                                                                                                                                                                                                   |
| Keywords:                       | PUBLIC HEALTH, PREVENTIVE MEDICINE, Community child health < PAEDIATRICS                                                                                                                                                                                                                                                                          |
|                                 |                                                                                                                                                                                                                                                                                                                                                   |

SCHOLARONE™  
Manuscripts

Figure 1: The HeLP Process Model

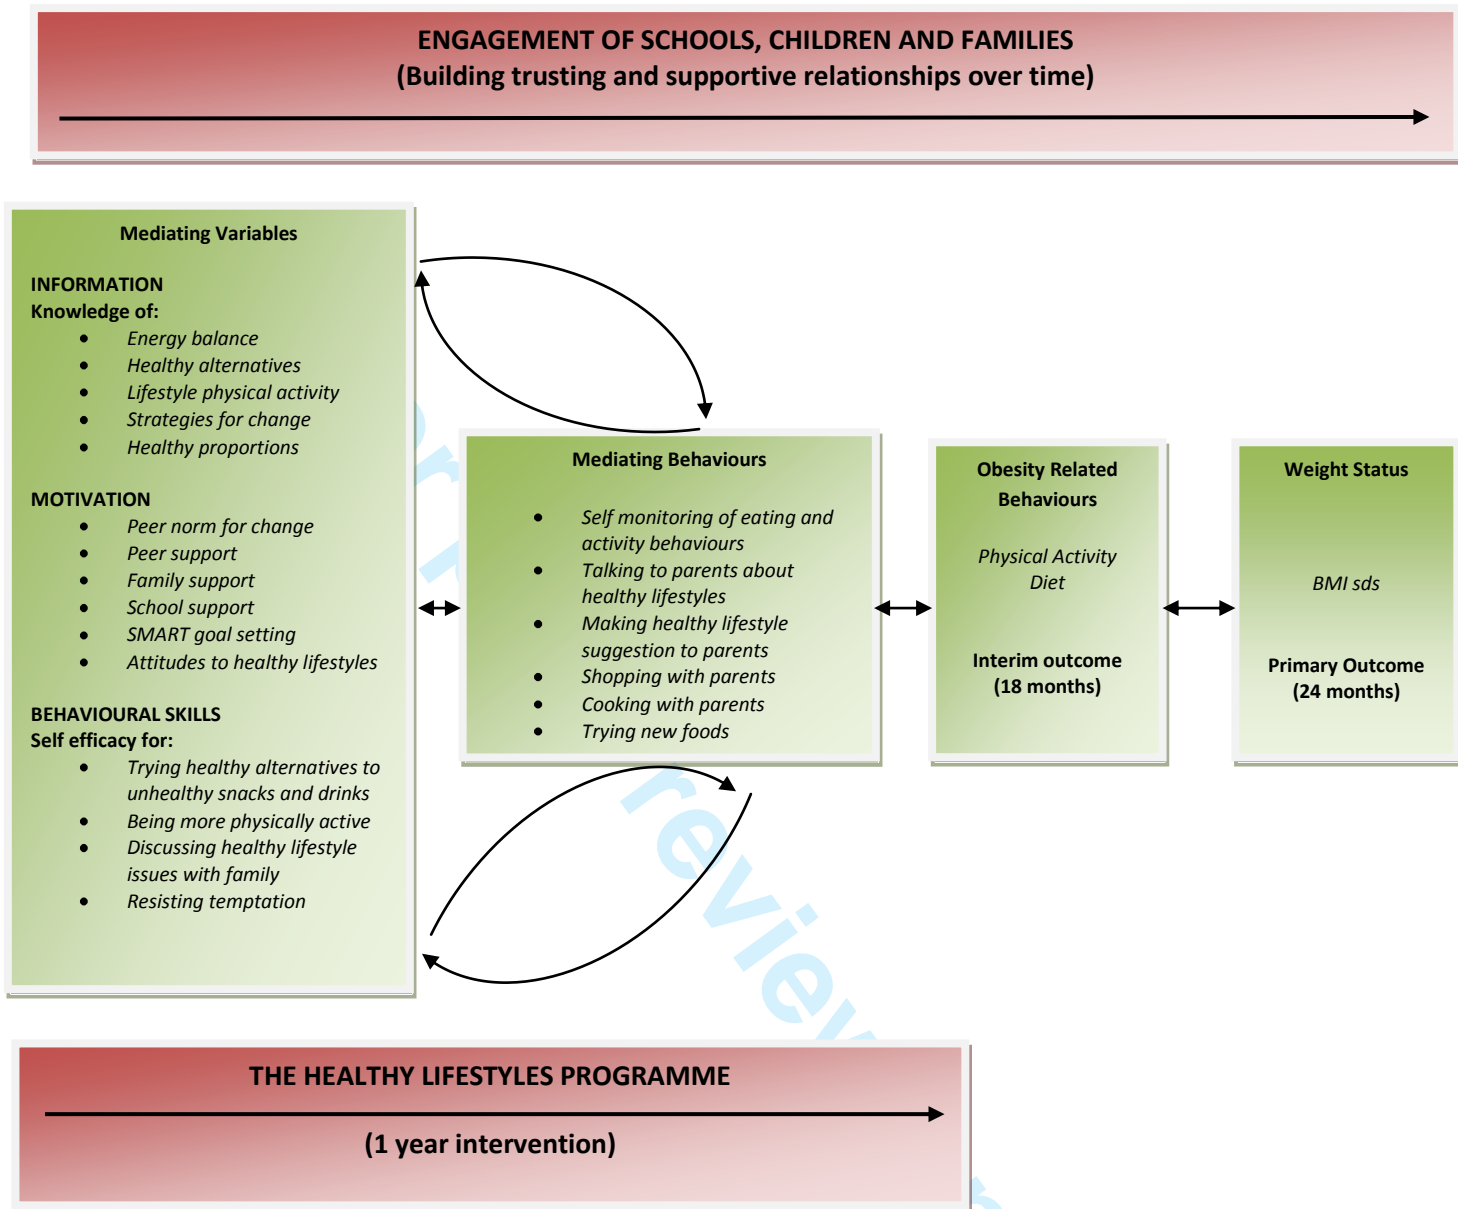

Figure 2: Flow chart of participants through the trial and numbers of children from which measures were collected.

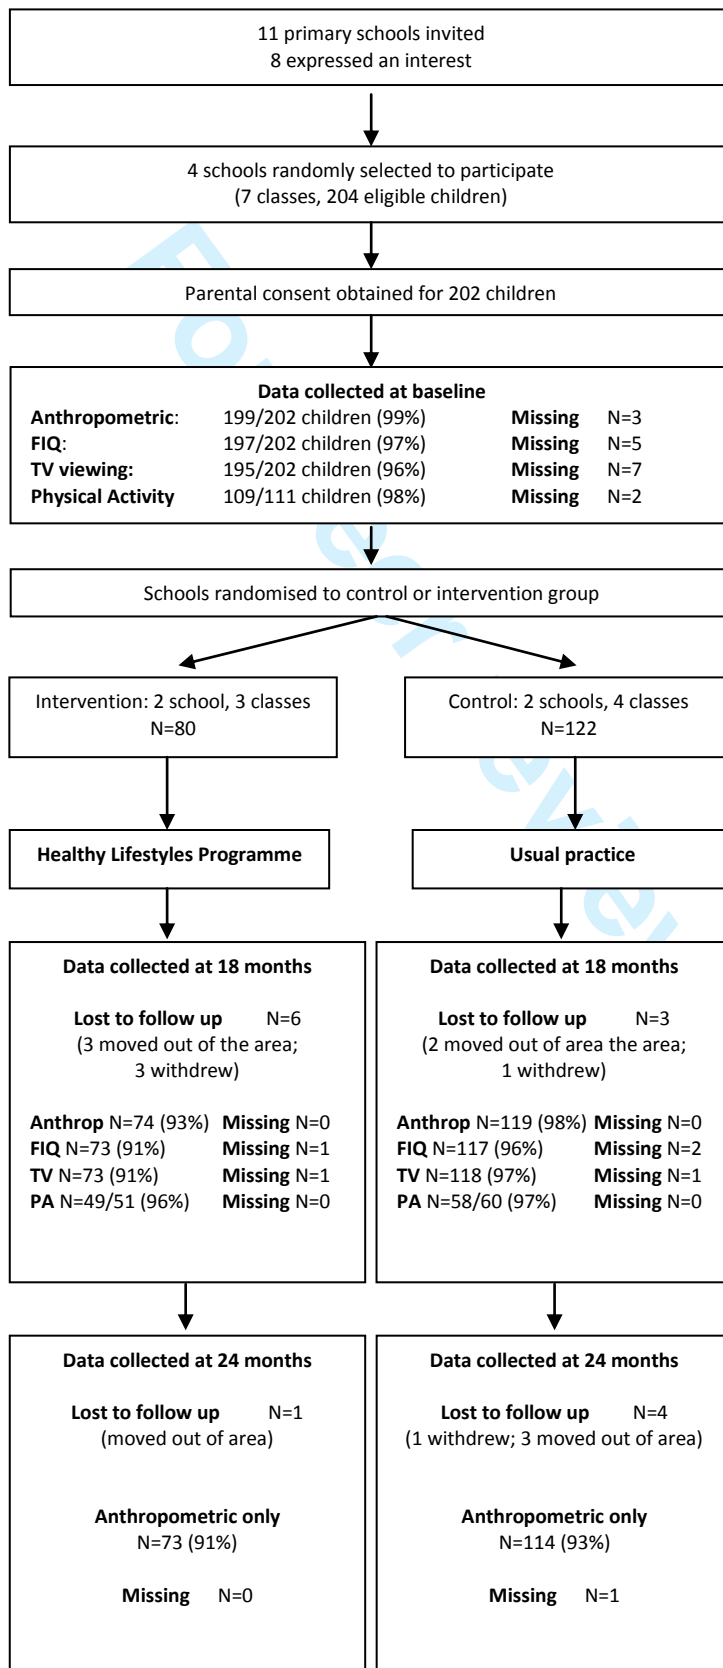





## CONSORT 2010 checklist of information to include when reporting a randomised trial\*

| Section/Topic                    | Item No | Checklist item                                                                                                                                                                              | Reported on page No |
|----------------------------------|---------|---------------------------------------------------------------------------------------------------------------------------------------------------------------------------------------------|---------------------|
| <b>Title and abstract</b>        |         |                                                                                                                                                                                             |                     |
|                                  | 1a      | Identification as a randomised trial in the title                                                                                                                                           | 2                   |
|                                  | 1b      | Structured summary of trial design, methods, results, and conclusions (for specific guidance see CONSORT for abstracts)                                                                     | 2                   |
| <b>Introduction</b>              |         |                                                                                                                                                                                             |                     |
| Background and objectives        | 2a      | Scientific background and explanation of rationale                                                                                                                                          | 5-7                 |
|                                  | 2b      | Specific objectives or hypotheses                                                                                                                                                           | 7                   |
| <b>Methods</b>                   |         |                                                                                                                                                                                             |                     |
| Trial design                     | 3a      | Description of trial design (such as parallel, factorial) including allocation ratio                                                                                                        | 7                   |
|                                  | 3b      | Important changes to methods after trial commencement (such as eligibility criteria), with reasons                                                                                          | n/a                 |
| Participants                     | 4a      | Eligibility criteria for participants                                                                                                                                                       | 8                   |
|                                  | 4b      | Settings and locations where the data were collected                                                                                                                                        | 8-10                |
| Interventions                    | 5       | The interventions for each group with sufficient details to allow replication, including how and when they were actually administered                                                       | 8-10 Table 1        |
| Outcomes                         | 6a      | Completely defined pre-specified primary and secondary outcome measures, including how and when they were assessed                                                                          | 10-11               |
|                                  | 6b      | Any changes to trial outcomes after the trial commenced, with reasons                                                                                                                       | n/a                 |
| Sample size                      | 7a      | How sample size was determined                                                                                                                                                              | n/a                 |
|                                  | 7b      | When applicable, explanation of any interim analyses and stopping guidelines                                                                                                                | n/a                 |
| <b>Randomisation:</b>            |         |                                                                                                                                                                                             |                     |
| Sequence generation              | 8a      | Method used to generate the random allocation sequence                                                                                                                                      | n/a                 |
|                                  | 8b      | Type of randomisation; details of any restriction (such as blocking and block size)                                                                                                         | n/a                 |
| Allocation concealment mechanism | 9       | Mechanism used to implement the random allocation sequence (such as sequentially numbered containers), describing any steps taken to conceal the sequence until interventions were assigned | 8                   |
| Implementation                   | 10      | Who generated the random allocation sequence, who enrolled participants, and who assigned participants to interventions                                                                     | 8                   |
| Blinding                         | 11a     | If done, who was blinded after assignment to interventions (for example, participants, care providers, those                                                                                | 10                  |

|                                                      |     |                                                                                                                                                   |                |
|------------------------------------------------------|-----|---------------------------------------------------------------------------------------------------------------------------------------------------|----------------|
|                                                      |     | assessing outcomes) and how                                                                                                                       |                |
|                                                      | 11b | If relevant, description of the similarity of interventions                                                                                       | n/a            |
| Statistical methods                                  | 12a | Statistical methods used to compare groups for primary and secondary outcomes                                                                     | 12-13          |
|                                                      | 12b | Methods for additional analyses, such as subgroup analyses and adjusted analyses                                                                  | 12-13          |
| <b>Results</b>                                       |     |                                                                                                                                                   |                |
| Participant flow (a diagram is strongly recommended) | 13a | For each group, the numbers of participants who were randomly assigned, received intended treatment, and were analysed for the primary outcome    | 13 and Fig 2   |
|                                                      | 13b | For each group, losses and exclusions after randomisation, together with reasons                                                                  | Fig 2          |
| Recruitment                                          | 14a | Dates defining the periods of recruitment and follow-up                                                                                           | Fig 2          |
|                                                      | 14b | Why the trial ended or was stopped                                                                                                                | n/a            |
| Baseline data                                        | 15  | A table showing baseline demographic and clinical characteristics for each group                                                                  | Table 2        |
| Numbers analysed                                     | 16  | For each group, number of participants (denominator) included in each analysis and whether the analysis was by original assigned groups           | 13             |
| Outcomes and estimation                              | 17a | For each primary and secondary outcome, results for each group, and the estimated effect size and its precision (such as 95% confidence interval) | 13- 16 Table 3 |
|                                                      | 17b | For binary outcomes, presentation of both absolute and relative effect sizes is recommended                                                       | n/a            |
| Ancillary analyses                                   | 18  | Results of any other analyses performed, including subgroup analyses and adjusted analyses, distinguishing pre-specified from exploratory         | n/a            |
| Harms                                                | 19  | All important harms or unintended effects in each group (for specific guidance see CONSORT for harms)                                             | n/a            |
| <b>Discussion</b>                                    |     |                                                                                                                                                   |                |
| Limitations                                          | 20  | Trial limitations, addressing sources of potential bias, imprecision, and, if relevant, multiplicity of analyses                                  | 4              |
| Generalisability                                     | 21  | Generalisability (external validity, applicability) of the trial findings                                                                         | 15-16          |
| Interpretation                                       | 22  | Interpretation consistent with results, balancing benefits and harms, and considering other relevant evidence                                     | 15-16          |
| <b>Other information</b>                             |     |                                                                                                                                                   |                |
| Registration                                         | 23  | Registration number and name of trial registry                                                                                                    | n/a            |
| Protocol                                             | 24  | Where the full trial protocol can be accessed, if available                                                                                       | n/a            |
| Funding                                              | 25  | Sources of funding and other support (such as supply of drugs), role of funders                                                                   | 24             |

\*We strongly recommend reading this statement in conjunction with the CONSORT 2010 Explanation and Elaboration for important clarifications on all the items. If relevant, we also recommend reading CONSORT extensions for cluster randomised trials, non-inferiority and equivalence trials, non-pharmacological treatments, herbal interventions, and pragmatic trials. Additional extensions are forthcoming: for those and for up to date references relevant to this checklist, see [www.consort-statement.org](http://www.consort-statement.org).

1  
2  
3  
4  
5  
6  
7 Behavioural and weight status outcomes from an exploratory trial of the Healthy Lifestyles  
8 Programme (HeLP): A novel school-based obesity prevention programme

9  
10 Author names and affiliations:

11 \*Jennifer J Lloyd<sup>1</sup> Katrina M Wyatt<sup>1</sup> Siobhan Creanor<sup>2</sup>

12  
13 <sup>1,2</sup>Institute for Health Service Research, Peninsula College of Medicine and Dentistry,  
14 University of Exeter, Exeter, UK

15  
16 <sup>2</sup>Centre for Health & Environmental Statistics, University of Plymouth, Plymouth, UK

17  
18  
19 Email addresses:

20  
21 \*JL: [jennifer.lloyd@pms.ac.uk](mailto:jennifer.lloyd@pms.ac.uk)

22  
23 KMW: [katrina.wyatt@pms.ac.uk](mailto:katrina.wyatt@pms.ac.uk)

24  
25 SC: [siobhan.creanor@plymouth.ac.uk](mailto:siobhan.creanor@plymouth.ac.uk)

26  
27  
28  
29  
30 \*Corresponding author: Tel: 01392 722972 Fax: 01392 421009

31  
32 The Corresponding Author has the right to grant on behalf of all authors and does grant on  
33 behalf of all authors, an exclusive licence (or non-exclusive for government employees) on a  
34 worldwide basis to the BMJ Publishing Group Ltd and its Licensees to permit this article (if  
35 accepted) to be published in Archives of Disease in Childhood and any other BMJ PGL  
36 products to exploit all subsidiary rights, as set out in our licence

37  
38  
39  
40  
41  
42  
43  
44 Key words

45  
46 Obesity; Prevention; Intervention; Drama; Schools; Children; Exploratory trial

47  
48 Word count 3,815

**ABSTRACT**

Objectives: To assess the behavioural and weight status outcomes in English children in a feasibility study of a novel primary school-based obesity prevention programme.

Design: Exploratory cluster randomised controlled trial of the Healthy Lifestyles Programme (HeLP).

Setting: Four city primary schools (2 control, 2 intervention) in the South West of England.

Participants: 202 9-10 year old children, of which 193 and 188 were followed up at 18 and 24 months respectively. No child was excluded from the study; however, to be eligible, schools were required to have at least one single Year 5 class.

Intervention: Four phase multi-component programme using a range of school-based activities including lessons, assemblies, parents' evenings, interactive drama workshops and goal-setting to engage and support schools, children and their families in healthy lifestyle behaviours. It runs over the spring and summer term of Year 5 and the autumn term of Year 6).

Primary and secondary outcomes: Weight status outcomes were BMI, waist circumference and body fat sds at 18 and 24 months and behavioural outcomes were physical activity, TV viewing/screen time and food intake at 18 months.

Results: At 18 months follow-up, intervention children , consumed less energy dense snacks and more healthy snacks, had fewer `negative food

1  
2  
3  
4  
5  
6  
7 markers', more 'positive food markers', lower mean TV/screen time and  
8  
9 spent more time doing Moderate-Vigorous Physical Activity (MVPA) each  
10  
11 day than children in the control schools. Intervention children had lower  
12  
13 anthropometric measures at 18 and 24 months than control children, with  
14  
15 larger differences at 24 months than at 18 months for nearly all  
16  
17 measures.

18  
19 Conclusion: Results from this exploratory trial show consistent positive  
20  
21 changes in favour of the intervention across all targeted behaviours  
22  
23 which, in turn, appear to affect weight status and body shape. A definitive  
24  
25 trial is now justified.  
26  
27  
28  
29

#### 30 Article focus

- 31  
32 • To present behavioural and weight status outcomes from an exploratory cluster  
33  
34 randomised controlled trial of a novel school-based obesity prevention programme  
35  
36 with English primary school children
- 37  
38 • To present sample size estimates required for a definitive trial of the Programme  
39  
40 based on outcome results, attrition rates and estimates of the intraclass correlations  
41  
42 of the outcome measures  
43  
44

#### 45 Key messages

- 46  
47 • HeLP has been developed using behaviour change theory and extensive stakeholder  
48  
49 involvement to engage and support children and their families in healthy lifestyles  
50  
51  
52  
53  
54  
55

- Behavioural and weight status outcomes at 18 and 24 months from this exploratory trial (Phase 3 pilot) show consistency in the direction of effects, all in favour of the intervention, demonstrating 'proof of concept'
- Results from the exploratory trial have provided sufficient evidence to support the evaluation of HeLP in a full scale trial

### Strengths and Limitations

Strengths: The HeLP intervention has undergone a systematic development process using research evidence, behavioural theory, stakeholder consultation and piloting. This has enabled the researchers to gain a deeper understanding of the context in which the intervention was to be delivered in order to maximize engagement at all levels. The exploratory trial presented in this paper (phase 3 pilot) has demonstrated that not only is the design of the trial feasible, with outcome data obtained from 92% of the original cohort at 24 months after transition to secondary school, but also that behavioural and weight status outcome measures at 18 and 24 months show consistency in the direction of effects (although the differences are relatively small), all in favour of the intervention, demonstrating 'proof of concept'. This shows that a definitive trial of HeLP is both feasible and justified.

Limitations: The study was based in the South West of England which is predominantly white, and although, there are areas of deprivation, none of the 4 schools had  $\geq 25\%$  of children eligible for free school meals (the national average of proportion of children eligible for free school meals). However, the intervention has been developed to allow the flexibility and adaptation to ensure it is recognising and responding to the local needs of children and

1  
2  
3  
4  
5  
6 families from different socio-economic and ethnic groups whilst still maintaining fidelity.  
7

8 Food intake [1] and TV viewing/screen time [2] were self report and, although children were  
9 asked to sit in their literacy tables so that appropriate support could be provided to each  
10 child during completion, the information children are able to provide is limited. We did,  
11 however, go to great lengths to ensure that the questionnaires were simple and presented  
12 in such a way so as to trigger recall.  
13  
14  
15  
16  
17  
18  
19  
20  
21  
22  
23  
24  
25  
26  
27  
28  
29  
30  
31  
32  
33  
34  
35  
36  
37  
38  
39  
40  
41  
42  
43  
44  
45  
46  
47  
48  
49  
50  
51  
52  
53  
54  
55  
56  
57  
58  
59  
60

## INTRODUCTION

During the last three decades, the prevalence of obesity in children in Europe has risen dramatically [3]. In the UK, The Health Survey for England reported that 19% of girls and 18% of boys aged 11-15 were obese and 34% of girls and 33% of boys were overweight or obese [4]. The National Child Measurement Programme in England (NCMP) reported that by age 10-11 years, one in three children were either overweight or obese [5]. Being overweight in childhood is associated with adverse consequences including metabolic abnormalities, increased risk of Type II diabetes and musculo-skeletal and psychological problems [6]. A recent systematic review showed that the risk of overweight children becoming overweight adults was at least twice as high as for normal weight children [7] and more contemporary data, from a large prospective cohort of children born in the South-West of England in 1991/1992 (ALSPAC), showed that the four year incidence of obesity was higher between the ages of 7 and 11 years than between 11 and 15 years, suggesting that mid to late childhood (around 7-11 years) may merit greater attention in future obesity prevention interventions [8].

Obesity results from an imbalance between consumption and expenditure of energy. Epidemiological studies suggest a number of risk factors, the strongest of which is having one or more overweight parents [9]. There are also strong associations between the risk of overweight and socio-economic status, diet, physical activity levels and other lifestyle factors [10]. At a population level, the consumption of processed and fast food, including sweetened fizzy drinks, has increased while that of fruit and vegetables has declined and portion size in pre-packaged food has increased substantially [11]. In addition, the National



1  
2  
3  
4  
5  
6  
7 Travel Survey [12] has shown that, since the 1970s, children's transport activity (e.g. walking  
8 or cycling to school) has been in decline.  
9

10  
11  
12 Evidence about the relationship between physical activity, sedentary behaviours and  
13 childhood obesity is scarce with reviews of physical activity and obesity prevention  
14 reporting inconsistent results [13, 14]. Using data from the Avon Longitudinal Study of  
15 Parents and Children (ALSPAC), Riddoch and colleagues found strong associations between  
16 children's fat mass at age 14 and their physical activity at age 12 [15]. Compared to previous  
17 generations, children in the UK spend more time participating in sedentary activities; with  
18 research suggesting that children spend an average of 4.5 hours a day looking at a screen  
19 [16]. Some studies have reported an association between time spent watching television  
20 and obesity [17]. Not only is television viewing a sedentary activity but it is also positively  
21 correlated with total calorific intake [18] and the consumption of snack foods [19].  
22  
23  
24  
25  
26  
27  
28  
29  
30  
31  
32

33  
34  
35 Schools have the potential to play a critical role in the prevention of overweight and obesity  
36 and the more recent development of community-wide multisite approaches often use  
37 school-based interventions as part of the overall programme of events [20, 21]. Schools'  
38 existing organisational, social and communication structures provide opportunities for  
39 regular health education and for the creation of a health enhancing environment and, if  
40 school-based interventions are developed in a systematic way involving stakeholders and  
41 appropriate piloting phases, they have the potential to reach children and their families  
42 across the social spectrum. The most recent systematic review (2008) of controlled trials of  
43 school-based interventions concluded that interventions which aim to increase activity and  
44  
45  
46  
47  
48  
49  
50  
51  
52  
53  
54

1  
2  
3  
4  
5  
6  
7 reduce sedentary behaviour and affect diet may be more effective in preventing children  
8 becoming overweight in the long term [22].  
9

10  
11  
12 The Healthy Lifestyle Programme (HeLP) is an innovative school-based intervention that  
13 aims to deliver a general healthy lifestyle message encouraging a healthy energy balance.  
14  
15 The Programme takes a population approach, seeking to change behaviour at a family as  
16 well as at an individual and school level. The development of HeLP followed the MRC  
17 guidance for the development and evaluation of complex interventions [23] involving  
18 careful theoretical derivation of behaviour change techniques [24] and three phases of  
19 iterative pilot work [25]. Phase 3 was the exploratory randomised controlled trial, to assess,  
20 for schools, children and their families: recruitment and retention in control and  
21 intervention schools; feasibility and acceptability of the intervention and of future trial  
22 outcomes measures, and facilitators and barriers to uptake of the intervention. In addition,  
23 data from this trial would help us in calculating the sample size required for a full scale trial.  
24  
25 Here we present the behavioural and weight status outcomes from the exploratory  
26 randomised controlled trial and the estimation of the sample size required for a definitive  
27 evaluation of the Programme.  
28  
29  
30  
31  
32  
33  
34  
35  
36  
37  
38  
39  
40  
41  
42

## 43 **METHODS**

### 44 **Study design**

45  
46 An exploratory cluster randomised controlled trial of the HeLP intervention, in Exeter (a city  
47 in the South West of England) involving 202 9-10 year old children. There is little ethnic mix  
48 in the South West, with the majority of the population being 'white'. Although overall socio-  
49 economic status for the area is higher than average, within Exeter there are some areas with  
50  
51  
52  
53  
54

1  
2  
3  
4  
5  
6  
7 quite severe deprivation. All state Primary and Junior schools in Exeter were eligible to take  
8  
9 part if they had at least one single age year 5 class (9-10 year olds) (i.e. not mixed classes, 8-  
10  
11 10 or 9-11 year olds). Schools were recruited via the local network of Primary school head  
12  
13 teachers. Of the 11 eligible schools in Exeter, eight expressed an interest from which four  
14  
15 schools (with a total of 7 Year 5 classes) were randomly selected to participate and  
16  
17 randomly allocated to intervention or control using a telephone based randomisation  
18  
19 service involving a statistician independent of the research. All parents of children were sent  
20  
21 an information pack with an opportunity to opt out of the study. If the opt out form was not  
22  
23 returned within 2 weeks consent was inferred. The class teacher gave daily oral reminders  
24  
25 to the children over this 2 week period to ensure that they and their parents had read the  
26  
27 information sheet. Baseline measures were taken prior to schools being randomised to  
28  
29 control or intervention groups.

### 31 Intervention

32  
33 HeLP is a multi-component 4 phase programme delivered to 9-10 year olds over 3 school  
34  
35 terms (Spring and Summer term of year 5 and Autumn term of year 6). The Programme is  
36  
37 based on the Information, Motivation and Behavioural Skills Model (IMB) [26] which  
38  
39 proposes that adequate information, motivation and behavioural skills are essential to  
40  
41 behaviour change. IMB has been demonstrated to provide an effective basis for behaviour  
42  
43 change interventions in other domains [27, 28] and aims to deliver a general healthy  
44  
45 lifestyle message encouraging a healthy energy balance. Within this context, three key  
46  
47 behaviours are emphasised: a decrease in the consumption of sweetened fizzy drinks; an  
48  
49 increase in the proportion of healthy snacks to unhealthy snacks consumed, and a reduction  
50  
51 in TV viewing and other screen-based activities. These messages are consistent with the  
52  
53 strategies suggested in the UK NICE guidance on the prevention of overweight and obesity  
54

Comment [j1]: R1, more information added

1  
2  
3  
4  
5  
6  
7 in adults and children [29]. We hypothesise that targeting information, motivation and  
8 behavioural skills will lead to the adoption of mediating behaviours which will, in turn, lead  
9 to improvements in diet and physical activity thus preventing excessive weight gain. These  
10 mediating variables and behaviours will interact to strengthen the engagement of children  
11 and their parents throughout the course of the intervention. Figure 1 provides a  
12 representation of this process indicating the feedback loops.  
13  
14  
15  
16  
17  
18

19 *Insert Fig 1*

20  
21 An Intervention Mapping (IM) approach [30,], involving considerable stakeholder  
22 consultation and pilot work, was undertaken to link theory to specific behaviour change  
23 techniques (BCTs) [31, 32] and methods of delivery [24] that were suitably engaging and  
24 compatible with the existing school curriculum. Table 1 shows each phase of HeLP, the  
25 targets of change, the BCTS used and the method and agent of delivery. Key to engaging and  
26 motivating the children are the highly inclusive and interactive drama activities, which are  
27 built around 4 characters (Disorganised Duncan, Football Freddie, Snacky Sam and Active  
28 Amy) with whom the children identify. During the Healthy Lifestyles Week (Phase 2) children  
29 work closely with the character most like them to help them to change their behaviours. In  
30 Phase 3, the children reflect on their own lifestyle behaviours around diet and activity and  
31 set simple goals with their parents. The Programme has been specifically designed so that  
32 the *function* of each phase is clearly defined and delivered appropriately while the precise  
33 content can be adapted to relate to children from differing ethnic and social backgrounds.  
34  
35 During the drama workshops children cocreate scenes with the actors and provide their  
36 own ideas and solutions to problems faced by the characters.  
37  
38  
39  
40  
41  
42  
43  
44  
45  
46  
47  
48  
49  
50  
51

52 *Insert table 1*

**Comment [j2]:** R1. Reference to the new taxonomy. Michie et al., 2011

**Outcome measures**

Baseline height, weight, waist circumference, % body fat, food intake, TV viewing/screen-based activity and physical activity were collected at the start of the school year, in the Autumn term (October/November, 2008) prior to randomisation of schools. These same measures were then collected 18 months post baseline (June/ July 2009) and anthropometric measures only were collected 24 months post baseline (October/November 2010), after the children had moved to secondary school.

*Anthropometric*

All anthropometric measures were taken by an independent assessor who was blinded to each child's allocated group. For the anthropometric measures children were asked to remove their shoes and socks. Height was measured using a portable SECA stadiometer (Hamburg, Germany) and recorded to an accuracy of 1mm. Weight and body fatness was measured using the Tanita SC330 portable body composition analyser (U.K. Ltd., Middlesex, U.K.). Weight was recorded to within 0.1kg. Body fatness was estimated from leg to leg bioelectrical impedance. Waist circumference was measured using a non-elastic flexible tape 4cm above the umbilicus.

*Behavioural*

Food intake was assessed using an adapted version of the validated Food Intake Questionnaire (FIQ) [1], a recall method which asks whether specific foods were consumed the previous day. Children completed the FIQ twice, during school hours, in order to obtain a weekday and weekend food intake. These results were then combined and weighted to calculate the mean number of different healthy snacks (HS), energy dense snacks (EDS), positive (PM) and negative (NM) foods consumed each day. TV viewing/screen based usage

1  
2  
3  
4  
5  
6  
7 was assessed using an adapted version of the validated Children's TV Viewing Habits  
8  
9 Questionnaire [2]. Participants were asked to record the time (in minutes) they usually  
10  
11 spent watching TV or doing other leisure time screen-based activities on weekdays before  
12  
13 school, before tea and after tea and on the weekend (Saturday and Sunday morning,  
14  
15 afternoon and evening). The results were then combined and weighted to calculate the  
16  
17 mean time spent watching TV/doing leisure time screen-based activities each day.  
18  
19 Additional information on the number and location of TV sets and rules in the home  
20  
21 regarding TV viewing and screen based usage was also collected.  
22  
23  
24

25  
26 Questionnaires were completed during class time, where children were asked to sit in their  
27  
28 literacy groups (table groupings based on their ability in literacy). JL instructed the class on  
29  
30 how to complete the questionnaires and, with the class teacher, learning support assistant  
31  
32 and an additional researcher, assisted individual children where necessary. Physical activity  
33  
34 was measured in one randomly selected class per school using a GT1M Actigraph (Actigraph  
35  
36 LLC, Pensacola, FL:<http://www.theactigraph.com>), attached to a flexible elastic belt  
37  
38 fastened securely round the waist, which children were asked to wear during waking hours  
39  
40 over seven consecutive days (5 weekdays and one weekend). As the device is not  
41  
42 waterproof children were instructed to remove it for water-based activities and record on  
43  
44 their log sheet the reason for removal and the duration of this non-wear time.  
45  
46  
47

#### 48 **Data management**

49  
50 Anthropometric and questionnaire data were entered into a specifically designed database.  
51  
52 10% of entries (using a random number generator) were subsequently checked by a second  
53  
54 researcher revealing only two data entry errors.  
55  
56  
57  
58  
59  
60

1  
2  
3  
4  
5  
6  
7 The raw accelerometry data from the pre and post time points was processed using kinesoft  
8 software (version 3.3.55) and quality control checks carried out. To be included in the  
9 analysis, participants had to have at least 10 hours of wear time a day on 3 week days and  
10 one weekend day. Days were counted if participants accrued 10 hours of wear time during  
11 the day. Periods of non-wear time were classified as 30 mins of zero counts. Those that  
12 failed to meet the inclusion criteria were excluded from subsequent analysis. Useable  
13 accelerometry data was obtained for 104/111 (95%) and 95/111 (85%) of participants at  
14 baseline and 18 months follow-up respectively.  
15  
16  
17  
18  
19  
20  
21  
22  
23

24 Eligible days of data were organised into time spent in each activity intensity per day.  
25 Activity intensity categories were classified using the following previously published cut  
26 points (sedentary: 0 to 299; light: 300 to 3580; moderate: 3581 to 6129; vigorous:  $\geq 6130$ )  
27 [33].  
28  
29  
30  
31  
32

### 33 **Statistical analysis**

34 As this was an exploratory study we sought to utilise the results, including the attrition rates  
35 and estimates of the intraclass correlations of the outcome measures, to help us plan a  
36 definitive cluster randomised controlled trial, including estimating the sample size needed  
37 for such a definitive trial.  
38  
39  
40  
41  
42  
43

44 The main analysis of the effect of the exploratory trial was undertaken on an intention-to-  
45 treat basis. As there was only a small number of missing data for some of the outcomes (see  
46 Figure 2), the analysis was based on all the available data, with no imputation for missing  
47 data. As this was an exploratory trial involving only four schools, only cluster level analyses  
48 were undertaken [34, 35]; this meant that the analyses could not be adjusted for individual-  
49  
50  
51  
52  
53  
54

1  
2  
3  
4  
5  
6  
7 level covariates (e.g. baseline measures). As there were varying numbers of children in each  
8 school, the analyses were weighted by cluster size [35, 36]; inverse variance weighting was  
9 not used, given the uncertainties in estimating the intraclass correlation coefficients.  
10  
11

12  
13 Differences between the intervention and control groups are presented, together with 95%  
14 confidence intervals. Unadjusted results (i.e. without clustering being taken into account)  
15 are also presented, in order to allow comparison of the precision of the estimates of the  
16 effect of the intervention. Intraclass correlation coefficients (and 95% confidence intervals)  
17 were calculated for selected outcomes. All analyses were undertaken in STATA version 11.1.  
18  
19  
20  
21  
22  
23

## 24 25 **RESULTS**

### 26 27 **Recruitment and participant characteristics at baseline**

28  
29 Figure 2 shows the flow of participants through the trial [37] and follow-up of  
30 anthropometric measures at 18 and 24 months. The intervention group consisted of two  
31 primary schools, one with 170 children on the school roll (13% eligible for free school meals  
32 (FSM) and one larger primary school with 384 children on the roll (2.6% FSM). The control  
33 group consisted of two primary schools, one with 317 on roll (14% FSM) and the other with  
34 364 on roll (6% FSM).  
35  
36  
37  
38  
39  
40  
41

42 Table 2 shows that the intervention and control groups were generally comparable at  
43 baseline with the percentages of children overweight/obese being 24% and 26%  
44 respectively [38]. Whilst there was higher percentage of obese and a higher percentage  
45 body fat ( $\geq 85^{\text{th}}$  and  $< 95^{\text{th}}$  centile) in the control schools, the continuous measurements had  
46 very similar means and ranges. Food intake on all categories were similar for both control  
47 and intervention groups, with an approximate ratio for HS:EDS and PM:NM of 1:1.  
48  
49  
50  
51  
52  
53  
54



1  
2  
3  
4  
5  
6  
7 Children's mean TV viewing/screen time was 2.6 hours a day, which mirrors national data  
8 for 4-15 year olds [16]. The percentage of children who had televisions in their bedrooms  
9 was higher in the control group compared to the intervention group, however, the  
10 percentage of children who had no rules regarding screen time was higher in the  
11 intervention group compared to the control group. Both groups spent a similar amount of  
12 time per day in sedentary activities but differed slightly in time spent in MVPA, however this  
13 varied greatly between children (range; 13.7-104 mins). Mean sedentary time (including  
14 sleep time) for all children was 16.2 hours/day.  
15  
16  
17  
18  
19  
20  
21  
22  
23

24 *Insert Fig 2*

25  
26  
27 *Insert Table 2*

### 28 29 30 **Intervention and control group comparisons at follow-up**

#### 31 *Anthropometric*

32 Anthropometric follow-up data was collected for 193 and 187 participants at 18 and 24  
33 months respectively (94% and 92% of the original cohort of 202 children). Table 3 shows the  
34 comparisons of the main outcomes at 18 and 24 month follow-ups between the children in  
35 the intervention schools and control schools. Children in the intervention schools typically  
36 fared better than those in the control schools having, on average, lower anthropometric  
37 measures at 18 and 24 months with larger differences at 24 months than at 18 months for  
38 all measures except percentage Body Fat sds. At 18 months, the proportion of overweight  
39 and obese children had increased by 6% in the control schools (from 26% (31/122) to 32%  
40 (38/119)) whilst remaining at baseline levels in the intervention schools (24% (18/74)). At  
41  
42  
43  
44  
45  
46  
47  
48  
49  
50  
51  
52 24 months the proportion of overweight/obese children remained at 32% (36/114) in the  
53  
54  
55  
56  
57  
58  
59  
60

**Comment [j3]:** R2. Wording changed to make it clearer

1  
2  
3  
4  
5  
6  
7 control schools and decreased slightly to 22% (16/73) in the intervention schools. The waist  
8 circumference data show similar proportions at baseline ( $\geq 85^{\text{th}}$  centile) shifting to an 8.7 %  
9 difference in favour of the intervention at 24 months.  
10  
11

### 12 *Behavioural*

13  
14 At 18 months follow-up, children in the intervention schools had fewer 'negative food  
15 markers', consumed less energy dense snacks and more healthy snacks, had more 'positive  
16 food markers', had lower mean TV/screen time and on average spent more time doing  
17 Moderate-Vigorous Physical Activity each day than children in the control schools.  
18  
19  
20  
21

22  
23  
24  
25 As expected, the 95% confidence intervals were narrower for all outcomes in the  
26 unadjusted results, when the clustering within schools was (incorrectly) not accounted for in  
27 the analyses.  
28  
29  
30  
31

### 32 *Estimation of intraclass correlation coefficients*

33  
34 The intraclass correlation coefficient (ICC) for BMI at 24 months for this exploratory trial was  
35 estimated to be 0.04 (95% CI: 0.00 to 0.15) and for BMI sds at 24 months was 0.06 (0.00 to  
36 0.19). As four clusters are insufficient to precisely estimate the intraclass correlation  
37 coefficients, we have looked at the effect of using a range of ICCs, based on both our pilot  
38 data and other published data in this field [39-41], in our sample size calculations for a  
39 definitive randomised controlled trial (see Table 4).  
40  
41  
42  
43  
44  
45  
46  
47  
48  
49  
50  
51  
52

### 53 *Estimation of sample size required for definitive trial*

1  
2  
3  
4  
5  
6  
7 Statistical efficiency will be maximised in a full trial by analysing BMI sds and adjusting for  
8 baseline values, which will reduce the standard error of the estimates of the difference  
9 between intervention and control. In this exploratory trial, the correlation between baseline  
10 and 24 month BMI sds was 0.93 (95% CI: 0.92 to 0.96).  
11  
12  
13

14  
15  
16  
17 The sample size estimates shown are based on recruiting 26 schools, each with an average  
18 of 50 children. Using BMI sds as the primary outcome measure at 24 months follow-up,  
19 Table 4 shows possible sample sizes required for a definitive trial, for a number of possible  
20 scenarios (varying possible effect sizes and ICCs). All sample size calculations are two-sided,  
21 significance level of 5%, with an adjustment for a more conservative reduction in variability  
22 (assuming a correlation between baseline and 24 month measures of 0.8) and assuming a  
23 loss to follow-up of 20%.  
24  
25  
26  
27  
28  
29  
30  
31

32  
33 A difference in BMI sds of 0.25 has been shown to be a meaningful change, impacting on  
34 improvement on adiposity and metabolic health [42]. Using a significance level of 5%, we  
35 would need to recruit 1267 children from 26 schools to be able to detect a true difference of  
36 at least 0.25, with 90% power, allowing for a conservative attrition rate of 20%, assuming an  
37 ICC of 0.03.  
38  
39  
40  
41  
42  
43  
44

## 45 **DISCUSSION**

46  
47 We have shown over three phases of piloting that HeLP is feasible and acceptable to  
48 schools, children and their families [25] and that the study design is feasible for a definitive  
49 evaluation. We were able to recruit and retain schools and children throughout the study,  
50 obtaining follow-up data from 92% of the original cohort at 24 months, after the children  
51  
52  
53  
54

1  
2  
3  
4  
5  
6  
7 had moved on to secondary school. In addition, we obtained useable accelerometry data  
8  
9 from 85% of the children at 18 months. We are aware that with a sample size of 202  
10  
11 children and only 4 schools, the trial was not powered to be able to provide precise  
12  
13 estimates of the effect of the intervention. Analyses were undertaken at cluster-level only,  
14  
15 thus unable to be adjusted for individual-level covariates (such as measures at baseline),  
16  
17 however, both behavioural and anthropometric outcome measures at 18 and 24 months  
18  
19 showed consistency in the direction of effects, all in favour of the intervention,  
20  
21 demonstrating 'proof of concept'.  
22  
23  
24

25 Although estimates of the differences between intervention and control schools were  
26  
27 imprecise, it is encouraging to see that there was a consistent positive impact on the  
28  
29 behaviours targeted (snacking, screen time and physical activity) and on anthropometric  
30  
31 values. When we began the development of this Programme back in 2005, we believed that  
32  
33 the cumulative effect of making small, sustainable changes in multiple behaviours related to  
34  
35 the energy balance had the potential to significantly impact on weight status. Interestingly,  
36  
37 there were larger differences at 24 months than at 18 months for all measures except  
38  
39 percentage body fat sds, which is encouraging, suggesting the potential of the Programme  
40  
41 to support children and their families to sustain these lifestyle changes in the longer term.  
42  
43  
44

45 Further evidence of 'proof of concept' is shown by looking at the weight status proportions.

46  
47 Whilst the proportion of overweight and obese were similar at baseline in both groups, in  
48  
49 the control schools, this increased to 32% at 18 months (matching our national data for  
50  
51 children of the same age) but remained at baseline levels in the intervention schools at both  
52  
53 the 18 and 24 month follow-up, suggesting that the intervention may have the effect of  
54  
55

1  
2  
3  
4  
5  
6  
7 preventing the shift from normal to overweight or overweight to obese that occurs during  
8  
9 this time. These results are supported by recent tracking data from England showing that  
10  
11 the greatest increases in weight in a non obese sample are between the ages of 7 and 11  
12  
13 years [8]. Our waist circumference data is particularly striking, showing a reduction of  
14  
15 almost 10% in those with a waist circumference greater than the 85<sup>th</sup> centile in the  
16  
17 intervention group at 24 months, whilst remaining at baseline levels in the control group.  
18  
19

20  
21 In the planned definitive RCT, more sophisticated statistical analyses will be able to be  
22  
23 undertaken at the individual level and, by incorporating individual level covariates, the  
24  
25 precision of effect of the intervention will be further improved. Despite being unable to do  
26  
27 this for the current study, the data obtained from this study has enabled us to calculate a  
28  
29 likely sample size required for the definitive evaluation.  
30  
31

### 32 33 **CONCLUSION**

34  
35 Situating an intervention within a school is not sufficient within itself to generate sustained  
36  
37 behaviour change. It is critical to engage and motivate children and to generate a supportive  
38  
39 social context involving the whole school as well as children's parents [43]. HeLP is unique in  
40  
41 that it uses highly inclusive and interactive delivery methods for a range of behaviour  
42  
43 change techniques to encourage identification with and ownership of the key messages,  
44  
45 ensuring that children have the information, motivation, behavioural skills and support  
46  
47 necessary to initiate and sustain change. Results from this exploratory trial show positive  
48  
49 changes in favour of the intervention across all targeted behaviours (snacking, screen time  
50  
51 and physical activity). Furthermore, these changes appear to have a sustained effect on  
52  
53 children's weight status and body shape. A definitive trial is now justified.  
54

1  
2  
3  
4  
5  
6  
7  
8  
9  
10  
11  
12  
13  
14  
15  
16  
17  
18  
19  
20  
21  
22  
23  
24  
25  
26  
27  
28  
29  
30  
31  
32  
33  
34  
35  
36  
37  
38  
39  
40  
41  
42  
43  
44  
45  
46  
47  
48  
49  
50  
51  
52  
53  
54  
55  
56  
57  
58  
59  
60

For peer review only

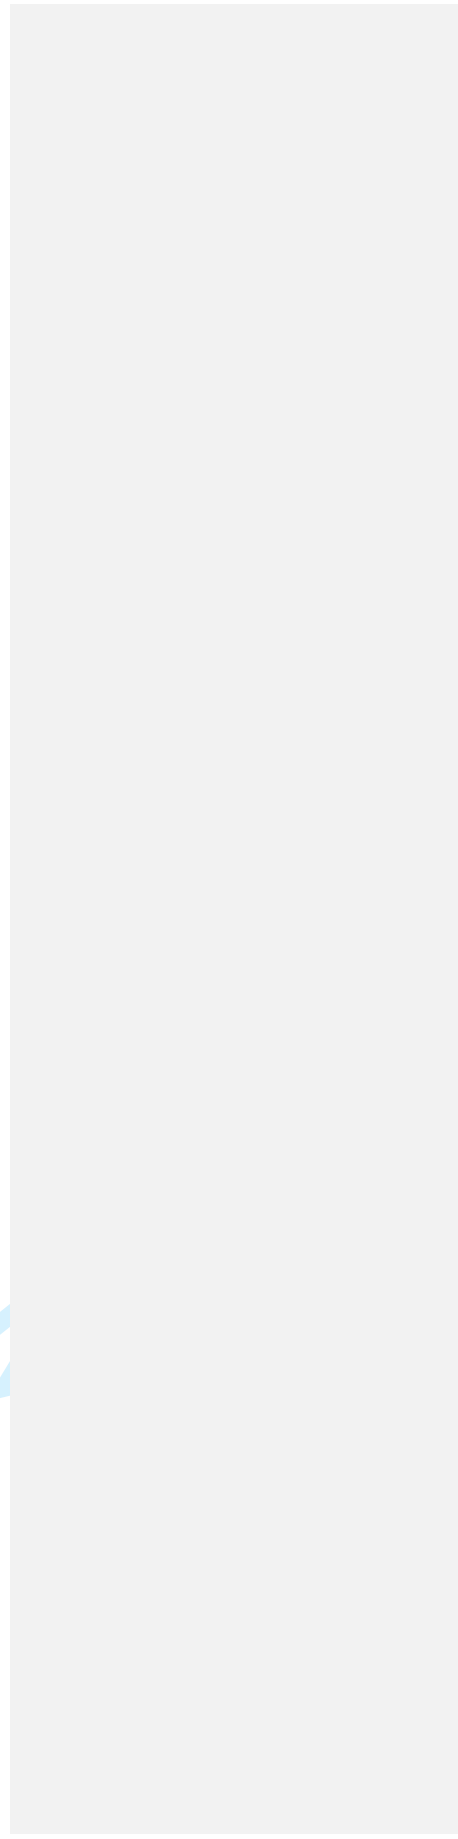

**Table 1** Intervention phases, change targets, BCTs and the method and agent of delivery.

| Intervention Phase                                                                                                                       | Change targets                                                                                                                                                                                                                                    | Behaviour change techniques                                                                                                                                                                                                                                 | Method (Frequency and duration) and agent of delivery                                                                                                                                                                                                                                  | Comment [j4]: R1 BCTs now map against descriptions from the new taxonomy (Michie et al., 2011)                                        |
|------------------------------------------------------------------------------------------------------------------------------------------|---------------------------------------------------------------------------------------------------------------------------------------------------------------------------------------------------------------------------------------------------|-------------------------------------------------------------------------------------------------------------------------------------------------------------------------------------------------------------------------------------------------------------|----------------------------------------------------------------------------------------------------------------------------------------------------------------------------------------------------------------------------------------------------------------------------------------|---------------------------------------------------------------------------------------------------------------------------------------|
| <b>Phase 1</b><br><b>Creating a supportive context</b><br><br>Spring term (Yr 5)                                                         | Establish relationships with schools, children and families<br>Raise awareness and increase knowledge<br><br>Promote positive attitudes and norms towards healthy eating and physical activity<br><br>Increase self efficacy for behaviour change | Provide information on behaviour-health link<br><br>Provide information on health behaviour link<br><br>Modelling/demonstrating behaviour<br>Prompt identification as a role model<br>Provide information on behaviour-health link<br>Skill building        | Whole school assembly (1) (20 mins)<br><br>Newsletter articles (3) (Over the Spring term)<br><br>Activity workshops (2) (parents observe) (1.5 hours)<br><br>Parents' evening (1) involving child performances (1 hour)                                                                | HeLP Coordinators<br><br>HeLP Coordinators<br><br>Professional sportsmen/dancers<br><br>Class teachers/ HeLP Coordinator /Drama group |
| <b>Phase 2</b><br><b>Intensive Healthy Lifestyles Week – one week</b><br><br>Summer term (Yr 5)                                          | Strengthen relationships with schools, children and families<br>Increase knowledge<br>Increase self awareness<br>Increase self efficacy<br>Develop communication and problem solving skills<br>Increase social support (school, peer and family)  | Provide information on health behaviour link<br><br>Problem solving/barrier identification<br>Modelling/demonstrating behaviour<br>Prompt identification as a role model<br>Communication skills training<br>Teach to use prompts and cues                  | *PSHE lessons (5) (morning) (1 hour)<br><br>\$Drama (5) (afternoon) (forum theatre; role play; food tasting, discussions, games etc) (2 hours)                                                                                                                                         | Class teacher<br><br>Drama group                                                                                                      |
| <b>Phase 3</b><br><b>Personal Goal Setting with Parental Support-</b><br>goals set during week following drama<br><br>Summer term (Yr 5) | Increase awareness of own behaviour<br><br>Increase self efficacy for change<br>Develop planning skills<br>Increase parental support                                                                                                              | Self monitoring<br><br>Goal setting (behaviour)<br>Problem solving/barrier identification<br>Plan social support<br>Provide information on where and when to perform a behaviour<br>Agree behavioural contract<br><br>Prompt identification as a role model | Self reflection questionnaire (1) (40 mins)<br><br>Goal setting sheet to go home to parents to complete with child (1) (10 mins)<br><br>1:1 goal setting interview (1) (goals sent home to parents) (10 mins)<br><br>Parent's evening (1) (child involvement – Forum Theatre) (1 hour) | HeLP Coordinator/ Class teacher<br><br>HeLP Coordinator /Parents<br><br>HeLP Coordinator<br><br>HeLP Coordinator /Drama group         |
| <b>Phase 4</b><br><b>Reinforcement Activities</b><br><br>Autumn term (Yr 6)                                                              | Increase self awareness and prioritise healthy goals. Consolidate social support.<br><br>Develop monitoring and coping skills<br>Increase parental support                                                                                        | Provide information on health behaviour link<br><br>Prompt self monitoring<br>Prompt intention formation<br>Follow up prompts<br><br>Prompt practice<br><br>Prompt review of behavioural goals                                                              | Newsletter articles (2) (over the Autumn term)<br>Whole school assembly (1) (20 mins)<br><br>Drama workshop (1) (1 hour)<br>*PSHE lesson (1) (1 hour)<br><br>Class to deliver assembly about the project to rest of school (1) (20 mins)                                               | HeLP Coordinator<br>Drama group<br><br>Drama group<br>Class teacher<br><br>Children to all other year groups in the school            |

|  |  |                                                              |                                                                                                                                                                                               |                  |
|--|--|--------------------------------------------------------------|-----------------------------------------------------------------------------------------------------------------------------------------------------------------------------------------------|------------------|
|  |  | Prompt barrier identification and resolution<br>Coping plans | (parents invited to attend)<br><br>1-to-1 goal supporting interview to discuss facilitators/barriers and to plan new coping strategies (1) ( 10 mins)<br>(renewed goals sent home to parents) | HeLP Coordinator |
|--|--|--------------------------------------------------------------|-----------------------------------------------------------------------------------------------------------------------------------------------------------------------------------------------|------------------|

\* PSHE – Personal, Social and Health Education

§The drama framework includes 4 characters, each represented by one of the actors, whose attributes related to the three key behaviours. Children choose which of the characters they most resemble then work with that actor to help the character learn to change their behaviour.

**Table 2** Baseline characteristics of children allocated to the intervention and control

|                                                                                                     | Intervention<br>(n=80)       | Control<br>(n=122)           | Total<br>(n=202)             |
|-----------------------------------------------------------------------------------------------------|------------------------------|------------------------------|------------------------------|
| <b>Demographics</b>                                                                                 |                              |                              |                              |
| Age, years, mean (SD)                                                                               | 9.69 (0.3)                   | 9.69 (0.3)                   | 9.69 (0.3)                   |
| <b>Sex</b>                                                                                          |                              |                              |                              |
| % (n) Male                                                                                          | 50.0 (40)                    | 50.0 (61)                    | 50.0 (101)                   |
| % (n) Female                                                                                        | 50.0 (40)                    | 50.0 (61)                    | 50.0 (101)                   |
| Total % of all children in the schools eligible for free school meals                               | 5.7                          | 9.7                          | 7.9                          |
| <b>Anthropometric Measures</b>                                                                      |                              |                              |                              |
| % (n) Overweight ( $\geq 85^{\text{th}}$ and $< 95^{\text{th}}$ centile) <sup>a</sup>               | 10.5 (8)                     | 7.6 (9)                      | 8.7 (17)                     |
| % (n) Obese ( $\geq 95^{\text{th}}$ centile)                                                        | 13.2 (10)                    | 18.5 (22)                    | 16.4 (32)                    |
| % (n) Underweight ( $\leq 2^{\text{nd}}$ centile)                                                   | 1.3 (1)                      | 0.0 (0)                      | 0.5 (1)                      |
| % (n) with Bodyfat ( $\geq 85^{\text{th}}$ and $< 95^{\text{th}}$ centile) <sup>b</sup>             | 5.3 (4)                      | 11.8 (14)                    | 9.2 (18)                     |
| % (n) with Bodyfat $\geq 95^{\text{th}}$ centile                                                    | 11.8 (9)                     | 10.1 (12)                    | 10.8 (21)                    |
| % (n) with Bodyfat $\leq 2^{\text{nd}}$ centile                                                     | 19.7 (15)                    | 14.3 (17)                    | 16.4 (32)                    |
| % (n) with Waist Circumference ( $\geq 85^{\text{th}}$ and $< 95^{\text{th}}$ centile) <sup>c</sup> | 21.3 (17)                    | 21.3 (26)                    | 21.3 (43)                    |
| % (n) with Waist Circumference $\geq 95^{\text{th}}$ centile                                        | 21.3 (17)                    | 21.3 (26)                    | 21.3 (43)                    |
| Mean (sd) BMI<br>[range]                                                                            | 17.4 (2.6)<br>[13.3 to 25.4] | 17.8 (2.8)<br>[13.7 to 25.1] | 17.6 (2.7)<br>[13.3 to 25.4] |
| Mean (sd) BMI sds<br>[range]                                                                        | 0.3 (1.1)<br>[-2.3 to 2.5]   | 0.4 (1.1)<br>[-2.0 to 2.9]   | 0.3 (1.1)<br>[-2.3 to 2.9]   |
| Mean (sd) % Bodyfat<br>[range]                                                                      | 19.3 (6.8)<br>[3.0 to 37.4]  | 20.0 (6.7)<br>[7.6 to 36.8]  | 19.71 (6.8)<br>[3.0 to 37.4] |
| Mean (sd) % Bodyfat sds<br>[range]                                                                  | -0.9 (3.4)<br>[-25.8 to 2.3] | -0.5 (1.7)<br>[-6.5 to 2.4]  | -0.6 (2.5)<br>[-25.8 to 2.4] |
| Mean (sd) Waist Circumference (cm)<br>[range]                                                       | 62.0 (6.5)<br>[50 to 81]     | 62.6 (7.0)<br>[52 to 83]     | 62.3 (6.8)<br>[50 to 83]     |
| Mean (sd) Waist circumference sds<br>[range]                                                        | 0.8 (1.0)<br>[-1.9 to 3.0]   | 0.91 (1.0)<br>[-1.2 to 3.2]  | 0.9 (1.0)<br>[-1.9 to 3.2]   |
| <b>Food Intake*(sd)</b>                                                                             |                              |                              |                              |
| Mean (sd) Energy Dense Snacks (EDS)<br>[range]                                                      | 4.2 (2.2)<br>[0.0 to 10.7]   | 4.1 (2.1)<br>[0.3 to 11.2]   | 4.2 (2.1)<br>[0.0 to 11.2]   |
| Mean (sd) Healthy Snacks (HS)<br>[range]                                                            | 3.2 (1.6)<br>[0.3 to 8.4]    | 3.4 (1.7)<br>[0.0 to 8.0]    | 3.4 (1.7)<br>[0.0 to 8.4]    |
| Mean (sd) Positive Food Markers (PM)                                                                | 7.3 (2.9)                    | 7.6 (3.3)                    | 7.5 (3.1)                    |



|                                          |                |                 |                 |
|------------------------------------------|----------------|-----------------|-----------------|
| [range]                                  | [2.6 to 15.0]  | [2.3 to 20.3]   | [2.3 to 20.3]   |
| Mean (sd) Negative Food Markers (NM)     | 6.8 (3.3)      | 6.8 (3.2)       | 6.8 (3.2)       |
| [range]                                  | [1.4 to 16.6]  | [0.3 to 20.2]   | [0.3 to 20.2]   |
| <b>TV/screen viewing</b>                 |                |                 |                 |
| Mean (sd) TV/screen viewing (hours/day)  | 2.5 (1.7)      | 2.7 (1.7)       | 2.6 (1.7)       |
| [range]                                  | [0.1 to 7.9]   | [0.3 to 8.4]    | [0.1 to 8.4]    |
| % (n) with TV in bedroom                 | 45.6 (36)      | 59.8 (73)       | 54.2 (109)      |
| % (n) with no rules re TV/screen time    | 39.2 (31)      | 33.9 (40)       | 36.0 (71)       |
| <b>Physical activity (mean time/day)</b> |                |                 |                 |
| Moderate-Vigorous PA/day (mins)          | 36.7 (12.0)    | 49.5 (20.0)     | 43.6 (17.9)     |
| [range]                                  | [13.7 to 70.0] | [18.1 to 104.4] | [13.7 to 104.4] |
| Sedentary Activities/day (hours)         | 16.2 (1.6)     | 16.4 (1.9)      | 16.2 (1.9)      |
| [range]                                  | [9.8 to 18.7]  | [10.6 to 19.2]  | [9.3 to 19.2]   |

\*Refers to the number of different EDS/HS/PM/NM consumed in a day

a [38]

b [44]

c [45]

**Table 3:** Difference in outcomes at 18 and 24 months follow-up of children allocated to the intervention and control groups.

| Outcome                                                     | Mean difference (Intervention minus Control) (95% CI) |                           |                           |                           |
|-------------------------------------------------------------|-------------------------------------------------------|---------------------------|---------------------------|---------------------------|
|                                                             | 18 months                                             |                           | 24 months                 |                           |
|                                                             | Unadjusted                                            | Adjusted for clustering   | Unadjusted                | Adjusted for clustering   |
| <b>BMI</b>                                                  | -0.95<br>(-1.88 to -0.02)                             | -0.95<br>(-3.79 to 1.90)  | -1.16<br>(-2.15 to -0.18) | -1.16<br>(-3.82 to 1.49)  |
| <b>BMI sds</b>                                              | -0.38<br>(-0.74 to -0.02)                             | -0.38<br>(-1.65 to 0.89)  | -0.45<br>(-0.82 to -0.08) | -0.45<br>(-1.71 to 0.81)  |
| <b>%Body fat</b>                                            | -0.83<br>(-3.01 to 1.36)                              | -0.83<br>(-6.26 to 4.60)  | -1.28<br>(-3.60 to 1.05)  | -1.28<br>(-8.69 to 6.14)  |
| <b>%Body fat sds</b>                                        | -0.33<br>(-1.04 to 0.38)                              | -0.33<br>(-2.52 to 1.85)  | -0.21<br>(-0.85 to 0.42)  | -0.21<br>(-2.45 to 2.03)  |
| <b>Waist circumference (cm)</b>                             | -2.01<br>(-4.23 to 0.21)                              | -2.01<br>(-9.54 to 5.52)  | -2.97<br>(-5.36 to -0.59) | -2.97<br>(-10.30 to 4.35) |
| <b>Waist circumference sds</b>                              | -0.32<br>(-0.63 to -0.01)                             | -0.32<br>(-1.52 to 0.87)  | -0.46<br>(-0.79 to -0.13) | -0.46<br>(-1.72 to 0.80)  |
| <b>% with BMI ≥85<sup>th</sup> centile</b>                  | -7.6<br>(-20.5 to 5.3)                                | -7.6<br>(-49.4 to 34.2)   | -9.7<br>(-22.4 to 3.1)    | -9.7<br>(-27.8 to 8.5)    |
| <b>% with %Body fat ≥ 85<sup>th</sup> centile obese</b>     | -5.5<br>(-15.6 to 4.6)                                | -5.5<br>(-31.8 to 20.9)   | -6.4<br>(-17.8 to 5.1)    | -6.4<br>(-34.9 to 22.1)   |
| <b>% with Waist circumference ≥ 85<sup>th</sup> centile</b> | -5.9<br>(-20.1 to 8.3)                                | -5.9<br>(-50.7 to 39.0)   | -8.7<br>(-22.9 to 5.4)    | -8.7<br>(-58.9 to 41.4)   |
| <b>Energy dense snacks (EDS)</b>                            | -0.28<br>(-0.83 to 0.27)                              | -0.28<br>(-0.83 to 0.27)  | -                         | -                         |
| <b>Healthy snacks (HS)</b>                                  | 0.47<br>(0.02 to 0.92)                                | 0.47<br>(-1.29 to 2.23)   | -                         | -                         |
| <b>Positive food markers (PM)</b>                           | 0.38<br>(-0.37 to 1.13)                               | 0.38<br>(-1.55 to 2.31)   | -                         | -                         |
| <b>Negative food markers (NM)</b>                           | -0.69<br>(-1.52 to 0.15)                              | -0.69<br>(-1.70 to 0.33)  | -                         | -                         |
| <b>Duration of TV viewing (hours/day)</b>                   | -0.41<br>(-0.91 to 0.09)                              | -0.41<br>(-1.28 to 0.46)  | -                         | -                         |
| <b>Sedentary Activities/day (hours)</b>                     | -0.04<br>(-1.09 to 1.01)                              | -0.04<br>(-1.91 to 1.84)  | -                         | -                         |
| <b>Moderate-Vigorous PA/day (mins)</b>                      | 5.67<br>(0.20 to 11.15)                               | 5.67<br>(-12.59 to 23.93) | -                         | -                         |

**Table 4:** Sample size calculations for a definite RCT with primary outcome of BMI sds at 24 months under different assumptions

|      | 80% Power                     |      |      | 90% Power                     |      |      |
|------|-------------------------------|------|------|-------------------------------|------|------|
|      | Minimum Difference Detectable |      |      | Minimum Difference Detectable |      |      |
| ICC  | 0.25                          | 0.30 | 0.50 | 0.25                          | 0.30 | 0.50 |
| 0.01 | 571                           | 397  | 145  | 764                           | 531  | 193  |
| 0.03 | 947                           | 658  | 240  | 1267                          | 880  | 320  |
| 0.06 | 1511                          | 1050 | 383  | 2021                          | 1404 | 511  |
| 0.10 | 2262                          | 1572 | 573  | 3027                          | 2103 | 765  |

<sup>1</sup>All numbers are the total number of children required to be recruited, assuming 50 children per school and a loss to follow-up at 24 months of 20%.

<sup>2</sup>The calculations take into account the reduction in variability associated with adjusting for baseline BMI sds, conservatively assuming the correlation between baseline and 24 months data to be 0.8 (in our pilot study this correlation was 0.93).

<sup>3</sup>This is the sample size required to detect a true minimal difference in BMI sds of 0.25, 0.3 or 0.5, assuming the standard deviation is 1.3 (based on our pilot data).

**Acknowledgements:** The authors are very grateful to the staff, pupils and parents of the 4 participating schools, who gave up their time for the study. We would also like to acknowledge Sandy Akerman (Headbangers Theatre Company) who supported the design of the drama component of the intervention and Stuart Logan who helped design the study and secure funding.

**Competing interests:** None

**Funding:** The Exploratory trial was funded by the NIHR Research for Patient Benefit (RfPB) Programme. JL and KW were partially supported by PenCLAHRC, the National Institute for Health Research (NIHR) CLAHRC for the Southwest Peninsula. This paper presents independent research commissioned by the National Institute for Health Research (NIHR). The views expressed are those of the author(s) and not necessarily those of the NHS, the NIHR or the Department of Health.

**Ethics approval:** Ethical approval was granted from the Peninsula College of Medicine and Dentistry Ethics Committee in 2008.

**Author contribution:** JL drafted the manuscript with KW and SC providing critical revision. SC carried out the statistical analysis and drafted this section of the manuscript. JL developed and supported the design and production of the intervention materials, coordinated the implementation of the intervention and the collection of measurements at baseline, 18 and 24 months. JL, KW and SL designed the study and obtained funding. JL will act as guarantor of the paper. All authors approved the final version of the manuscript to be published.

## References

1. Johnson B, Hackett AF. Eating habits of 11–14-year-old schoolchildren living in less affluent areas of Liverpool, UK. *J Hum Nutr Diet* 1997;**10**:135-44.
2. Owens J, Maxim R, McGuinn M, et al. Television-viewing Habits and Sleep Disturbance in School Children. *Pediatrics* 1999;**104**:e27.
3. Jackson-Leach R, Lobstein T. Estimated burden of paediatric obesity and co-morbidities in Europe. Part 1. The increase in the prevalence of child obesity in Europe is itself increasing. *Int J Pediatr Obes* 2006;**1**:26-32.
4. The NHS Information centre. Health Survey for England - 2008 Trend Tables. London: 2009.
5. National Child Measurement Programme. Results from the School Year 2009/10 Oxford: 2010.
6. Gunnell DJ, Frankel SJ, Nanchahal K, et al. Childhood obesity and adult cardiovascular mortality: a 57-y follow-up study based on the Boyd Orr cohort. *Am J Clin Nutr* 1998;**67**:1111-8.
7. Singh AS, Mulder C, Twisk JWR, et al. Tracking of childhood overweight into adulthood: a systematic review of the literature. *Obes Rev* 2008;**9**:474-88.
8. Hughes AR, Sherriff A, Lawlor DA, et al. Incidence of obesity during childhood and adolescence in a large contemporary cohort. *Prev Med* 2011;**52**:300-4.
9. Lake JK, Power C, Cole TJ. Child to adult body mass index in the 1958 British birth cohort: associations with parental obesity. *Arch Dis Child* 1997;**77**:376-80.
10. Li L, Law C, Lo Conte R, et al. Intergenerational influences on childhood body mass index: the effect of parental body mass index trajectories. *Am J Clin Nutr* 2009;**89**:551-7.
11. Nielsen SJ, Popkin BM. Patterns and trends in food portion sizes, 1977-1998. *JAMA* 2003;**289**:450-3.
12. National Travel Survey. Trends in personal travel trips, distance travelled and time taken per person per year: Great Britain, since 1972/73. London: 2010.
13. Molnár D, Livingstone B. Physical activity in relation to overweight and obesity in children and adolescents. *Eur J Pediatr* 2000;**159**:S45-S55.
14. Wareham N. Physical activity and obesity prevention. *Obes Rev* 2007;**8 Suppl 1**:109-14.
15. Riddoch CJ, Leary SD, Ness AR, et al. Prospective associations between objective measures of physical activity and fat mass in 12-14 year old children: the Avon Longitudinal Study of Parents and Children (ALSPAC). *BMJ* 2009;**339**.
16. Childwise. The Childwise Monitor Trends report 2010/11. Norwich: 2011.

17. Marshall SJ, Biddle SJ, Gorely T, et al. Relationships between media use, body fatness and physical activity in children and youth: a meta-analysis. *Int J Obes Relat Metab Disord* 2004;**28**:1238-46.
18. Wiecha JL, Peterson KE, Ludwig DS, et al. When Children Eat What They Watch: Impact of Television Viewing on Dietary Intake in Youth. *Arch Pediatr Adolesc Med* 2006;**160**:436-42.
19. Halford JCG, Gillespie J, Brown V, et al. Effect of television advertisements for foods on food consumption in children. *Appetite* 2004;**42**:221-5.
20. de Silva-Sanigorski A, Bolton K, Haby M, et al. Scaling up community-based obesity prevention in Australia: Background and evaluation design of the Health Promoting Communities: Being Active Eating Well initiative. *BMC Public Health* 2010;**10**:1-7.
21. de Silva-Sanigorski AM, Bell AC, Kremer P, et al. Reducing obesity in early childhood: results from Romp & Chomp, an Australian community-wide intervention program. *Am J Clin Nutr* 2010;**91**:831-40.
22. Brown T, Summerbell C. Systematic review of school-based interventions that focus on changing dietary intake and physical activity levels to prevent childhood obesity: an update to the obesity guidance produced by the National Institute for Health and Clinical Excellence. *Obes Rev* 2009;**10**:110-41.
23. Craig P, Dieppe P, Macintyre S, et al. Developing and evaluating complex interventions: the new Medical Research Council guidance. *BMJ* 2008;**337**:a1655.
24. Lloyd JJ, Logan S, Greaves CJ, et al. Evidence, Theory and Context - Using intervention mapping to develop a school-based intervention to prevent obesity in children. *Int J Behav Nutr Phys Act* 2011;**8**:73.
25. Wyatt KM, Lloyd JJ, Creanor S, et al. The development, feasibility and acceptability of a school-based obesity prevention programme: results from three phases of piloting. *BMJ Open* 2011. <http://bmjopen.bmj.com/content/early/2011/05/23/bmjopen-2010-000026.abstract> (accessed 13 September 2011).
26. Fisher JD, Fisher WA. The information-motivation-behavioral skills model. In: DiClemente R, Crosby R, Kegler M, eds. *Emerging theories in health promotion practice and research*. San Francisco: Jossey-Bass 2002:40-70.
27. Fisher JD, Fisher WA, Amico KR, et al. An Information-Motivation-Behavioral Skills Model of Adherence to Antiretroviral Therapy. *Health Psych* 2006;**25**:462-73.
28. Fisher JD, Fisher WA, Williams SS, et al. Empirical Tests of an Information-Motivation-Behavioral Skills Model of AIDS-Preventive Behavior With Gay Men and Heterosexual University Students. *Health Psych* 1994;**13**:238-50.
29. NICE. *Obesity: the prevention, identification, assessment and management of overweight and obesity in adults and children*. London: NICE 2006.
30. Bartholomew LK. *Planning health promotion programs: an intervention mapping approach*. San Francisco: Jossey-Bass 2006:171-459.
31. Michie S, Ashford S, Sniehotta FF, et al. A refined taxonomy of behaviour change techniques to help people change their physical activity and healthy eating behaviours: the CALO-RE taxonomy. *Psychol Health* 2011;**26**:1479-98.
32. Abraham C, Michie S. A taxonomy of behavior change techniques used in interventions. *Health Psychol* 2008;**27**:379-87.
33. Stone MR, Rowlands AV, Eston RG. Characteristics of the activity pattern in normal weight and overweight boys. *Prev Med* 2009;**49**:205-8.
34. Kerry SM, Bland JM. Trials which randomize practices I: how should they be analysed? *Family Practice* 1998;**15**:80-3.
35. Donner A, Klar N. *Design and analysis of cluster randomization trials in health research*. London: Arnold 2000:1-178.
36. Bland JM, Kerry SM. Weighted comparison of means. *BMJ* 1998;**316**:129.

- 1
- 2
- 3
- 4
- 5
- 6
- 7 37. Campbell M, Elbourne D, Altman D. CONSORT statement: extension to cluster randomised trials. *BMJ* 2004;**328**:702 - 8.
- 8 38. Cole TJ, Freeman JV, Preece MA. Body mass index reference curves for the UK, 1990. *Arch Dis Child* 1995;**73**:25-9.
- 9 39. Taylor RW, McAuley KA, Barbezat W, et al. APPLE Project: 2-y findings of a community-based obesity prevention program in primary school age children. *Am J Clin Nutr* 2007;**86**:735-42.
- 10 40. Gortmaker SL, Peterson K, Wiecha J, et al. Reducing obesity via a school-based interdisciplinary intervention among youth: Planet Health. *Arch Pediatr Adolesc Med* 1999;**153**:409-18.
- 11 41. Caballero B, Clay T, Davis SM, et al. Pathways: a school-based, randomized controlled trial for the prevention of obesity in American Indian schoolchildren. *Am J Clin Nutr* 2003;**78**:1030-8.
- 12 42. Ford AL, Hunt LP, Cooper A, et al. What reduction in BMI SDS is required in obese adolescents to improve body composition and cardiometabolic health? *Arch Dis Child* 2009.
- 13 43. Foresight. Tackling obesity: future choices-project report. London: The Stationery Office 2007.
- 14 44. McCarthy HD, Cole TJ, Fry T, et al. Body fat reference curves for children. *Int J Obes* 2006;**30**:598-602.
- 15 45. McCarthy HD, Jarrett KV, Crawley HF. The development of waist circumference percentiles in British children aged 5.0-16.9 y. *Eur J Clin Nutr* 2001;**55**:902-7.
- 16
- 17
- 18
- 19
- 20
- 21
- 22
- 23
- 24
- 25
- 26
- 27
- 28
- 29
- 30
- 31
- 32
- 33
- 34
- 35
- 36
- 37
- 38
- 39
- 40
- 41
- 42
- 43
- 44
- 45
- 46
- 47
- 48
- 49
- 50
- 51
- 52
- 53
- 54
- 55
- 56
- 57
- 58
- 59
- 60
